# Supplementary material for: Synthesis and Evaluation of Biological Activities of Bis(spiropyrazolone)cyclopropanes: A Potential Application against Leishmaniasis
Source: MDPI journal article supplement (doi:10.3390/molecules26164960), 2021-08-17
Supplement: s1 [file s1]

## Supporting Information

# Synthesis and evaluation of biological activities of Bis(spiropyrazolone)cyclopropanes: a potential application against leishmaniasis.

Olalla Barreiro-Costa<sup>1,†</sup>, Gabriela Morales-Noboa<sup>2,†</sup>, Patricio Rojas-Silva<sup>1</sup>, Eliana Lara-Barba<sup>2</sup>, Javier Santamaría-Aguirre<sup>2</sup>, Natalia Bailón-Moscoso<sup>3</sup>, Juan Carlos Romero-Benavides<sup>4</sup>, Ana Herrera<sup>3</sup>, Cristina Cueva<sup>3</sup>, Lenin Ron-Garrido<sup>2</sup>, Ana Poveda<sup>2,\*</sup> and Jorge Heredia-Moya<sup>1,\*</sup>

- <sup>1</sup> Centro de Investigación Biomédica (CENBIO), Facultad de Ciencias de la Salud Eugenio Espejo, Universidad UTE, Quito 170527, Ecuador; olallabarreirocosta@gmail.com, (O.B.-C.)  
projas1@usfq.edu.ec (P.R.-S.), jorgeh.heredia@ute.edu.ec (J.H.-M.)
- <sup>2</sup> DNA replication and Genome Instability Unit, Grupo de Investigación en Biodiversidad, Zoonosis y Salud Pública (GIBCI), Instituto de Investigación en Salud Pública y Zoonosis-CIZ, Facultad de Ciencias Químicas, Facultad de Ciencias Agrícolas, Universidad Central del Ecuador, Quito 170521, Ecuador; gemoralesnobia@hotmail.com, (G.M.-N.) eliluci1@hotmail.com, (E.L.-B.), jrsantamaria@uce.edu.ec, (J. S.-A.), lron@uce.edu.ec, (L.R.-G.), apoveda@uce.edu.ec (A.P.)
- <sup>3</sup> Departamento de Ciencias de la Salud, Universidad Técnica Particular de Loja, Loja 1101608, Ecuador; ncbailon@utpl.edu.ec (N. B.-M.), mccueva5@utpl.edu.ec (C.C.), agherrera5@utpl.edu.ec (A. H.)
- <sup>4</sup> Departamento de Química y Ciencias Exactas, Universidad Técnica Particular de Loja, Loja 1101608, Ecuador; jcromerob@utpl.edu.ec (J.C.R.-B.)
- \* Correspondence: apoveda@uce.edu.ec (A.P.) and jorgeh.heredia@ute.edu.ec (J.H.-M.)
- † These authors contributed equally to this work.

## Supporting Figures

- Figure S1.** Cell morphology of RKO, PC-3 and HeLa cell lines exposed to the Inhibitory concentration (IC<sub>50</sub>) of the most active bis (spiropyrazolone) cyclopropanes for 48 hours. Data are given as mean and standard error (SEM) of at least three independent experiments. Horizontal bar in the figure below = 50  $\mu$ m. 4
- Figure S2.** Drop test for *S. cerevisiae* strains in presence of bis(spiropyrazolone)cyclopropanes **4**. Each line of serial-diluted cells dots corresponds with the strain indicated at the left of the panel. The compound evaluated in each panel is indicated below. 4
- Figure S3.** Stability of bis(spiropyrazolone)cyclopropanes **4**. (A) Absorbance spectra at 480 nm of **4b** (100  $\mu$ M) in DMSO at different time of incubation at 25 °C. (B) Absorbance spectra at 480 nm of **4b** (100  $\mu$ M) in PBS 1X pH 7.4 at different time of incubation at 25 °C. (C) Stability of **4b** (2300  $\mu$ M) in DMSO and PBS 1X pH 7.4 at different time of incubation at 25 °C. (D) Inhibitory activity of products of thermal isomerization of bis(spiropyrazolone)cyclopropanes **4** against *L. mexicana* promastigotes at 10  $\mu$ M. 5
- Figure S4.** Representative examples of *Leishmania mexicana* cells exposed to bis(spiropyrazolone)cyclopropanes **4** and subjected to comet assay. C, control unexposed cells; DMSO, dimethyl sulfoxide; MMS, methyl methanesulfonate. 6
- Figure S5.** <sup>1</sup>H NMR spectrum of compound **2a** 7
- Figure S6.** <sup>1</sup>H NMR spectrum of compound **2b** 7
- Figure S7.** <sup>1</sup>H NMR spectrum of compound **2c** 8
- Figure S8.** <sup>1</sup>H NMR spectrum of compound **2d** 8
- Figure S9.** <sup>1</sup>H NMR spectrum of compound **2e** 9
- Figure S10.** <sup>1</sup>H NMR spectrum of compound **2f** 9
- Figure S11.** <sup>1</sup>H NMR spectrum of compound **2g** 10

|                                                                         |    |
|-------------------------------------------------------------------------|----|
| <b>Figure S12.</b> $^1\text{H}$ NMR spectrum of compound <b>2h</b>      | 10 |
| <b>Figure S13.</b> $^{13}\text{C}$ NMR spectrum of compound <b>2h</b>   | 11 |
| <b>Figure S14.</b> FTIR spectrum of compound <b>2h</b>                  | 11 |
| <b>Figure S15.</b> HRMS spectrum of compound <b>2h</b>                  | 12 |
| <b>Figure S16.</b> $^1\text{H}$ NMR spectrum of compound <b>2i</b> .    | 12 |
| <b>Figure S17.</b> $^1\text{H}$ NMR spectrum of compound <b>2j</b> .    | 13 |
| <b>Figure S18.</b> $^1\text{H}$ NMR spectrum of compound <b>2k</b> .    | 13 |
| <b>Figure S19.</b> $^1\text{H}$ NMR spectrum of compound <b>2l</b> .    | 14 |
| <b>Figure S20.</b> $^1\text{H}$ NMR spectrum of compound <b>2m</b>      | 14 |
| <b>Figure S21.</b> $^{13}\text{C}$ NMR spectrum of compound <b>2m</b>   | 15 |
| <b>Figure S22.</b> FTIR spectrum of compound <b>2m</b>                  | 15 |
| <b>Figure S23.</b> HRMS spectrum of compound <b>2m</b>                  | 16 |
| <b>Figure S24.</b> $^1\text{H}$ NMR spectrum of compound <b>2n</b> .    | 16 |
| <b>Figure S25.</b> $^1\text{H}$ NMR spectrum of compound <b>2o</b> .    | 17 |
| <b>Figure S26.</b> $^1\text{H}$ NMR spectrum of compound <b>2p</b> .    | 17 |
| <b>Figure S27.</b> $^{19}\text{F}$ NMR spectrum of compound <b>2p</b> . | 18 |
| <b>Figure S28.</b> $^1\text{H}$ NMR spectrum of compound <b>2q</b> .    | 18 |
| <b>Figure S29.</b> $^1\text{H}$ NMR spectrum of compound <b>2r</b> .    | 19 |
| <b>Figure S30.</b> $^1\text{H}$ NMR spectrum of compound <b>2s</b> .    | 19 |
| <b>Figure S31.</b> $^1\text{H}$ NMR spectrum of compound <b>2t</b> .    | 20 |
| <b>Figure S32.</b> $^1\text{H}$ NMR spectrum of compound <b>2u</b> .    | 20 |
| <b>Figure S33.</b> $^1\text{H}$ NMR spectrum of compound <b>4b</b>      | 21 |
| <b>Figure S34.</b> $^{13}\text{C}$ NMR spectrum of compound <b>4b</b>   | 21 |
| <b>Figure S35.</b> FTIR spectrum of compound <b>4b</b>                  | 22 |
| <b>Figure S36.</b> ESI-MS spectrum of compound <b>4b</b>                | 22 |
| <b>Figure S37.</b> $^1\text{H}$ NMR spectrum of compound <b>4c</b>      | 23 |
| <b>Figure S38.</b> $^{13}\text{C}$ NMR spectrum of compound <b>4c</b>   | 23 |
| <b>Figure S39.</b> FTIR spectrum of compound <b>4c</b>                  | 24 |
| <b>Figure S40.</b> ESI-MS spectrum of compound <b>4c</b>                | 24 |
| <b>Figure S41.</b> $^1\text{H}$ NMR spectrum of compound <b>4d</b>      | 25 |
| <b>Figure S42.</b> $^{13}\text{C}$ NMR spectrum of compound <b>4d</b>   | 25 |
| <b>Figure S43.</b> FTIR spectrum of compound <b>4d</b>                  | 26 |
| <b>Figure S44.</b> ESI-MS spectrum of compound <b>4d</b>                | 26 |
| <b>Figure S45.</b> $^1\text{H}$ NMR spectrum of compound <b>4e</b>      | 27 |
| <b>Figure S46.</b> $^{13}\text{C}$ NMR spectrum of compound <b>4e</b>   | 27 |
| <b>Figure S47.</b> FTIR spectrum of compound <b>4e</b>                  | 28 |
| <b>Figure S48.</b> ESI-MS spectrum of compound <b>4e</b>                | 28 |
| <b>Figure S49.</b> $^1\text{H}$ NMR spectrum of compound <b>4f</b>      | 29 |
| <b>Figure S50.</b> $^{13}\text{C}$ NMR spectrum of compound <b>4f</b>   | 29 |
| <b>Figure S51.</b> $^1\text{H}$ NMR spectrum of compound <b>4k</b>      | 30 |
| <b>Figure S52.</b> $^{13}\text{C}$ NMR spectrum of compound <b>4k</b>   | 30 |
| <b>Figure S53.</b> FTIR spectrum of compound <b>4k</b>                  | 31 |
| <b>Figure S54.</b> ESI-MS spectrum of compound <b>4k</b>                | 31 |
| <b>Figure S55.</b> $^1\text{H}$ NMR spectrum of compound <b>4p</b>      | 32 |
| <b>Figure S56.</b> $^{13}\text{C}$ NMR spectrum of compound <b>4p</b>   | 32 |
| <b>Figure S57.</b> $^{19}\text{F}$ NMR spectrum of compound <b>4p</b>   | 33 |
| <b>Figure S58.</b> FTIR spectrum of compound <b>4p</b>                  | 33 |
| <b>Figure S59.</b> ESI-MS spectrum of compound <b>4p</b>                | 34 |
| <b>Figure S60.</b> $^1\text{H}$ NMR spectrum of compound <b>4q</b>      | 34 |
| <b>Figure S61.</b> $^{13}\text{C}$ NMR spectrum of compound <b>4q</b>   | 35 |
| <b>Figure S62.</b> FTIR spectrum of compound <b>4q</b>                  | 35 |
| <b>Figure S63.</b> ESI-MS spectrum of compound <b>4q</b>                | 36 |
| <b>Figure S64.</b> $^1\text{H}$ NMR spectrum of compound <b>4r</b>      | 36 |

|                                                                       |    |
|-----------------------------------------------------------------------|----|
| <b>Figure S65.</b> <sup>13</sup> C NMR spectrum of compound <b>4r</b> | 37 |
| <b>Figure S66.</b> <sup>19</sup> F NMR spectrum of compound <b>4r</b> | 37 |
| <b>Figure S67.</b> FTIR spectrum of compound <b>4r</b>                | 38 |
| <b>Figure S68.</b> ESI-MS spectrum of compound <b>4r</b>              | 38 |
| <b>Figure S69.</b> <sup>1</sup> H NMR spectrum of compound <b>4s</b>  | 39 |
| <b>Figure S70.</b> <sup>13</sup> C NMR spectrum of compound <b>4s</b> | 39 |
| <b>Figure S71.</b> <sup>19</sup> F NMR spectrum of compound <b>4s</b> | 40 |
| <b>Figure S72.</b> FTIR spectrum of compound <b>4s</b>                | 40 |
| <b>Figure S73.</b> ESI-MS spectrum of compound <b>4s</b>              | 41 |
| <b>Figure S74.</b> <sup>1</sup> H NMR spectrum of compound <b>4t</b>  | 41 |
| <b>Figure S75.</b> <sup>13</sup> C NMR spectrum of compound <b>4t</b> | 42 |
| <b>Figure S76.</b> <sup>19</sup> F NMR spectrum of compound <b>4t</b> | 42 |
| <b>Figure S77.</b> FTIR spectrum of compound <b>4t</b>                | 43 |
| <b>Figure S78.</b> ESI-MS spectrum of compound <b>4t</b>              | 43 |
| <b>Figure S79.</b> <sup>1</sup> H NMR spectrum of compound <b>4u</b>  | 44 |
| <b>Figure S80.</b> <sup>13</sup> C NMR spectrum of compound <b>4u</b> | 44 |
| <b>Figure S81.</b> FTIR spectrum of compound <b>4u</b>                | 45 |
| <b>Figure S82.</b> ESI-MS spectrum of compound <b>4u</b>              | 45 |
| <b>Figure S83.</b> <sup>1</sup> H NMR spectrum of compound <b>5g</b>  | 46 |
| <b>Figure S84.</b> <sup>1</sup> H NMR spectrum of compound <b>6</b>   | 46 |
| <b>Figure S85.</b> <sup>13</sup> C NMR spectrum of compound <b>6</b>  | 47 |
| <b>Figure S86.</b> DEPT spectrum of compound <b>6</b>                 | 47 |
| <b>Figure S87.</b> HSQC spectrum of compound <b>6</b>                 | 48 |
| <b>Figure S88.</b> HMBC spectrum of compound <b>6</b>                 | 48 |
| <b>Figure S89.</b> FTIR spectrum of compound <b>6</b>                 | 49 |
| <b>Figure S90.</b> ESI-MS spectrum of compound <b>6</b>               | 49 |

## Supporting Tables

|                                                                                                                                                                                          |    |
|------------------------------------------------------------------------------------------------------------------------------------------------------------------------------------------|----|
| <b>Table S1.</b> Percentage (%) of inhibition of five human cancer cell lines, and immortalized cell CHO K-1 exposed 48 h to 100 μM of each bis(spiropyrazolone)cyclopropanes <b>4</b> . | 50 |
| <b>Table S2.</b> Inhibitory activity of bis(spiropyrazolone)cyclopropanes <b>4</b> against <i>S. cerevisiae</i> (W303 background).                                                       | 50 |
| <b>Table S3.</b> DPPH scavenging activity of bis(spiropyrazolone)cyclopropanes <b>4</b> .                                                                                                | 51 |

## Statistical Analyses

|                                                                                                                                                                                                                   |    |
|-------------------------------------------------------------------------------------------------------------------------------------------------------------------------------------------------------------------|----|
| <b>Statistical Analyses S1.</b> Test for statistical significance were based on one-way ANOVA test applied to leishmanicidal and cytotoxicity activities of bis(spiropyrazolone)cyclopropanes <b>4</b> (Table 3). | 55 |
| <b>Statistical Analyses S2.</b> Kruskal Wallis test's applied to comet assay of <i>Leishmania mexicana</i> cells exposed to bis(spiropyrazolone)cyclopropanes <b>4</b> (Figure 2).                                | 55 |
| <b>Statistical Analyses S3.</b> Kruskal Wallis test's applied to comet assay of CHO cells exposed to bis(spiropyrazolone)cyclopropanes <b>4</b> (Figure 3).                                                       | 58 |

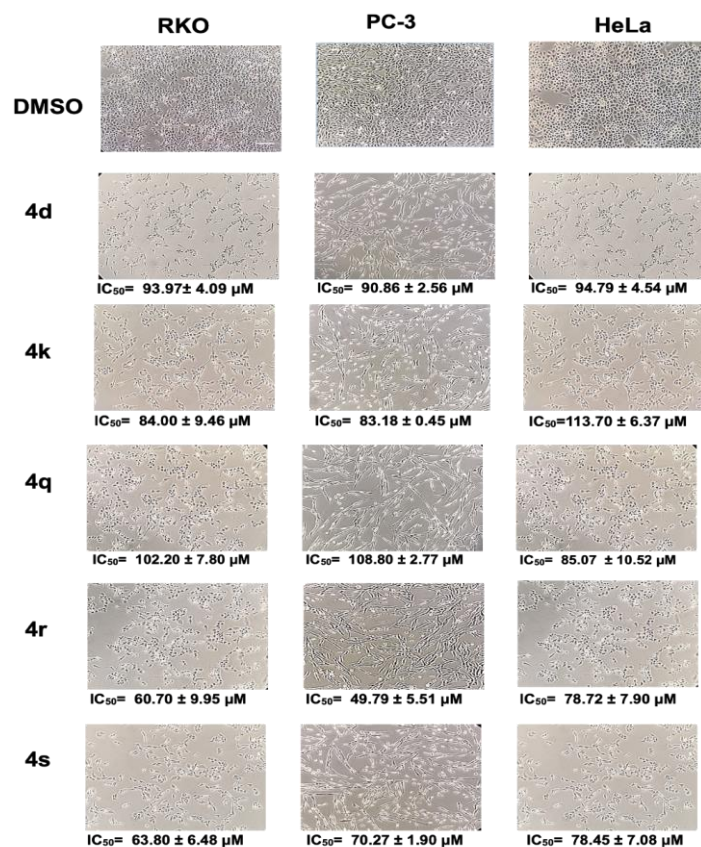

**Figure S1.** Cell morphology of RKO, PC-3 and HeLa cell lines exposed to the Inhibitory concentration (IC<sub>50</sub>) of the most active bis (spiropyrazolone) cyclopropanes for 48 hours. Data are given as mean and standard error (SEM) of at least three independent experiments. Horizontal bar in the figure below = 50 μm.

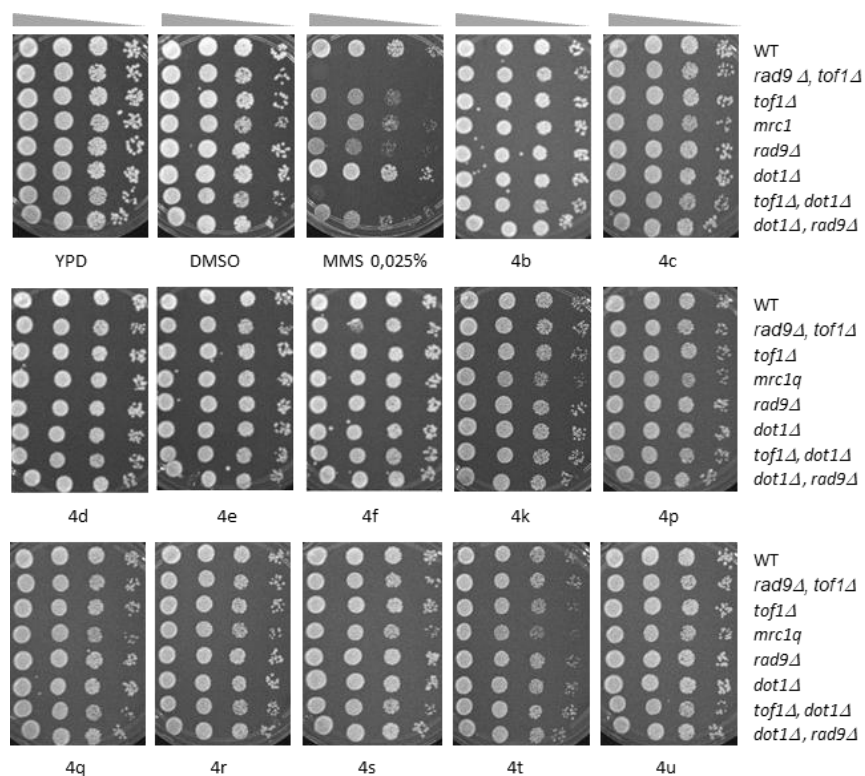

**Figure S2.** Drop test for *S. cerevisiae* strains in presence of bis(spiropyrazolone)cyclopropanes 4. Each line of serial-diluted cells dots corresponds with the strain indicated at the left of the panel. The compound evaluated in each panel is indicated below.

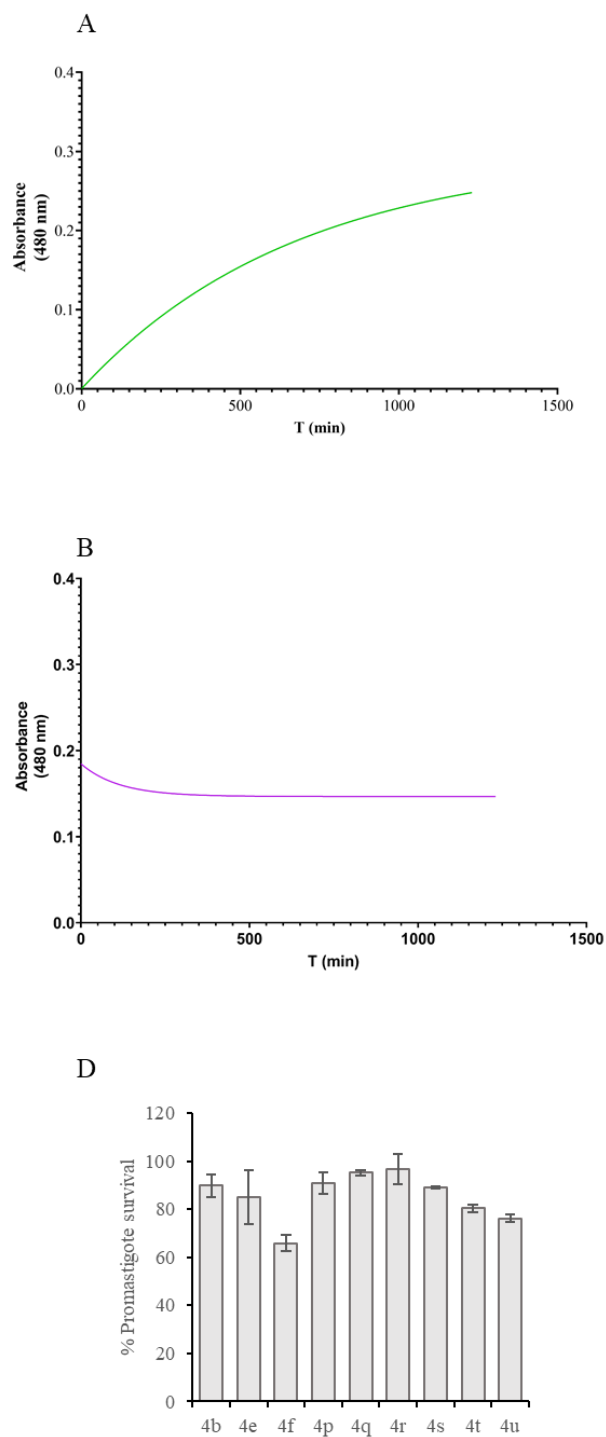

| 4b in DMSO                  |                      |
|-----------------------------|----------------------|
| One phase exponential decay |                      |
| Best-fit values             |                      |
| Span                        | -0.2963              |
| K                           | 0.001472             |
| Plateau                     | 0.2965               |
| HalfLife                    | 471.0                |
| Tau                         | 679.5                |
| 95% CI (profile likelihood) |                      |
| Span                        | -0.3016 to -0.2914   |
| K                           | 0.001406 to 0.001538 |
| Plateau                     | 0.2906 to 0.3027     |
| HalfLife                    | 450.8 to 493.0       |
| Tau                         | 650.3 to 711.3       |
| Goodness of Fit             |                      |
| Degrees of Freedom          | 39                   |
| R squared                   | 0.9991               |
| Sum of Squares              | 0.0001981            |
| Sy.x                        | 0.002254             |
| Constraints                 |                      |
| K                           | K > 0                |
| Number of points            |                      |

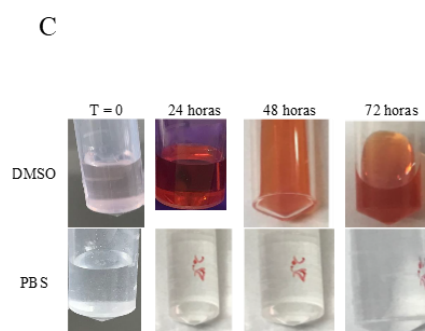

**Figure S3.** Stability of bis(spiropyrazolone)cyclopropanes **4**. (A) Absorbance spectra at 480 nm of **4b** (100  $\mu$ M) in DMSO at different time of incubation at 25  $^{\circ}$ C. (B) Absorbance spectra at 480 nm of **4b** (100  $\mu$ M) in PBS 1X pH 7.4 at different time of incubation at 25  $^{\circ}$ C. (C) Stability of **4b** (2300  $\mu$ M) in DMSO and PBS 1X pH 7.4 at different time of incubation at 25  $^{\circ}$ C. (D) Inhibitory activity of products of thermal isomerization of bis(spiropyrazolone)cyclopropanes **4** against *L. mexicana* promastigotes at 10  $\mu$ M.

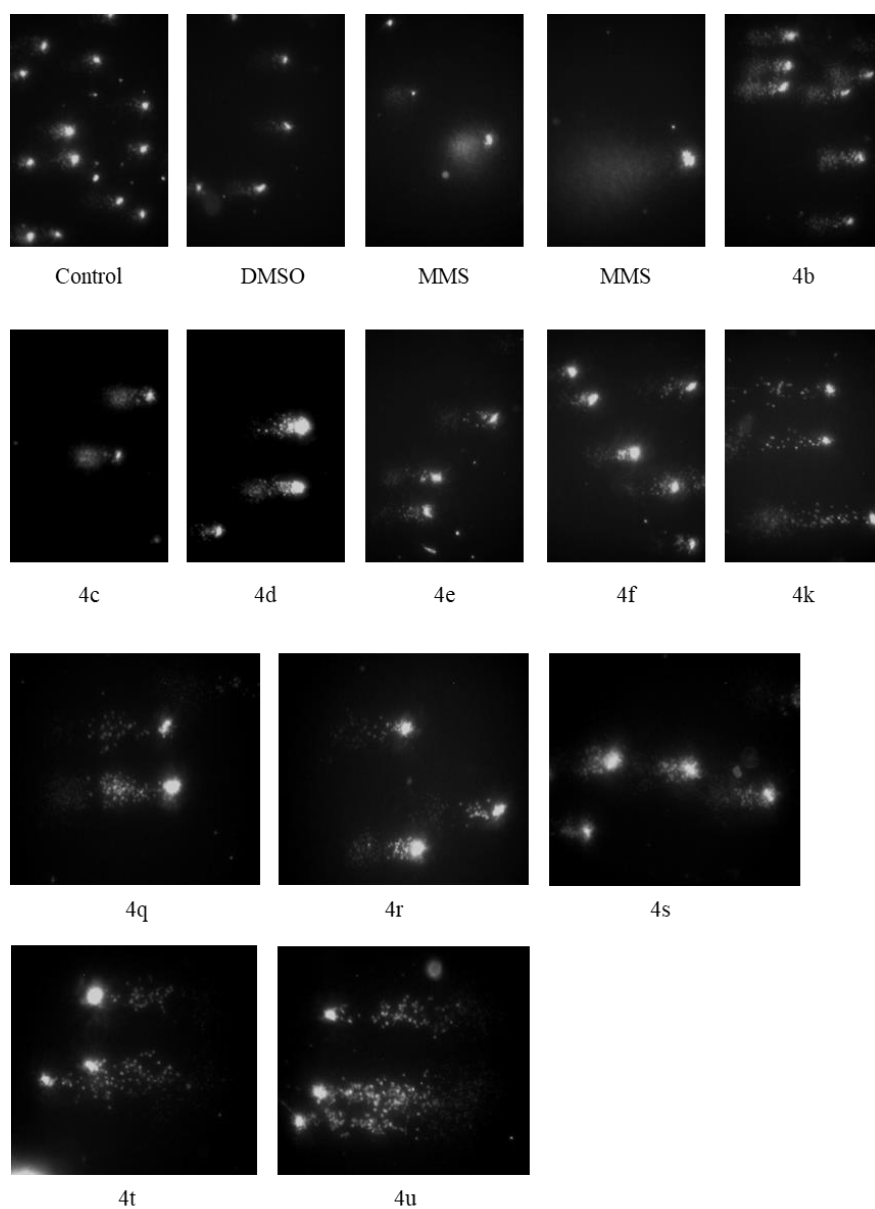

**Figure S4.** Representative examples of *Leishmania mexicana* cells exposed to bis(spiropyrazolone)cyclopropanes **4** and subjected to comet assay. C, control unexposed cells; DMSO, dimethyl sulfoxide; MMS, methyl methanesulfonate.

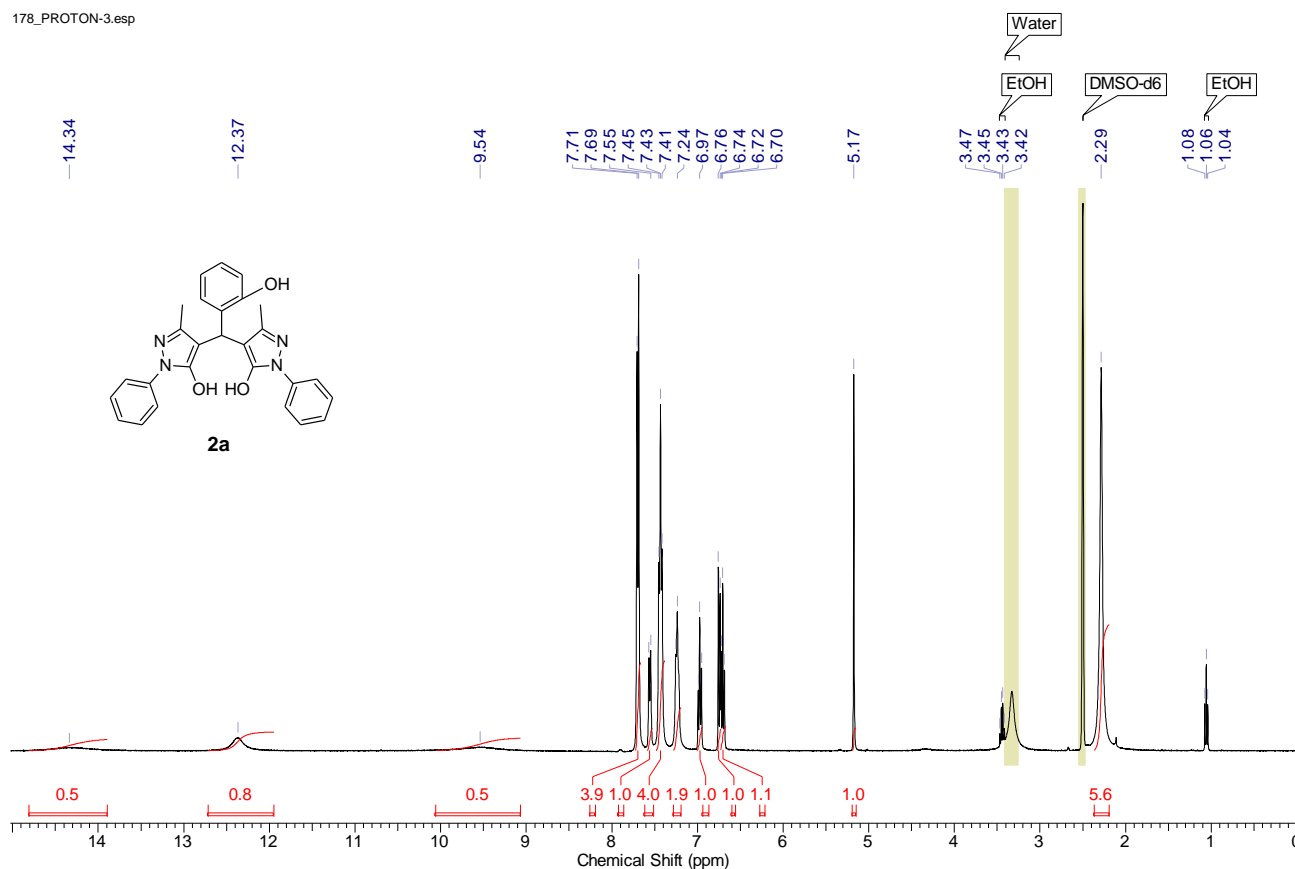Figure S5. <sup>1</sup>H NMR spectrum of compound 2a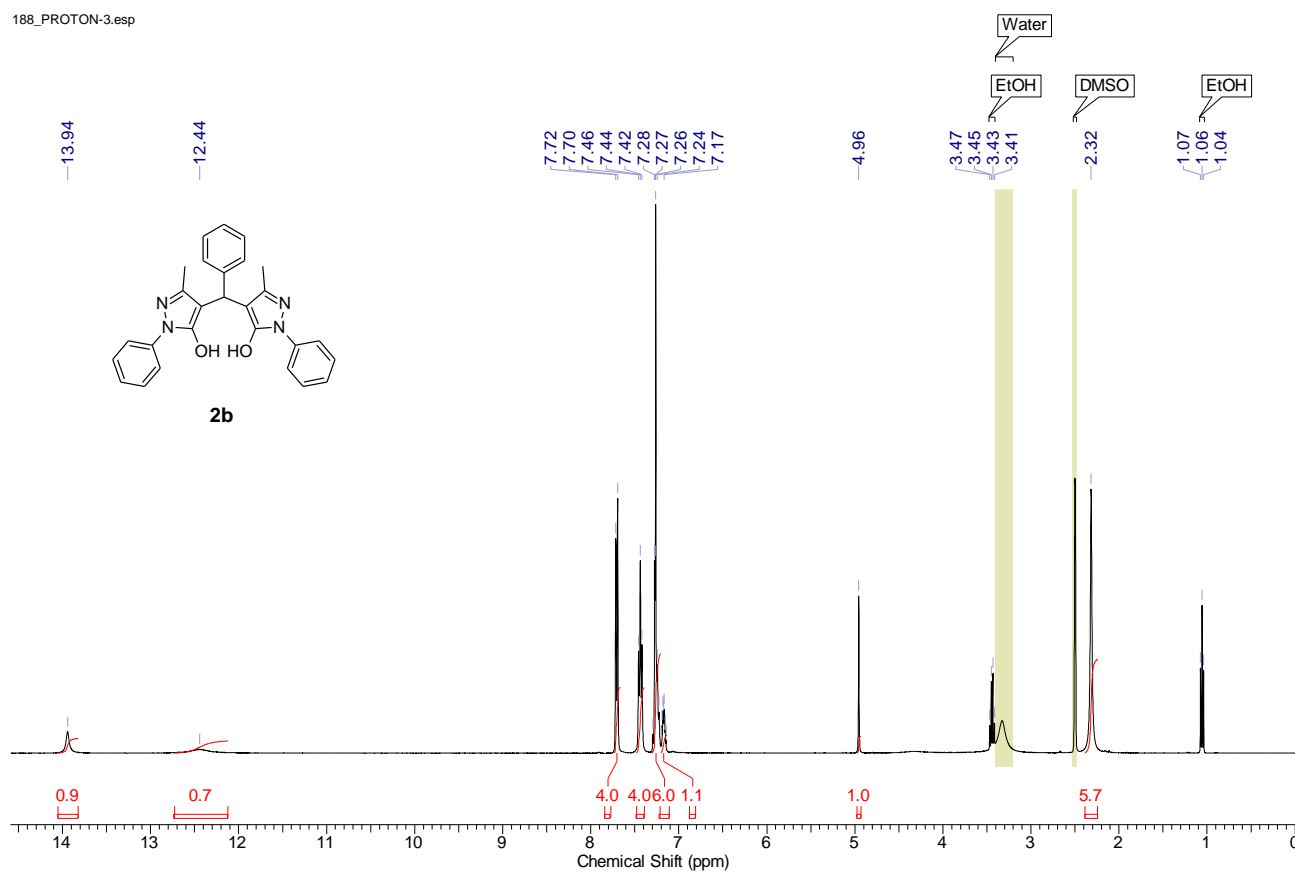Figure S6. <sup>1</sup>H NMR spectrum of compound 2b

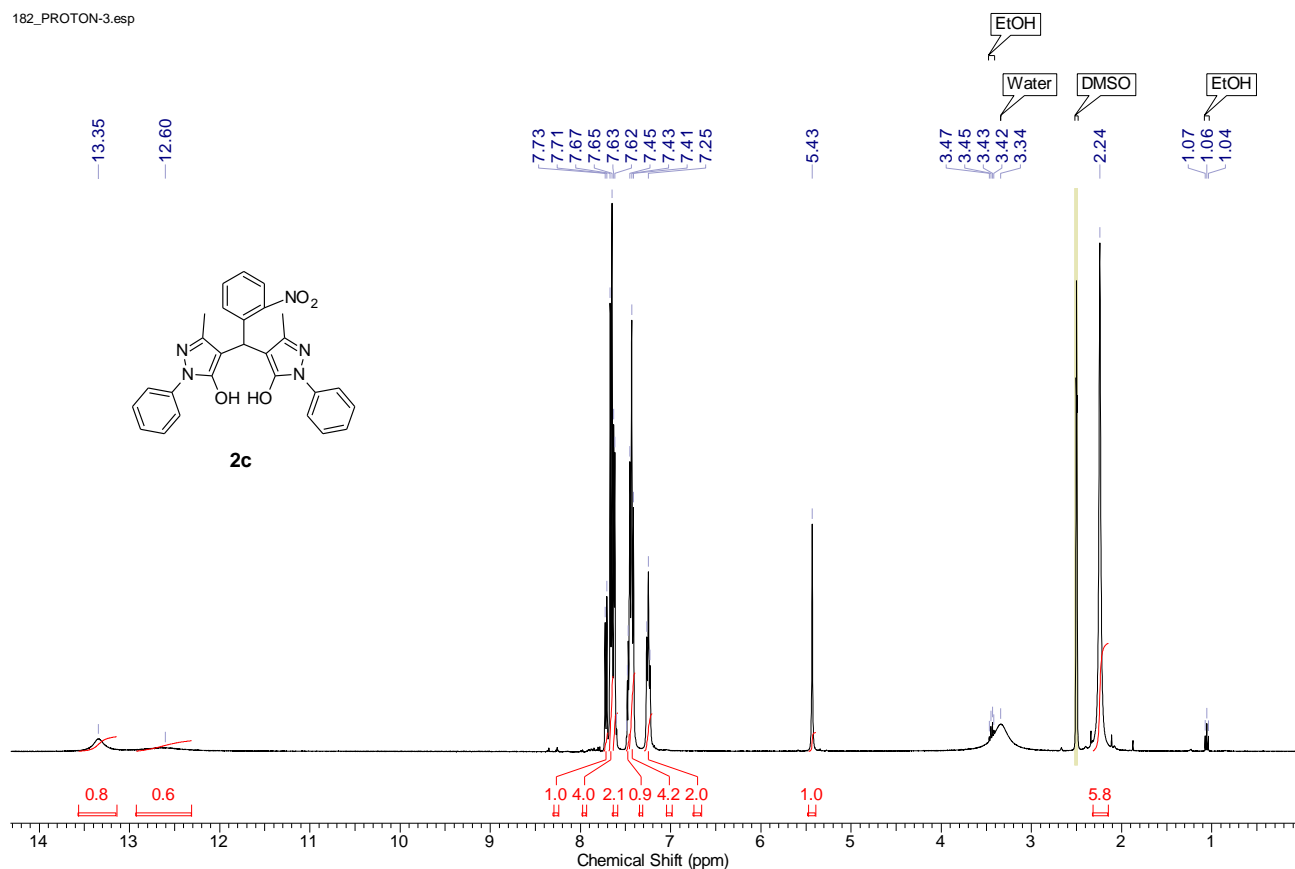Figure S7. <sup>1</sup>H NMR spectrum of compound **2c**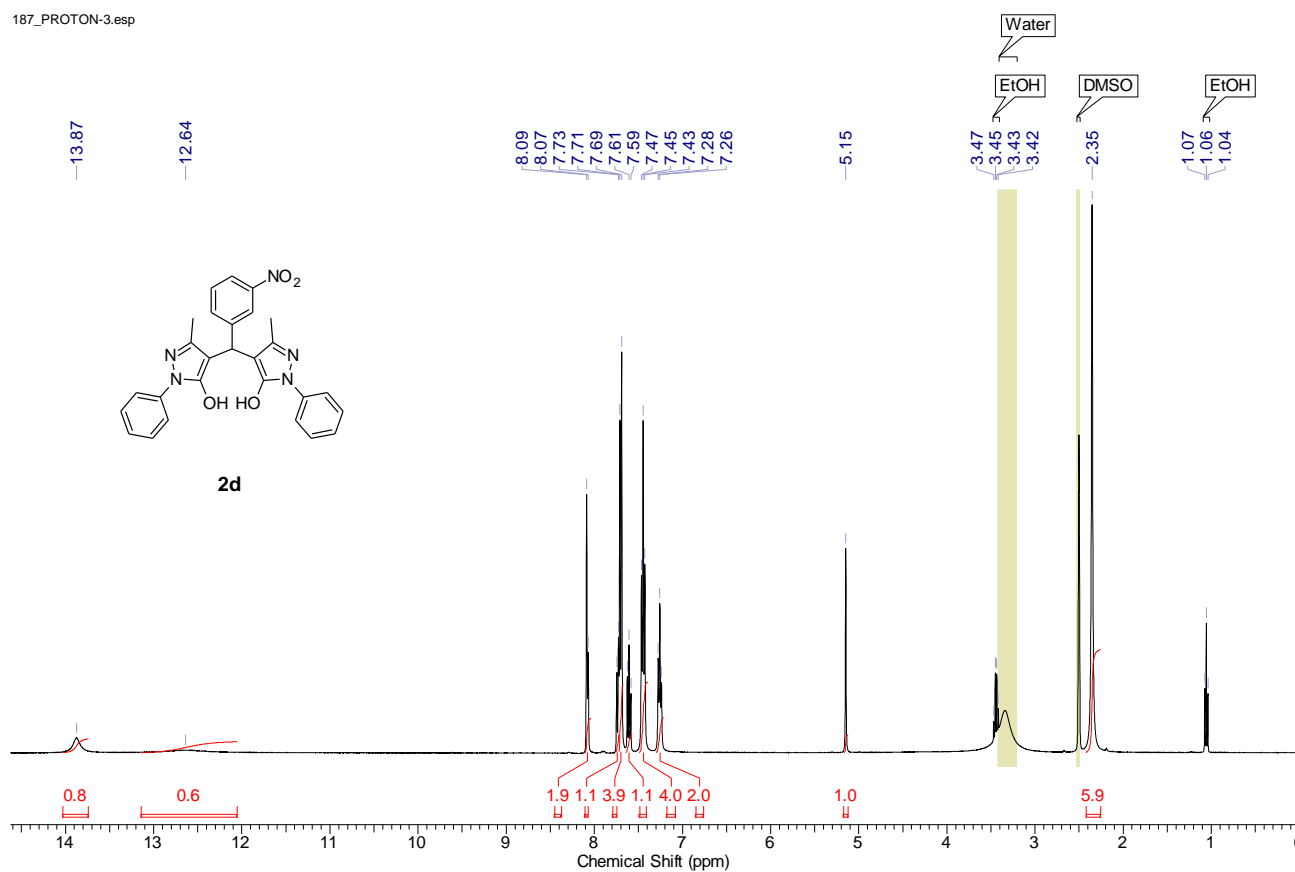Figure S8. <sup>1</sup>H NMR spectrum of compound **2d**



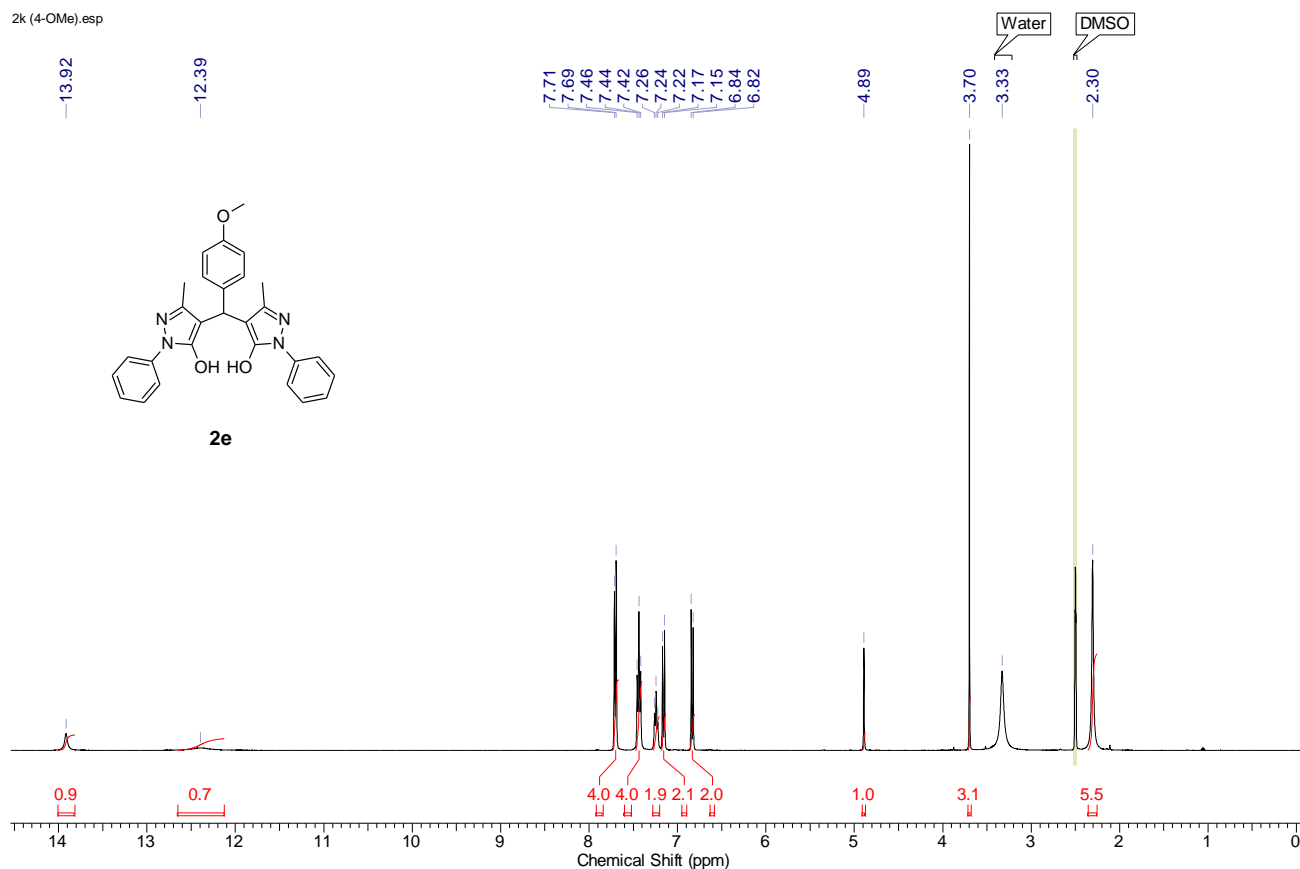

Figure S9.  $^1\text{H}$  NMR spectrum of compound **2e**

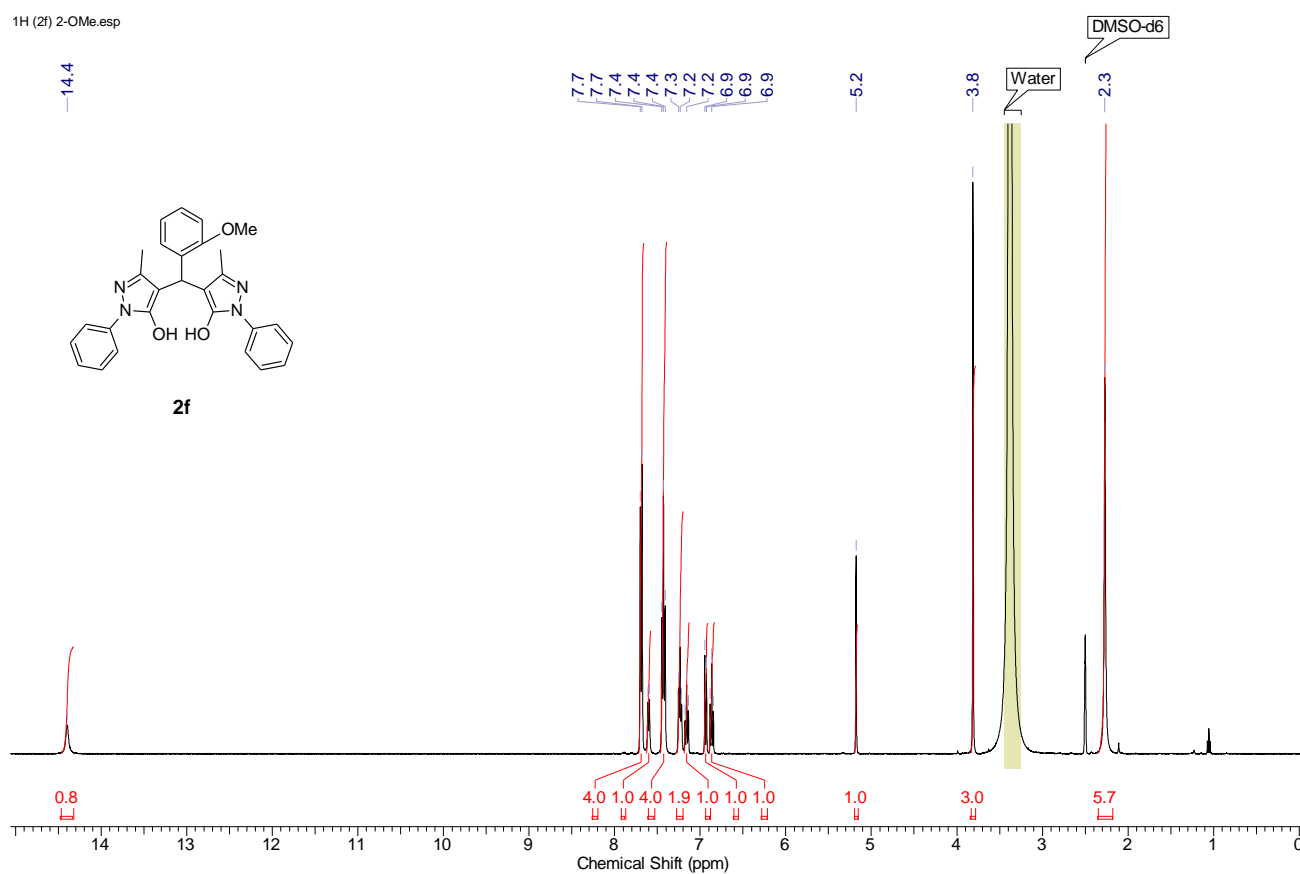

Figure S10.  $^1\text{H}$  NMR spectrum of compound **2f**

181\_PROTON-3.esp

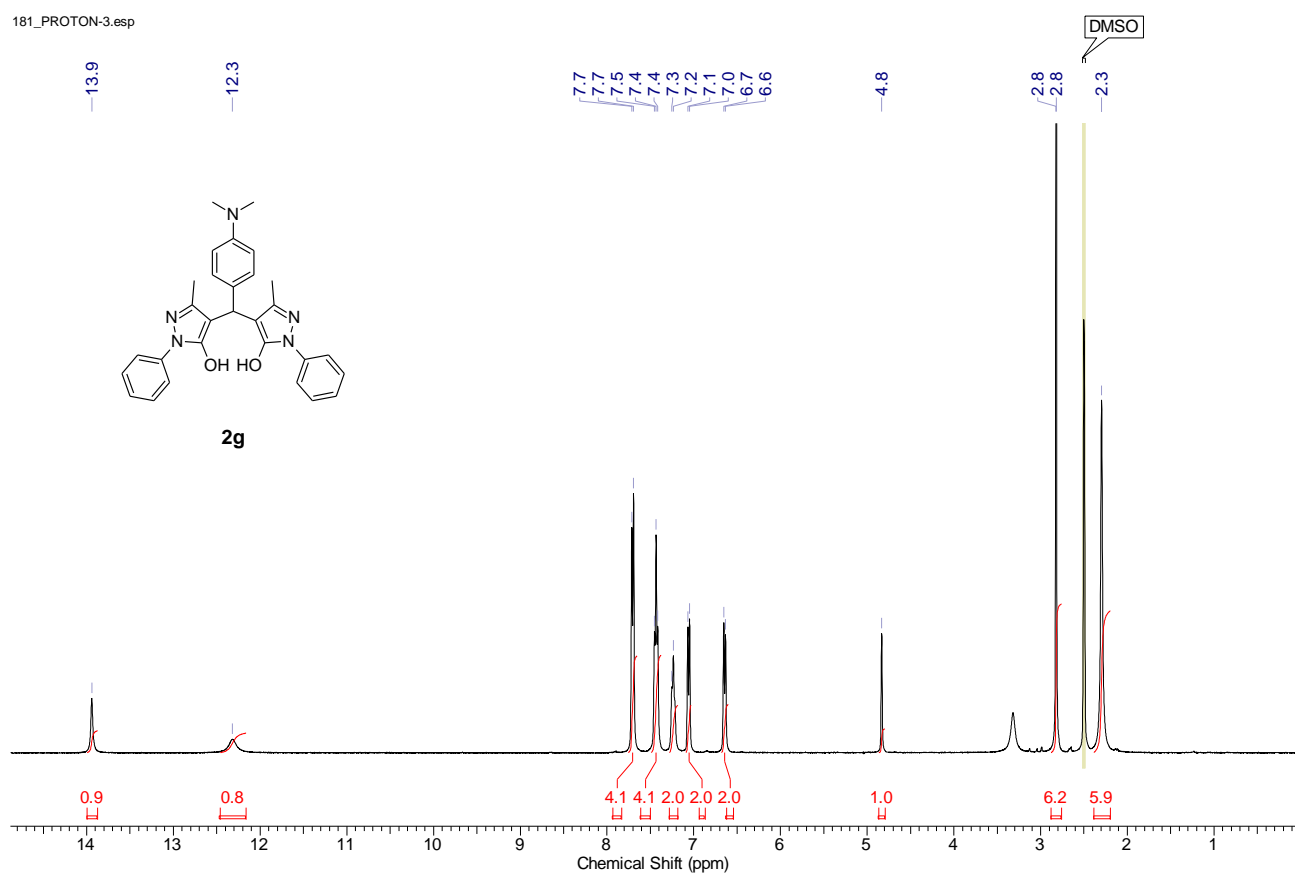

Figure S11. <sup>1</sup>H NMR spectrum of compound **2g**

JH-203-33 (1H).esp

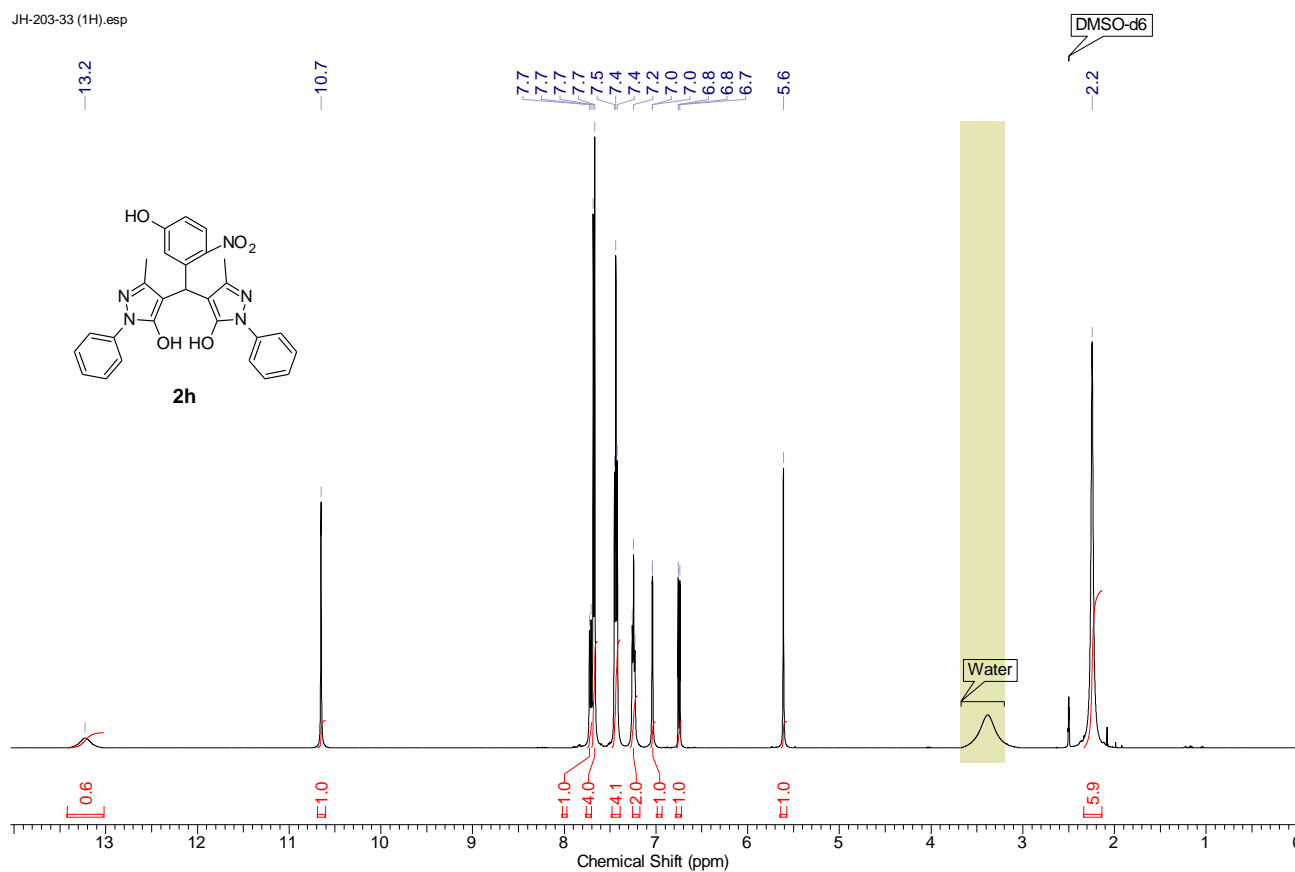

Figure S12. <sup>1</sup>H NMR spectrum of compound **2h**

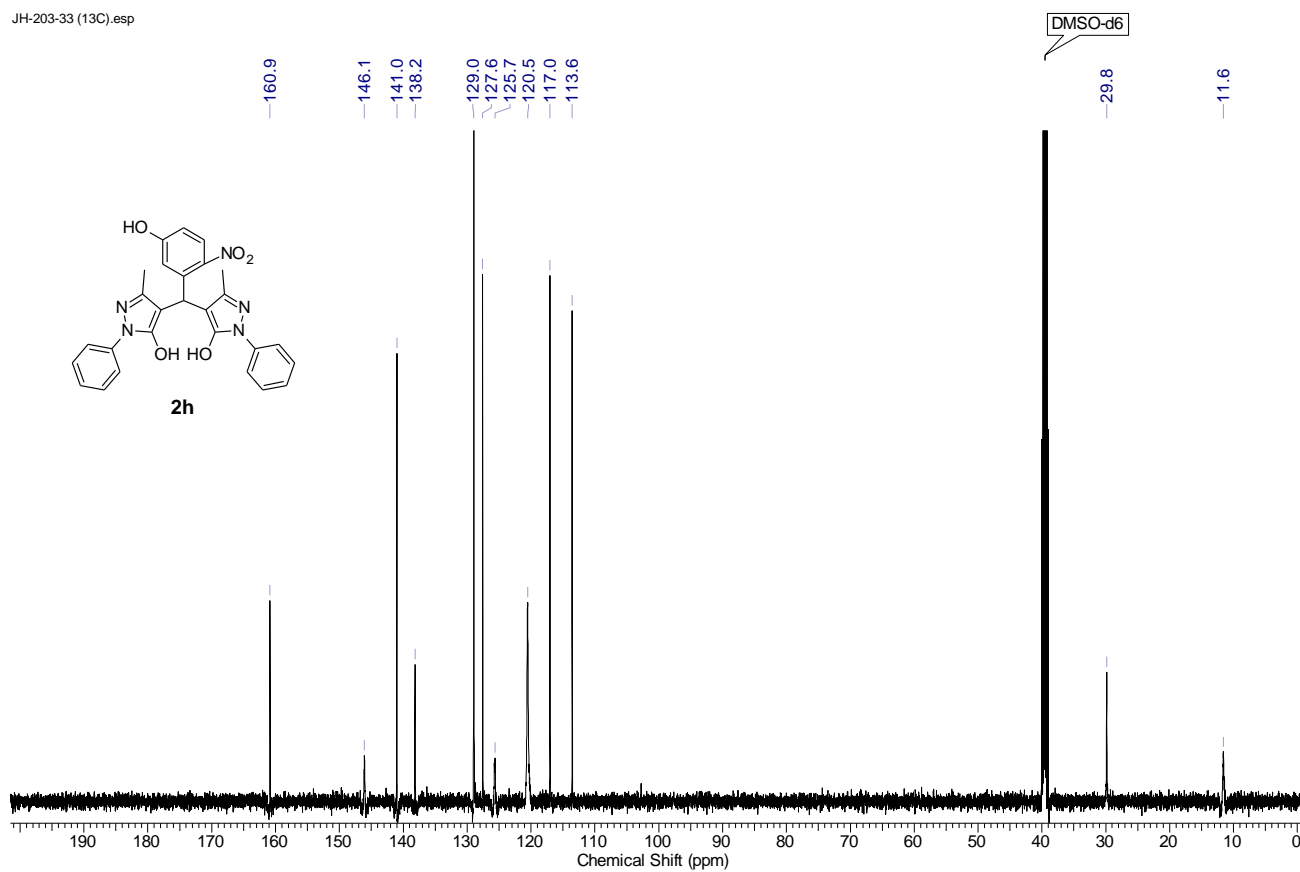Figure S13. <sup>13</sup>C NMR spectrum of compound 2h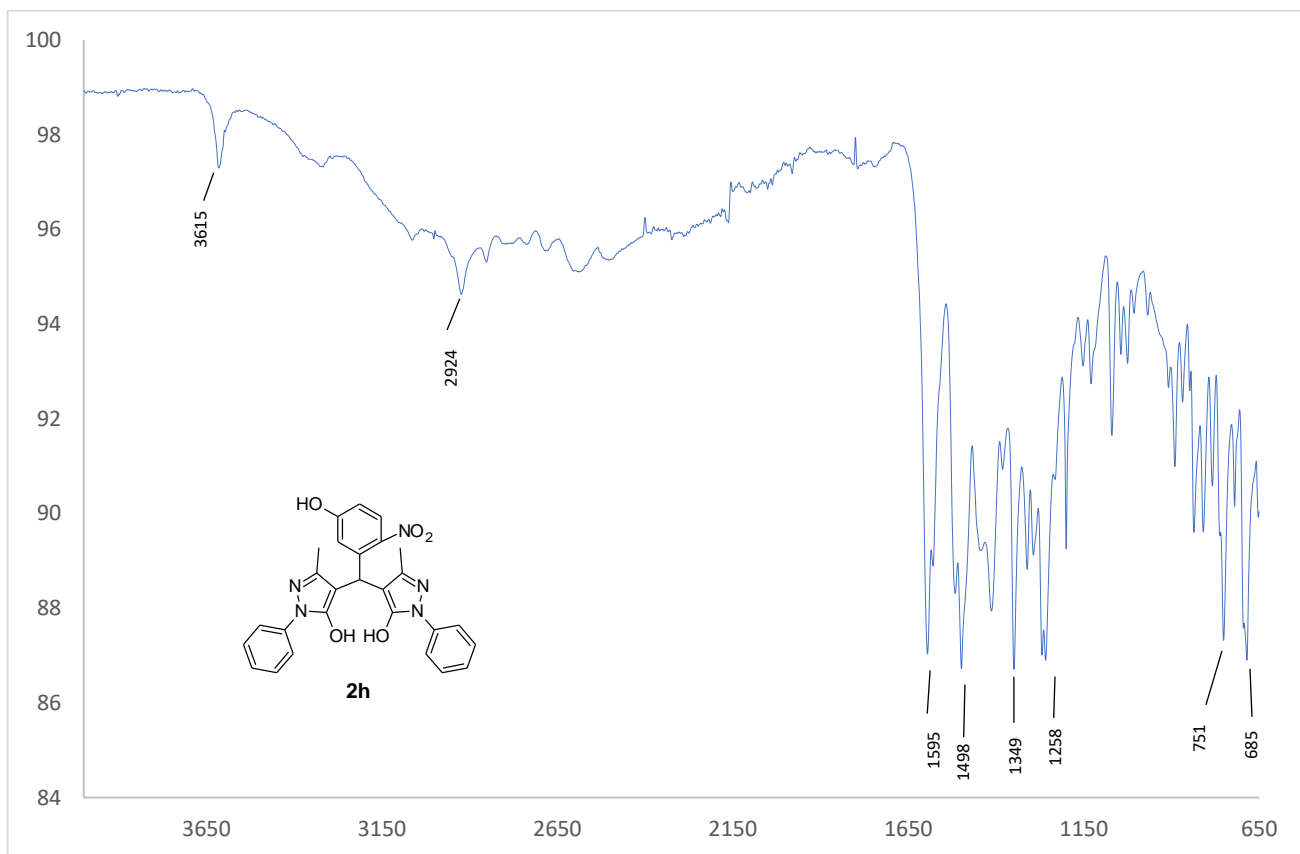

Figure S14. FTIR spectrum of compound 2h



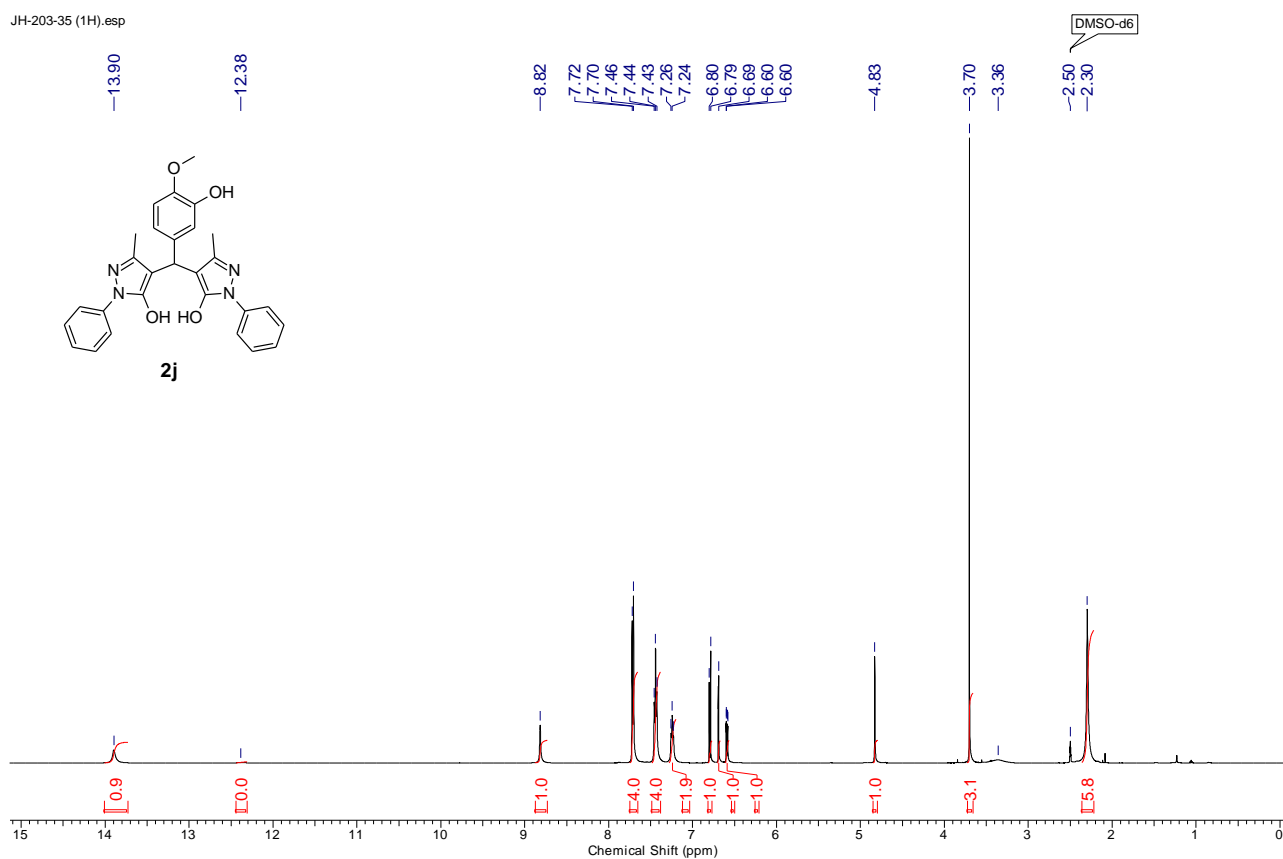Figure S17.  $^1\text{H}$  NMR spectrum of compound **2j**.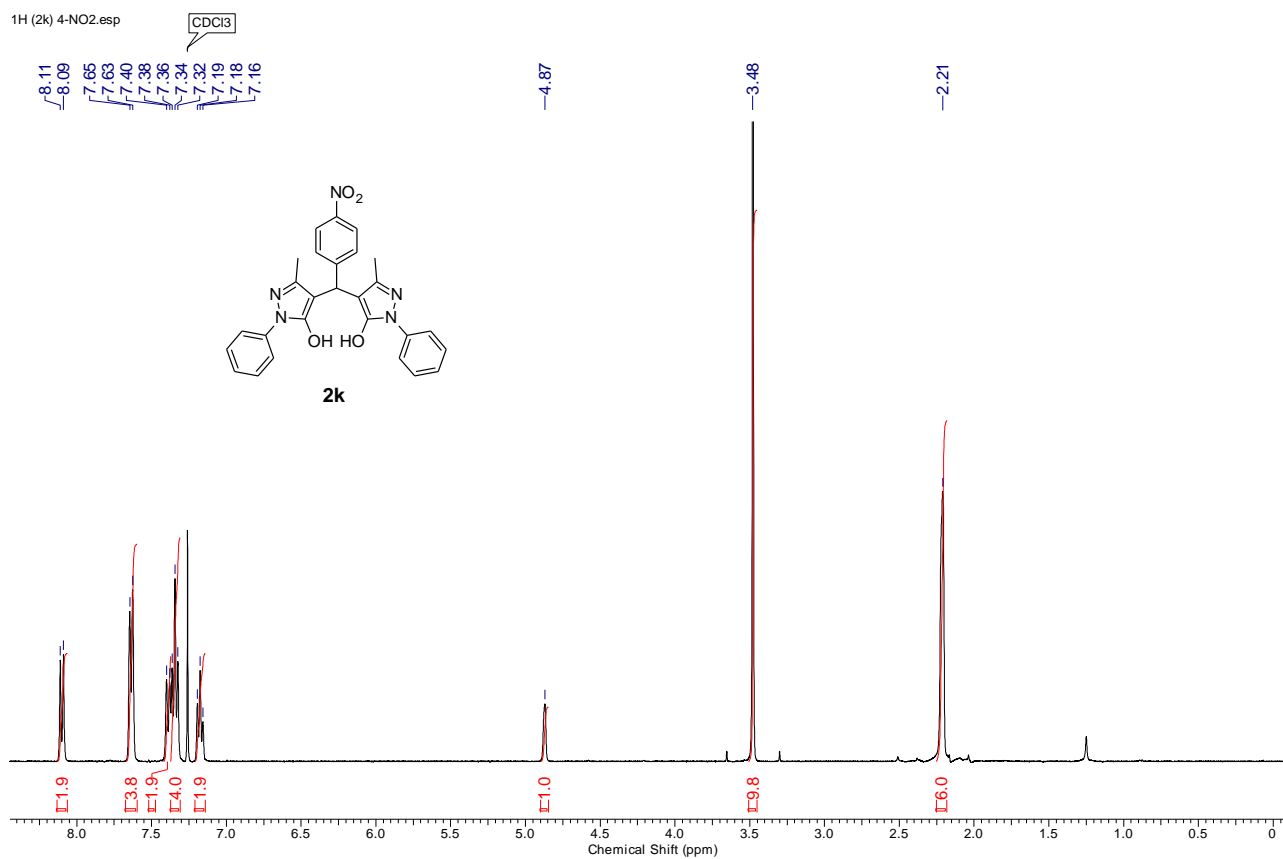Figure S18.  $^1\text{H}$  NMR spectrum of compound **2k**.

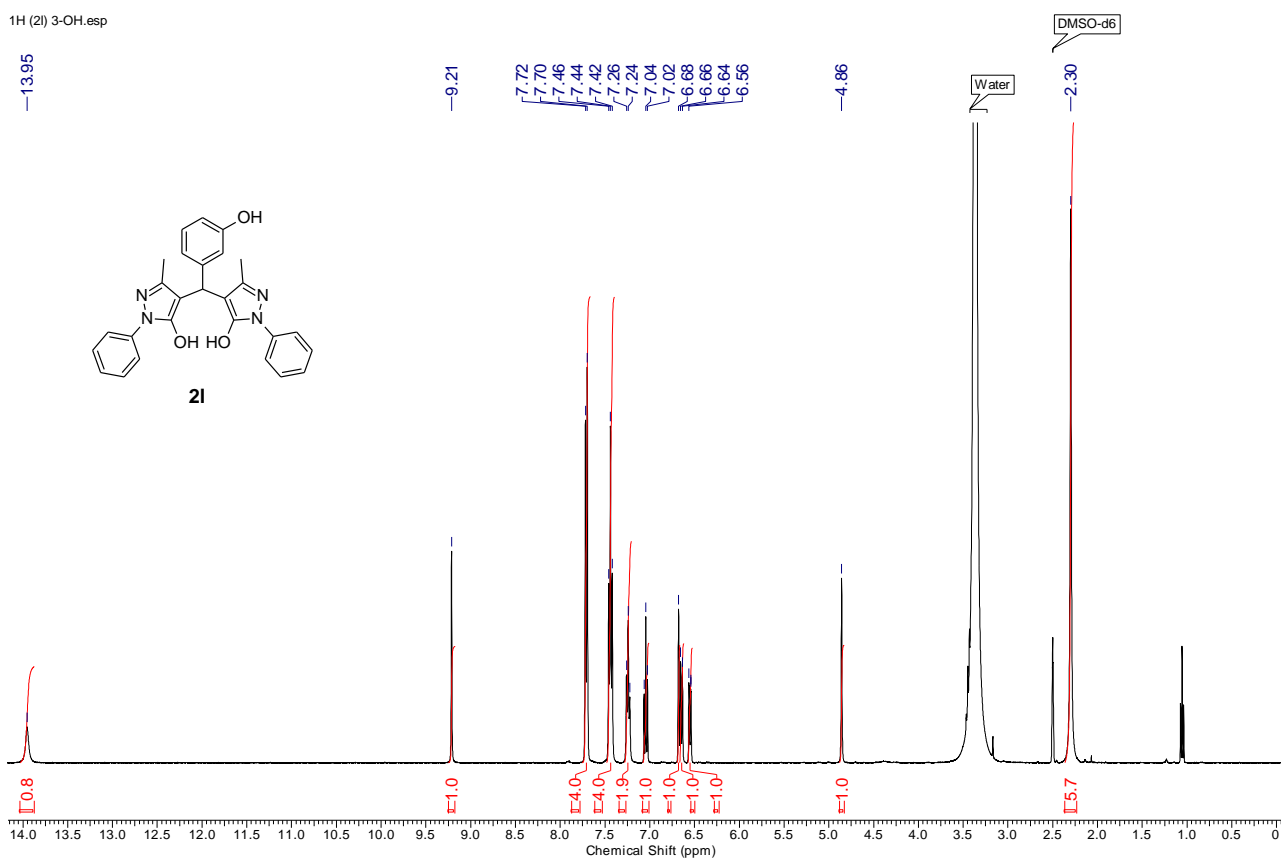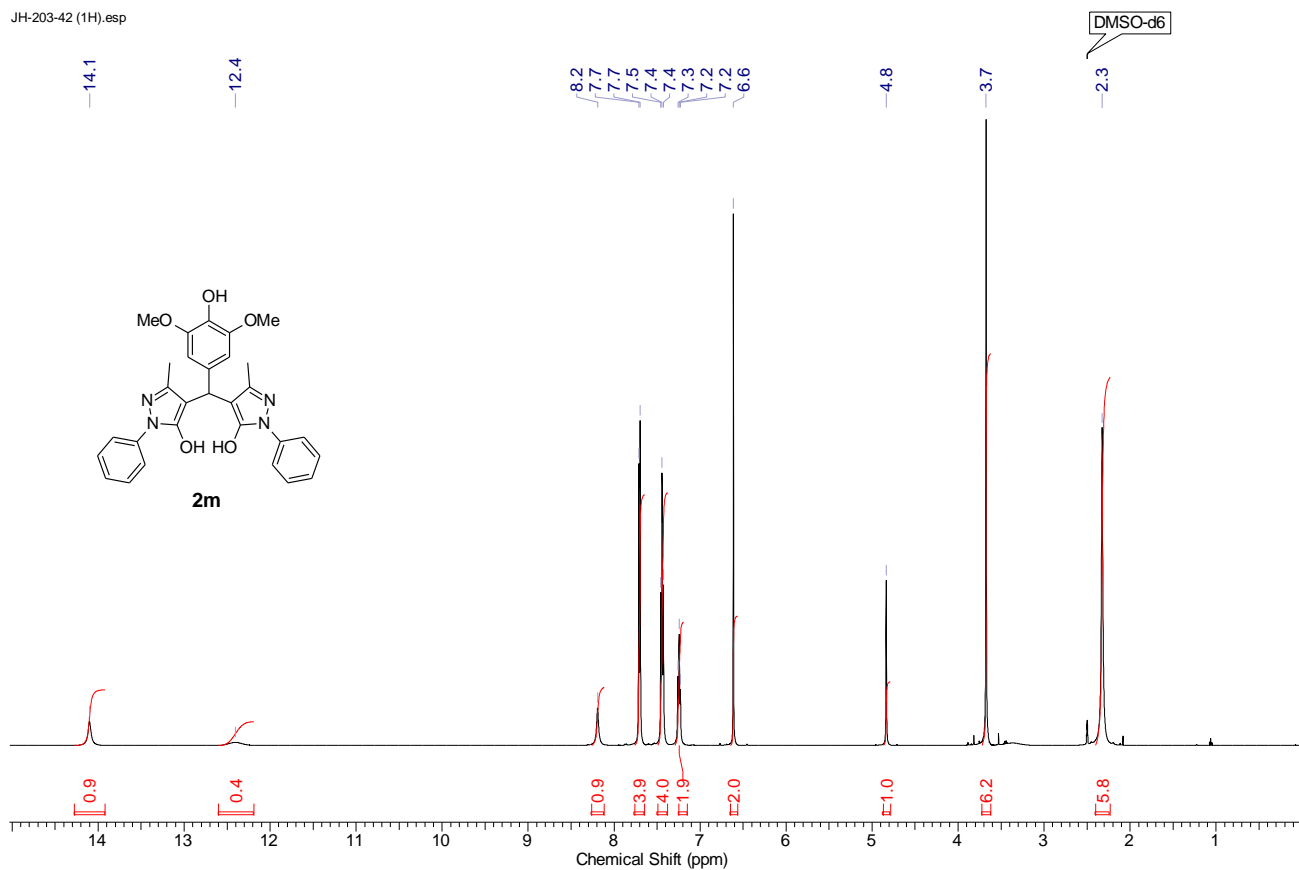

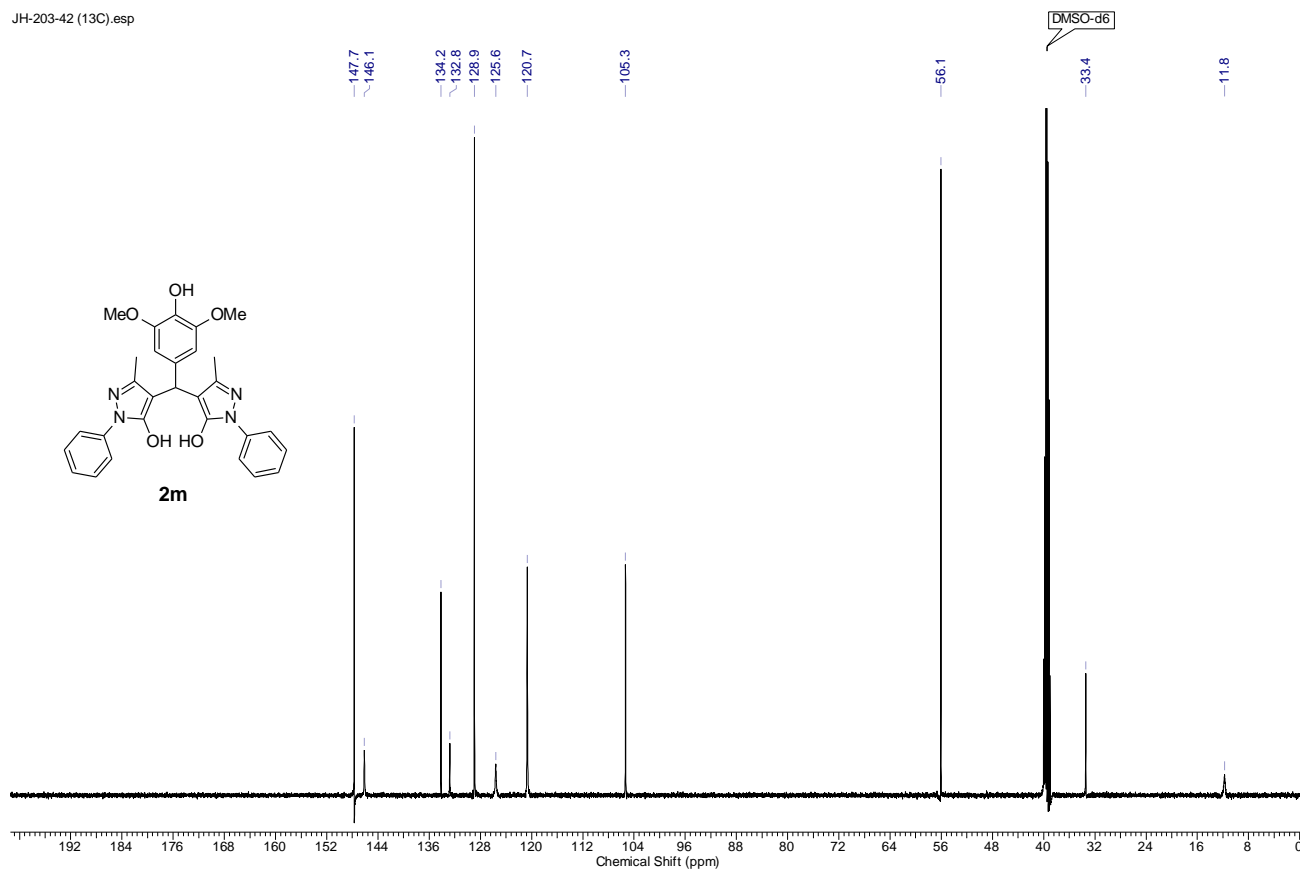Figure S21.  $^{13}\text{C}$  NMR spectrum of compound **2m**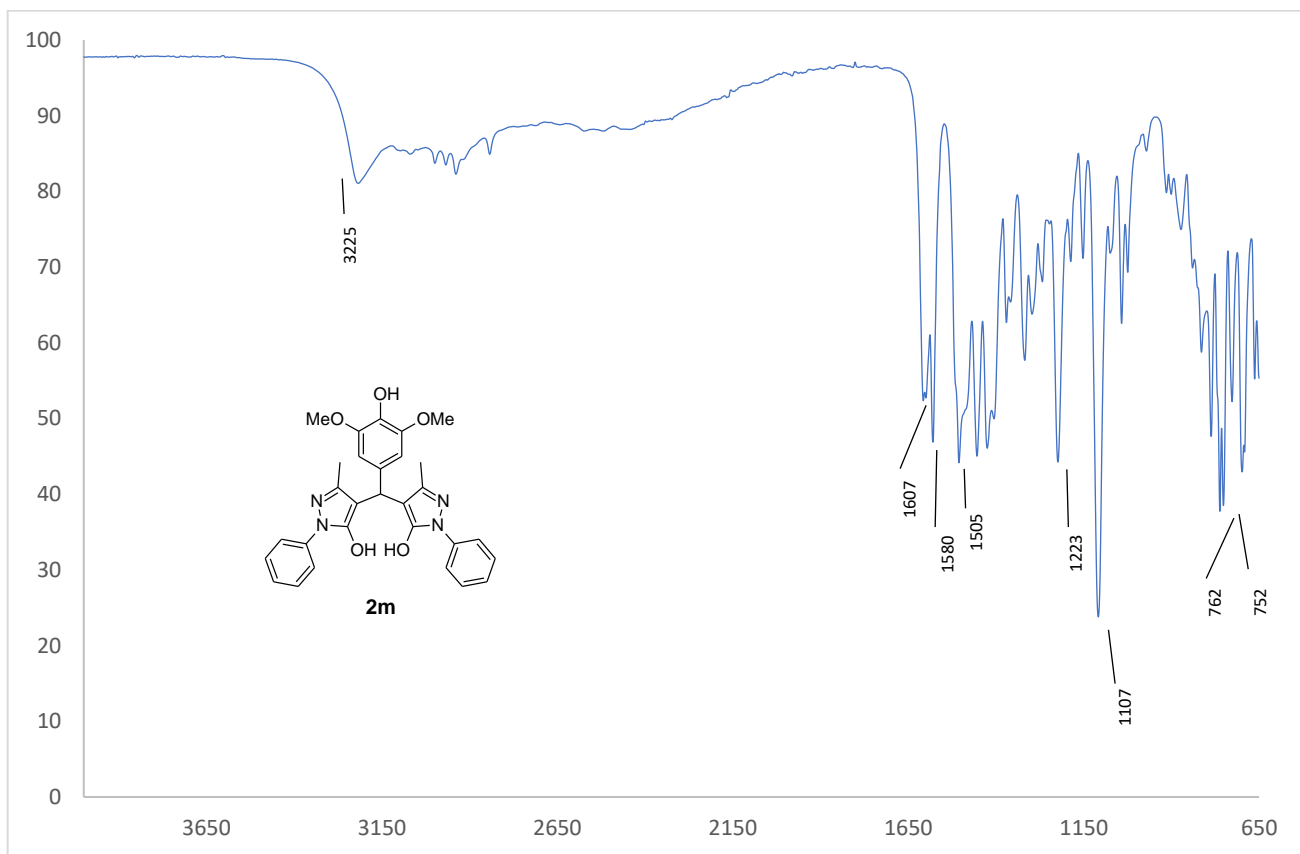Figure S22. FTIR spectrum of compound **2m**

Monoisotopic Mass, Even Electron Ions  
 118 formula(e) evaluated with 4 results within limits (up to 19 closest results for each mass)  
 Elements Used:  
 C: 0-100 H: 0-200 N: 4-4 O: 0-30  
 24-Jun-2016  
 jhm-24jun16-203-42 167 (3.089) Cn (Cen,7, 50.00, Ar); Sm (SG, 3x5.00); Sb (12,5.00)

TOF MS ES+  
 9.57e+003

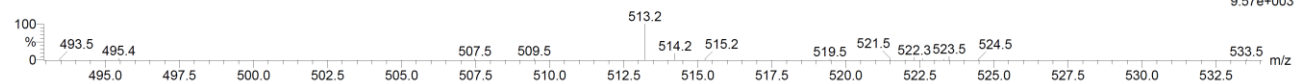

Minimum: -2.0  
 Maximum: 1000.0

| Mass     | Calc. Mass | mDa  | PPM   | DBE  | i-FIT | Formula        |
|----------|------------|------|-------|------|-------|----------------|
| 513.2136 | 513.2138   | -0.2 | -0.4  | 17.5 | 539.1 | C29 H29 N4 O5  |
|          | 513.2079   | 5.7  | 11.1  | 26.5 | 942.9 | C36 H25 N4     |
|          | 513.2197   | -6.1 | -11.9 | 8.5  | 222.9 | C22 H33 N4 O10 |
|          | 513.2044   | 9.2  | 17.9  | 4.5  | 125.0 | C18 H33 N4 O13 |

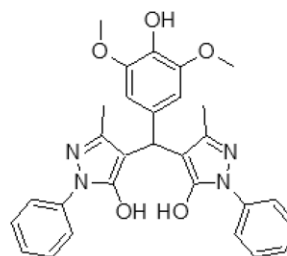

Molecular Formula = C<sub>29</sub>H<sub>28</sub>N<sub>4</sub>O<sub>5</sub>  
 [M+H]<sup>+</sup> = 513.213246 Da

Figure S23. HRMS spectrum of compound 2m

<sup>1</sup>H (2n) 3,4-diOH.esp

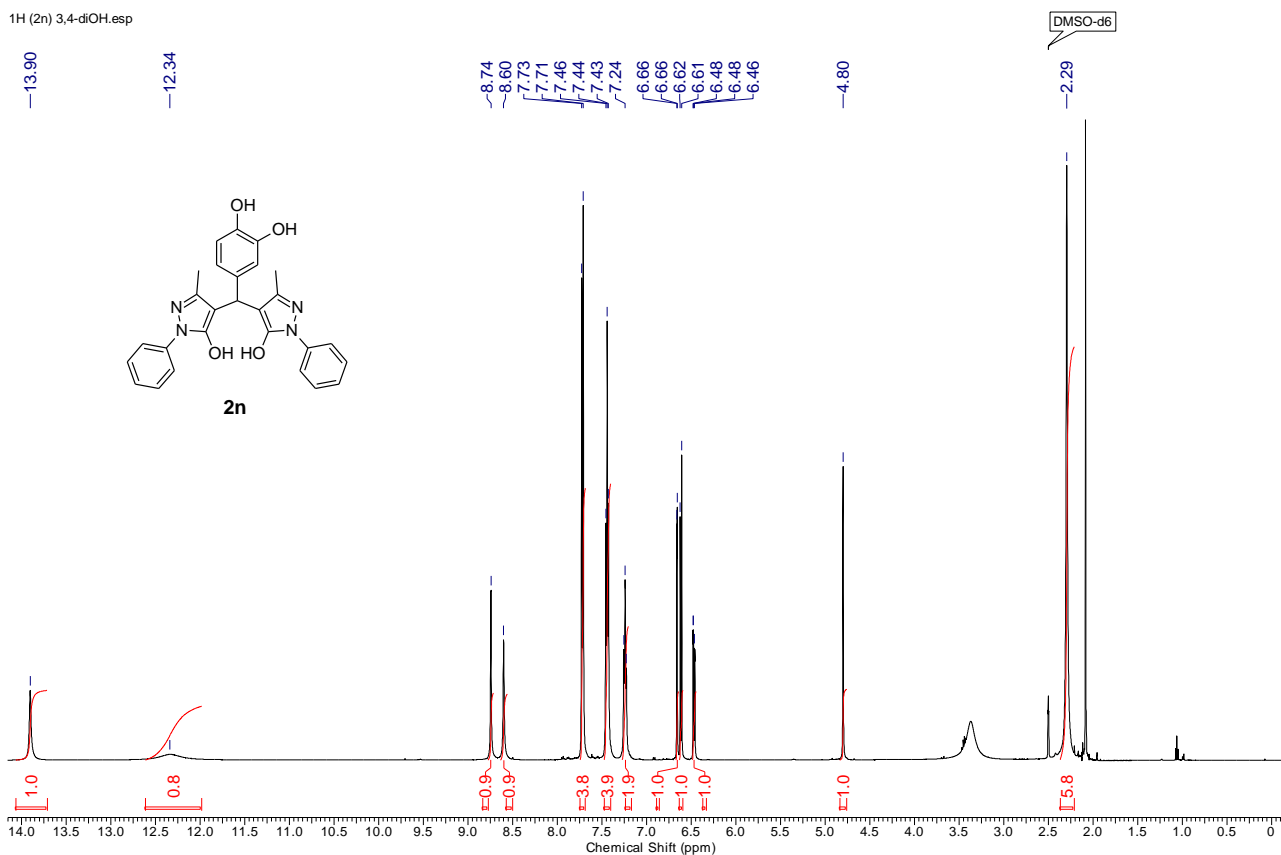

Figure S24. <sup>1</sup>H NMR spectrum of compound 2n.



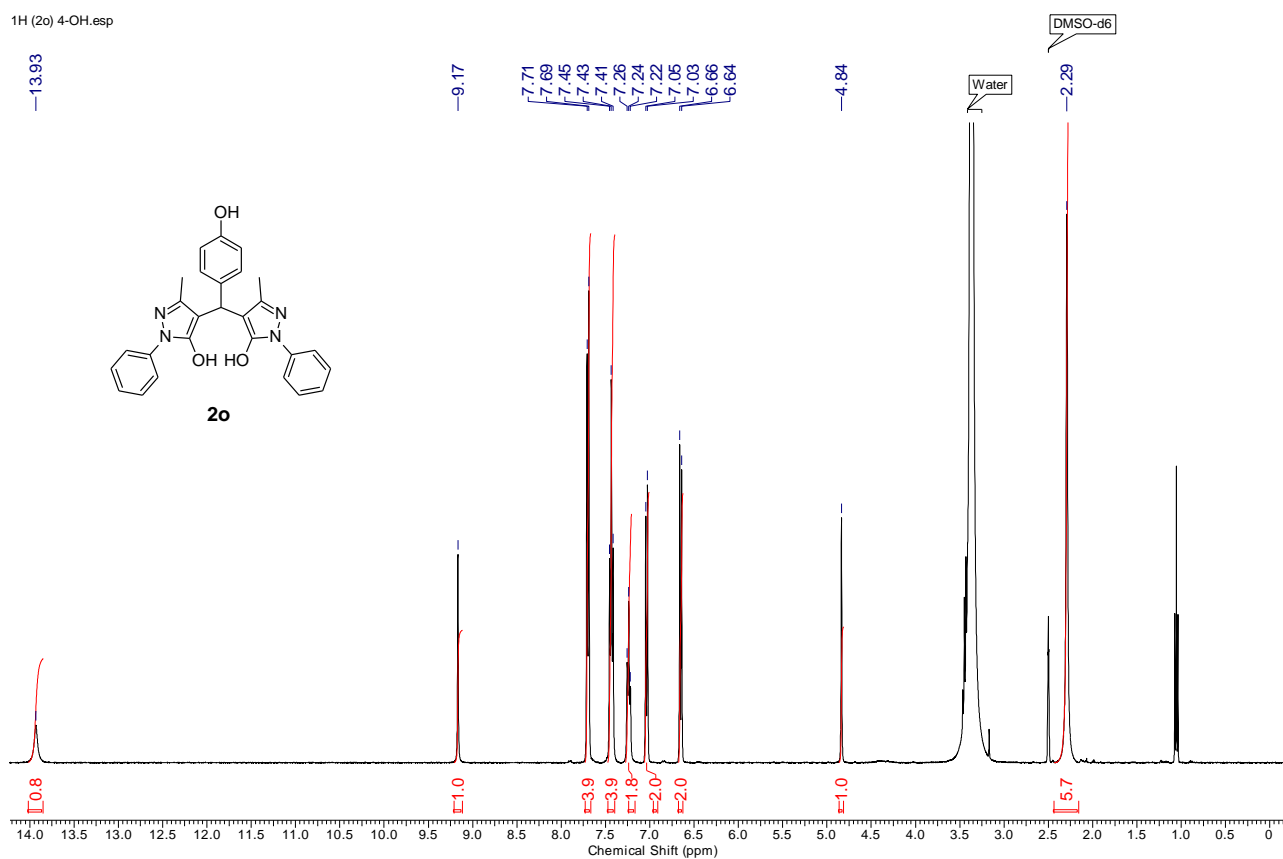

Figure S25. <sup>1</sup>H NMR spectrum of compound **2o**.

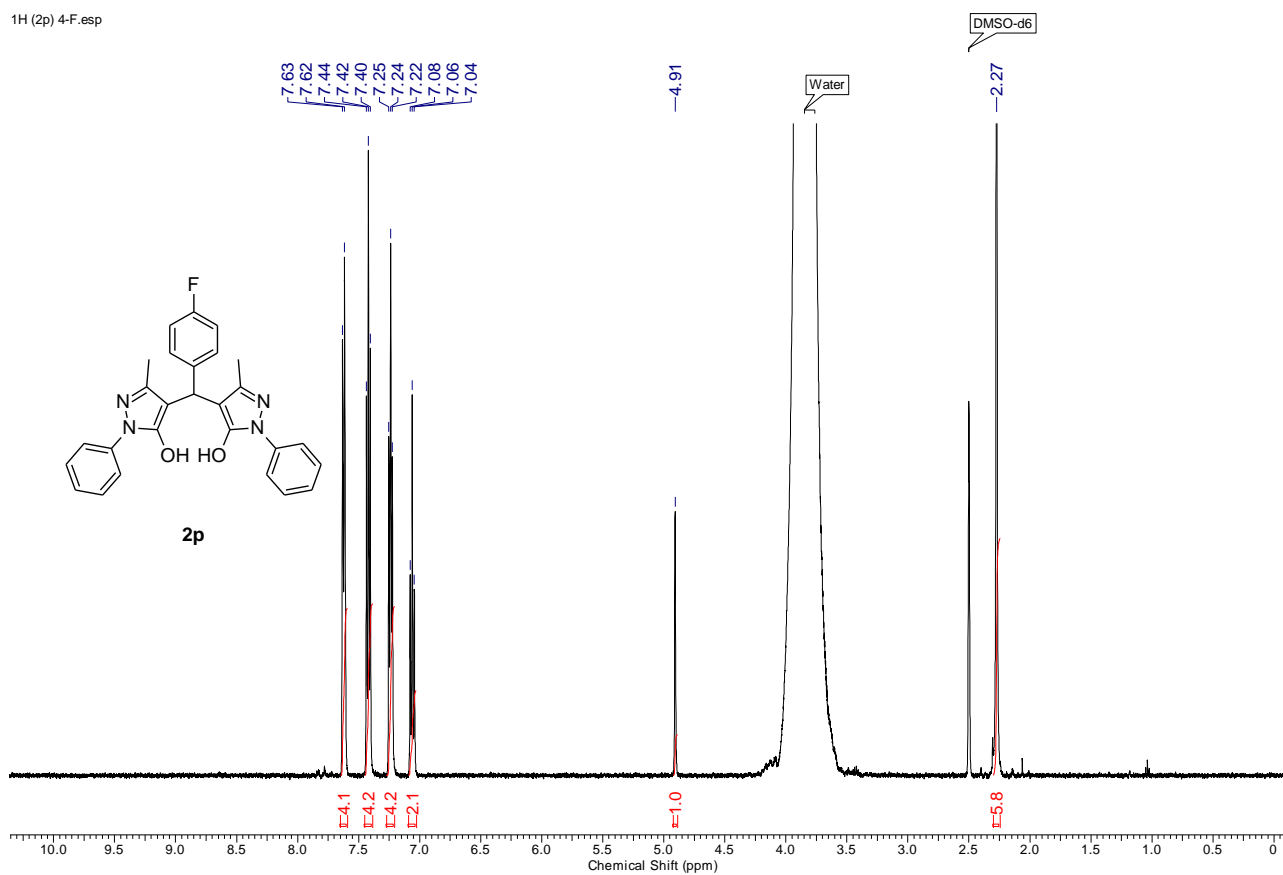

Figure S26. <sup>1</sup>H NMR spectrum of compound **2p**.

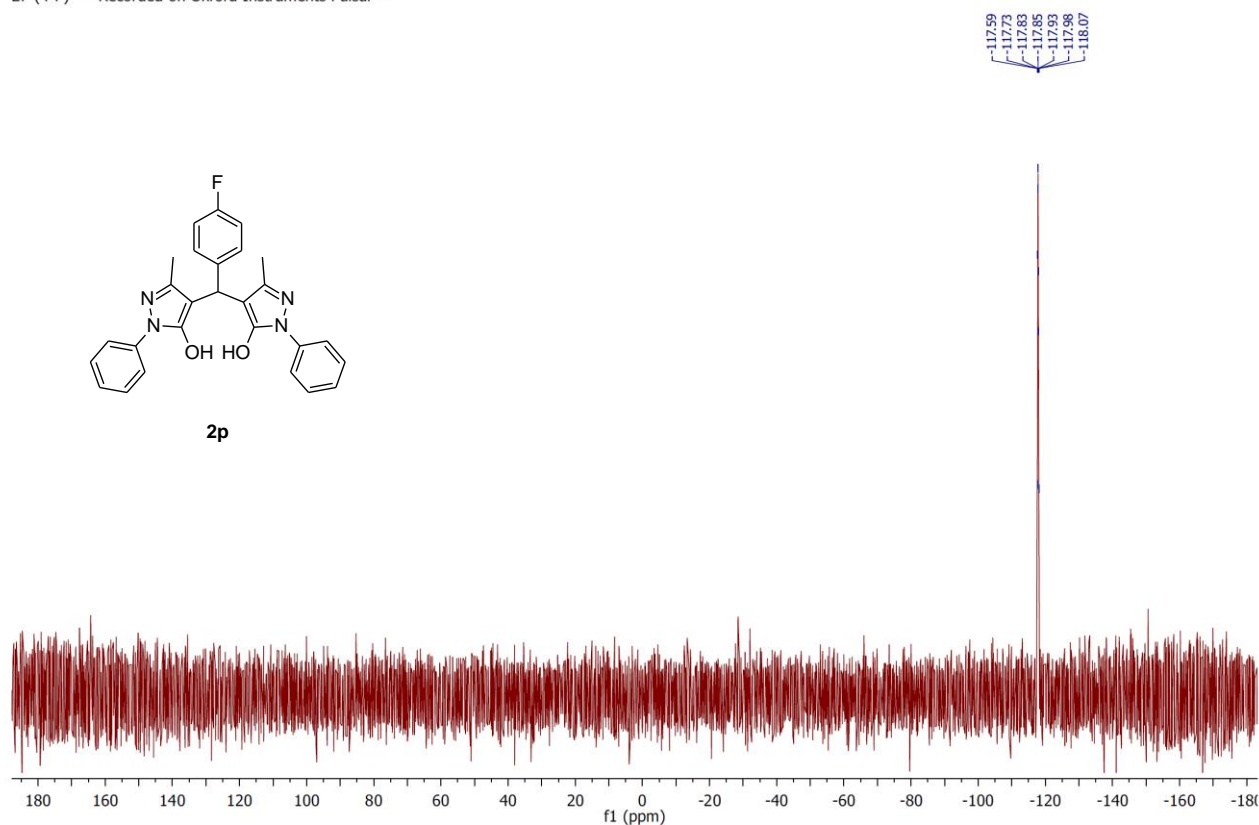

Figure S27.  $^{19}\text{F}$  NMR spectrum of compound **2p**.

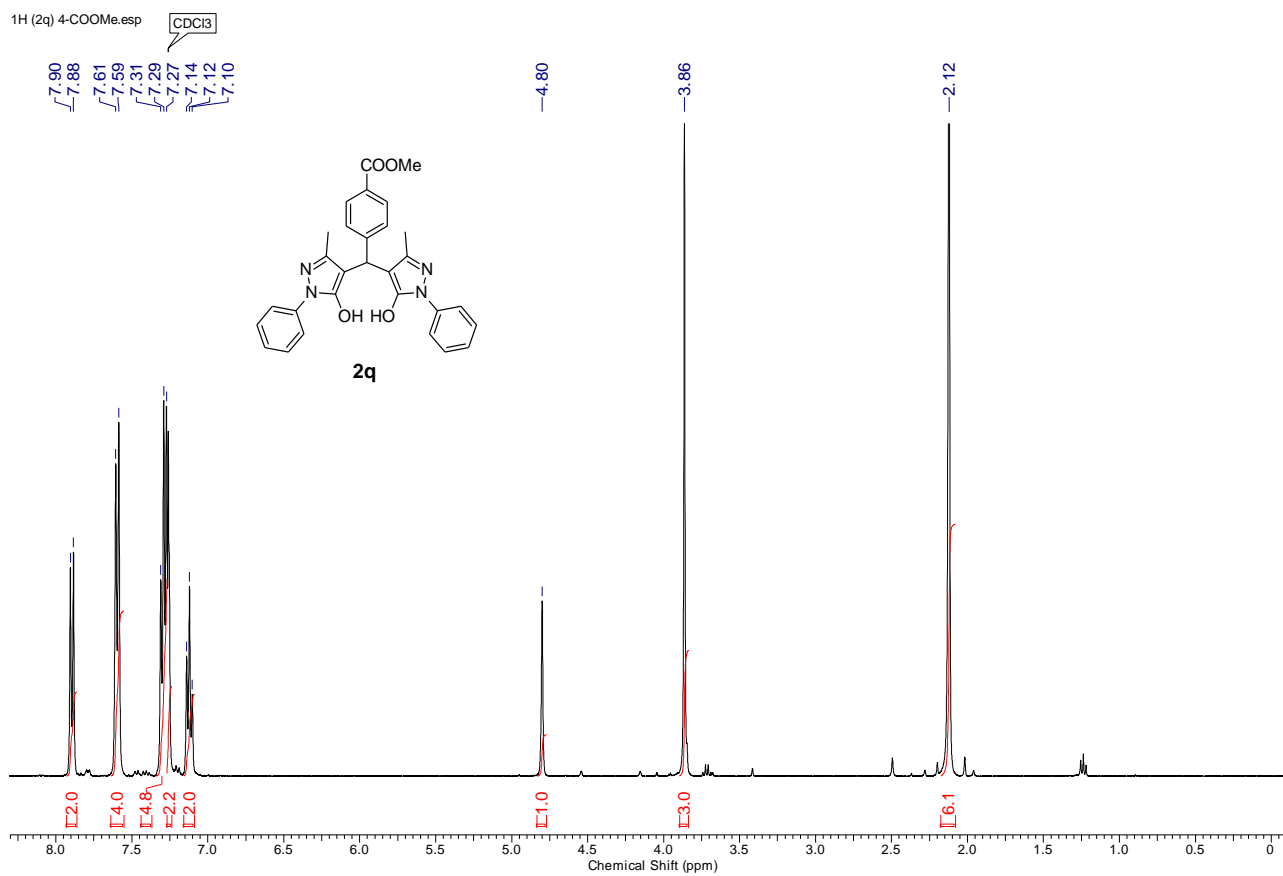

Figure S28.  $^1\text{H}$  NMR spectrum of compound **2q**.

1H (2r) 4-CF3.esp

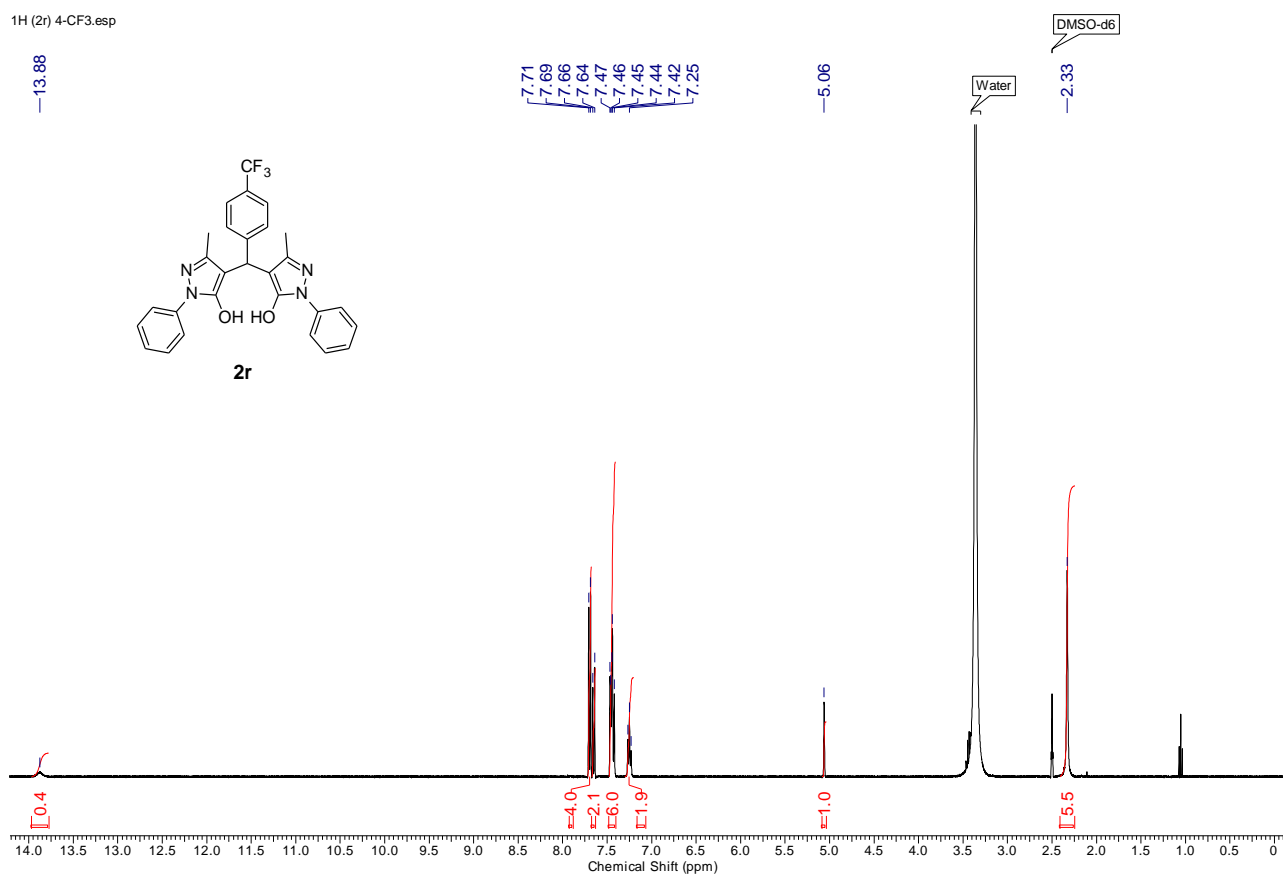

Figure S29. <sup>1</sup>H NMR spectrum of compound **2r**.

1H (2s) 500 MHz.esp

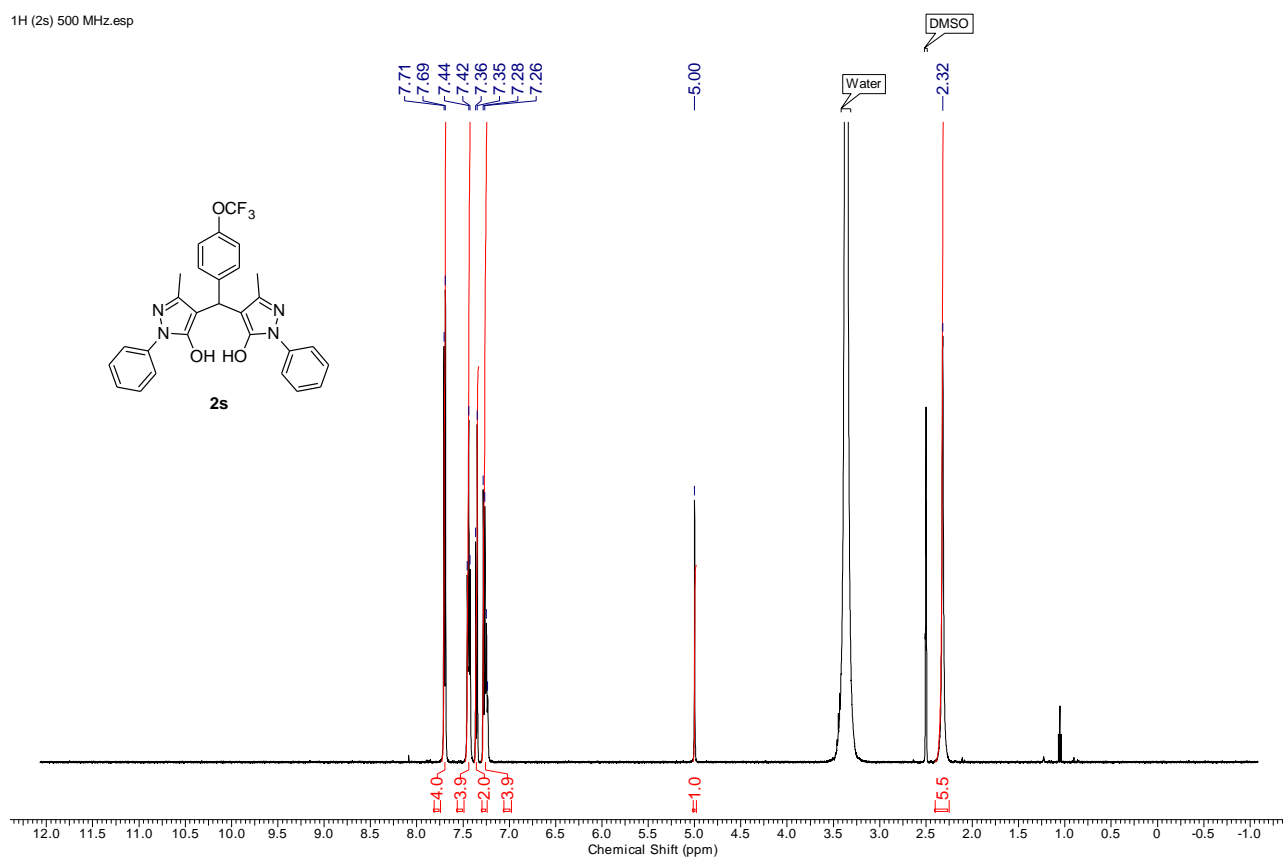

Figure S30. <sup>1</sup>H NMR spectrum of compound **2s**.

1H (2t) 3-F.esp

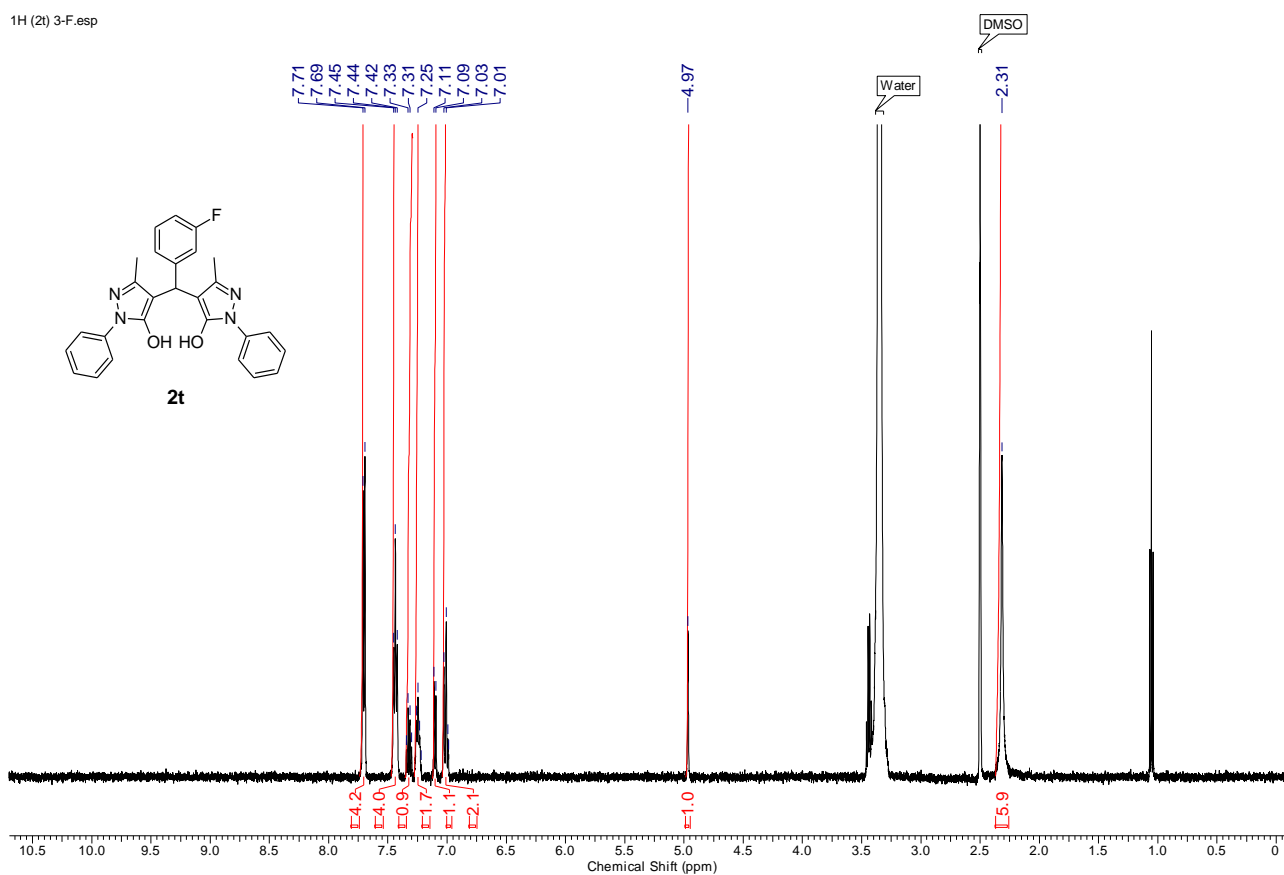

Figure S31. <sup>1</sup>H NMR spectrum of compound **2t**.

1H (2u) 4-SMe.esp

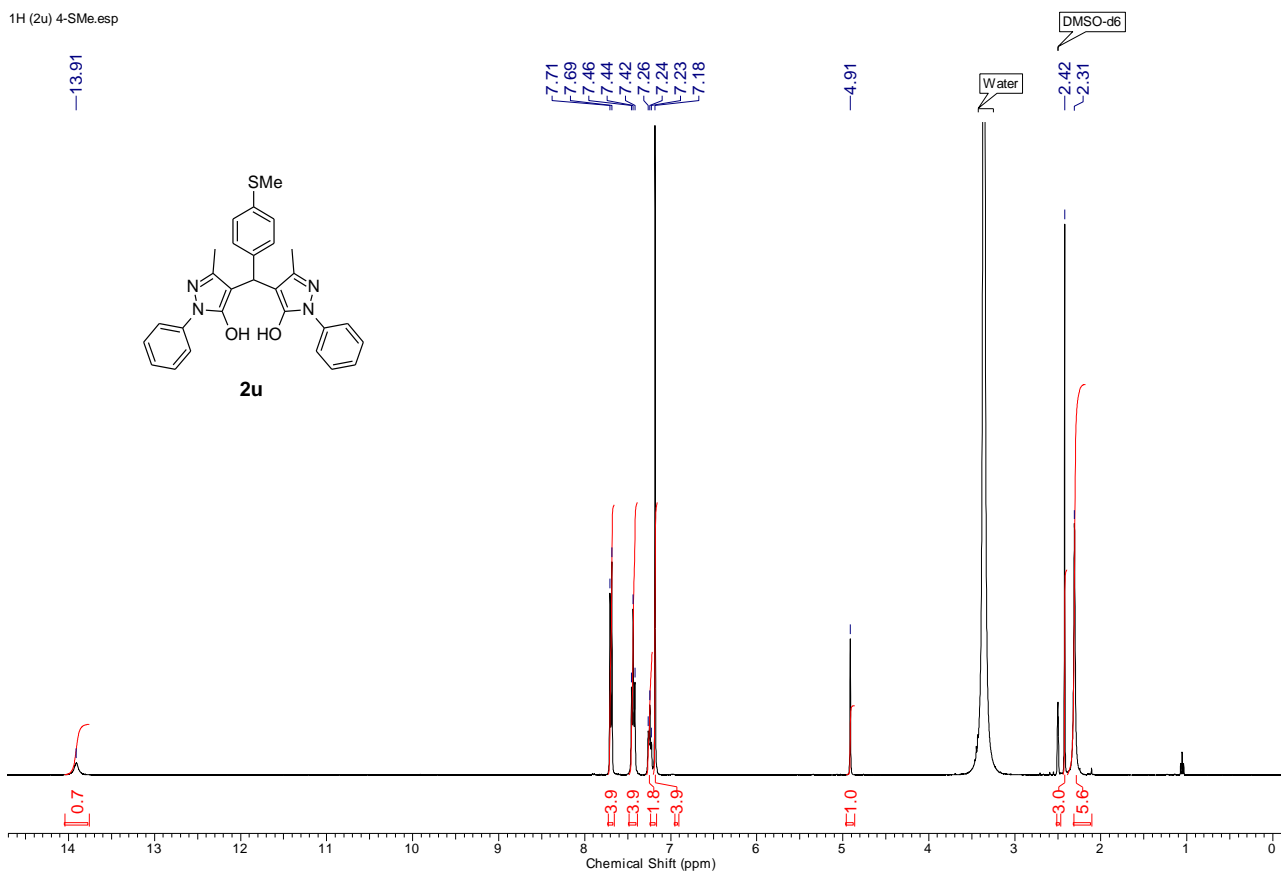

Figure S32. <sup>1</sup>H NMR spectrum of compound **2u**.

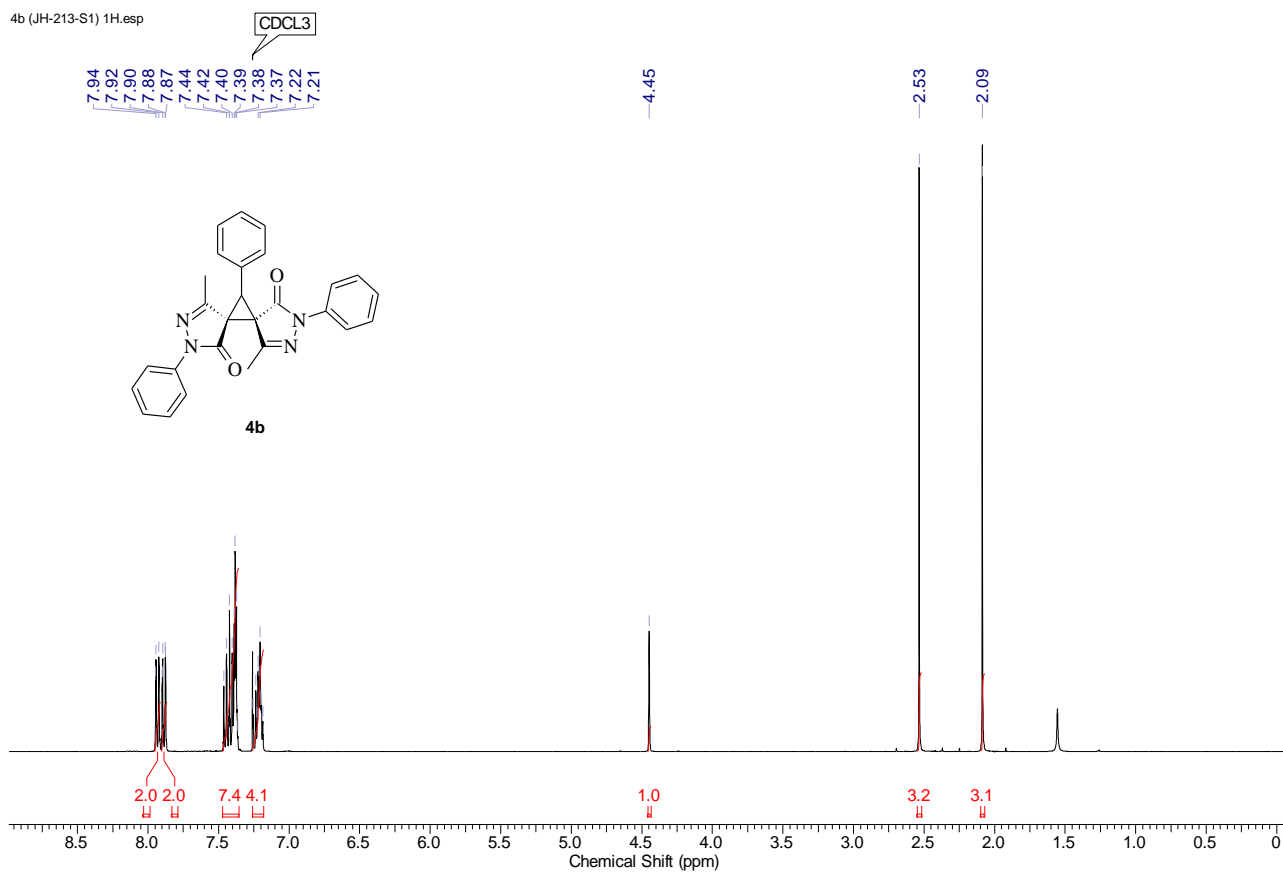

Figure S33. <sup>1</sup>H NMR spectrum of compound 4b

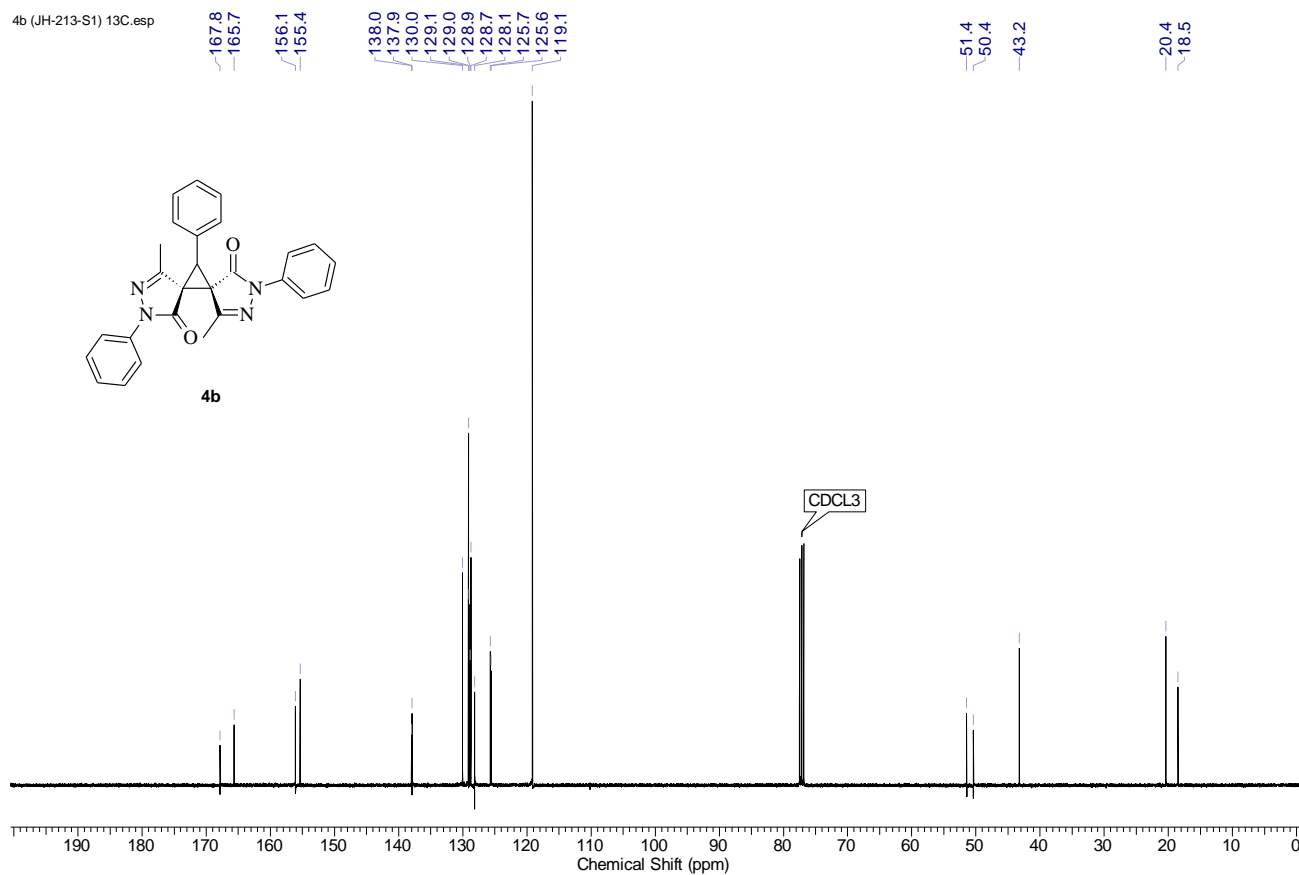

Figure S34. <sup>13</sup>C NMR spectrum of compound 4b

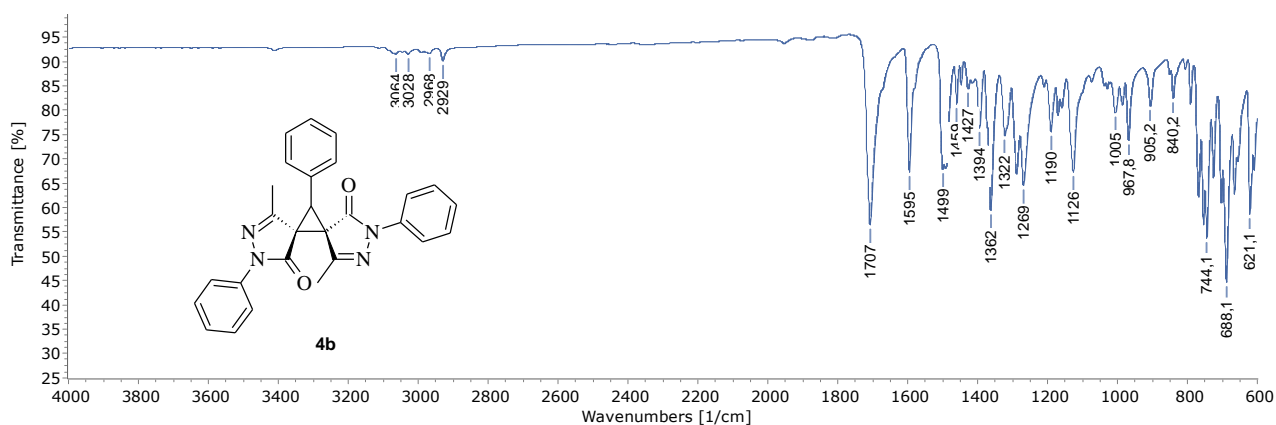

Figure S35. FTIR spectrum of compound **4b**

#### Acquisition Parameter

|                   |                |              |           |                          |         |
|-------------------|----------------|--------------|-----------|--------------------------|---------|
| Ion Source Type   | ESI            | Ion Polarity | Positive  | Alternating Ion Polarity | off     |
| Mass Range Mode   | UltraScan      | Scan Begin   | 70 m/z    | Scan End                 | 450 m/z |
| Accumulation Time | 200000 $\mu$ s | RF Level     | 63 %      | Trap Drive               | 54.1    |
| SPS Target Mass   | 400 m/z        | Averages     | 5 Spectra | n/a                      | n/a     |

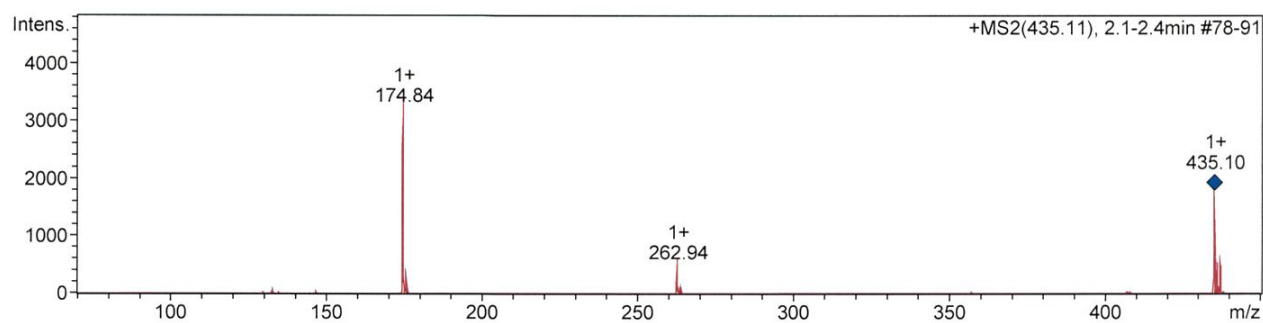

| Component | Molecular Mass | Molecule | Absolute Abundance   | Relative Abundance |        |
|-----------|----------------|----------|----------------------|--------------------|--------|
| A         | 174.84         | 174.93   | [M + H] <sup>+</sup> | 3230               | 100.00 |
| B         | 435.11         | 435.30   | [M + H] <sup>+</sup> | 1784               | 55.22  |
| C         | 262.94         | 263.10   | [M + H] <sup>+</sup> | 521                | 16.14  |

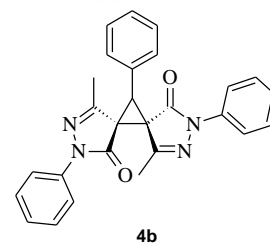

Figure S36. ESI-MS spectrum of compound **4b**

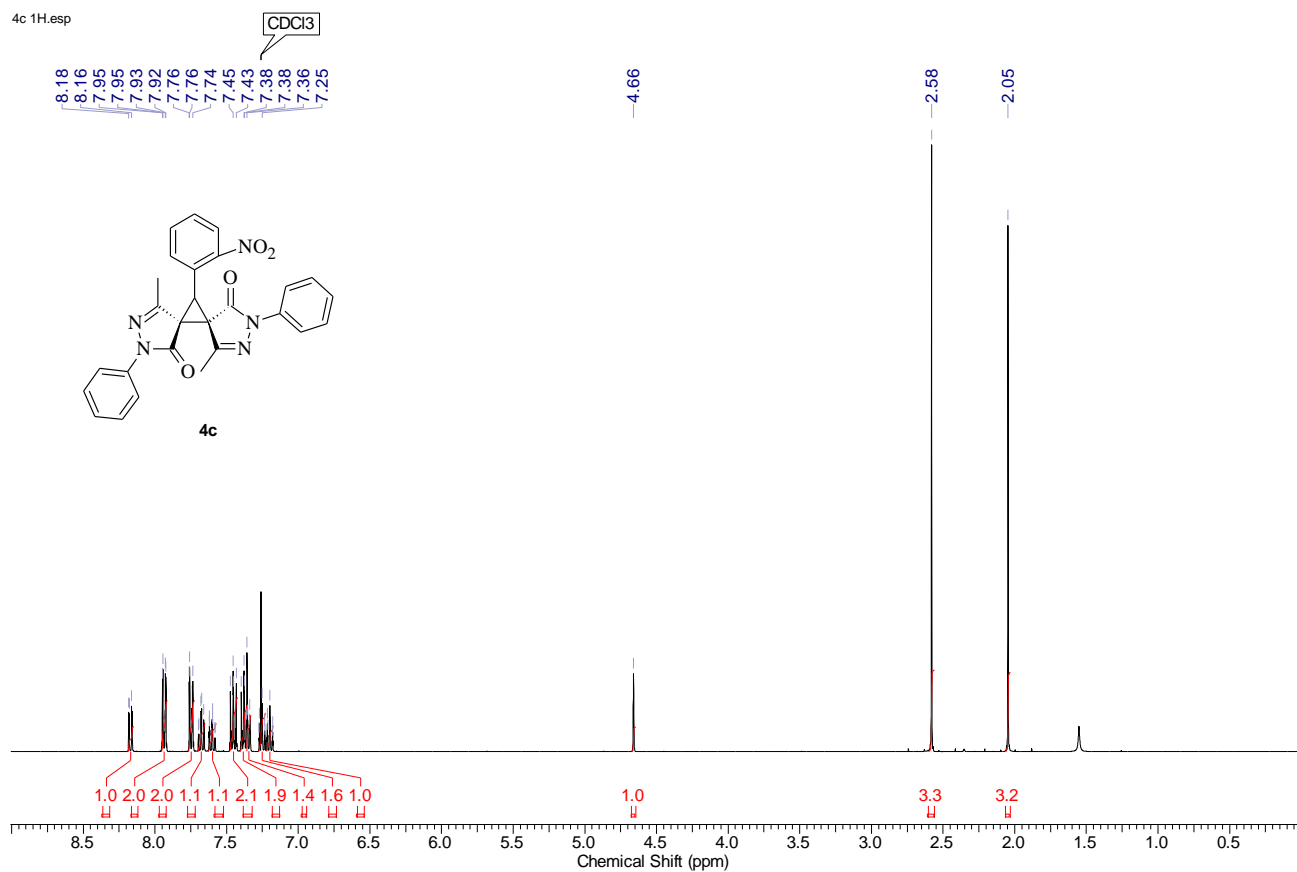

Figure S37. <sup>1</sup>H NMR spectrum of compound 4c

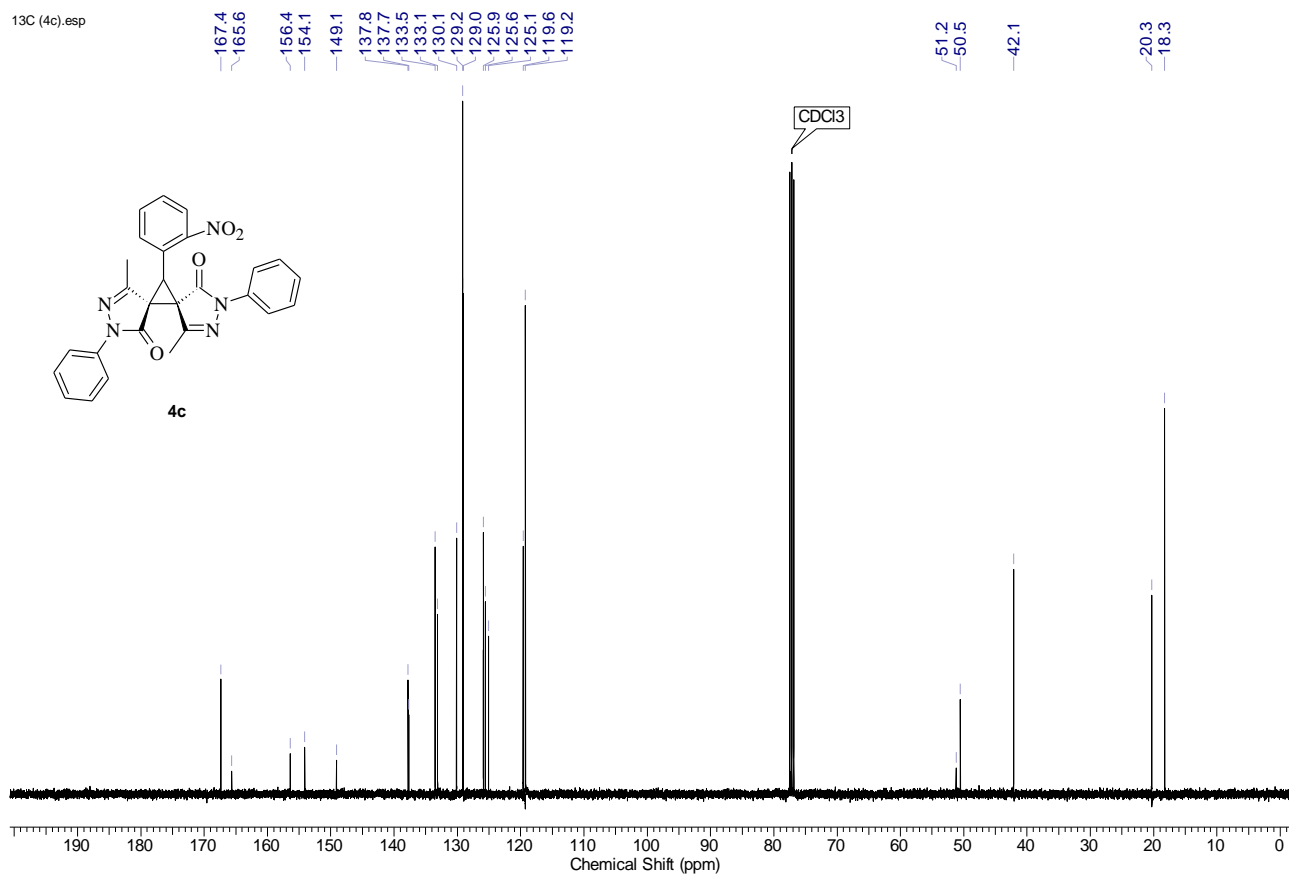

Figure S38. <sup>13</sup>C NMR spectrum of compound 4c

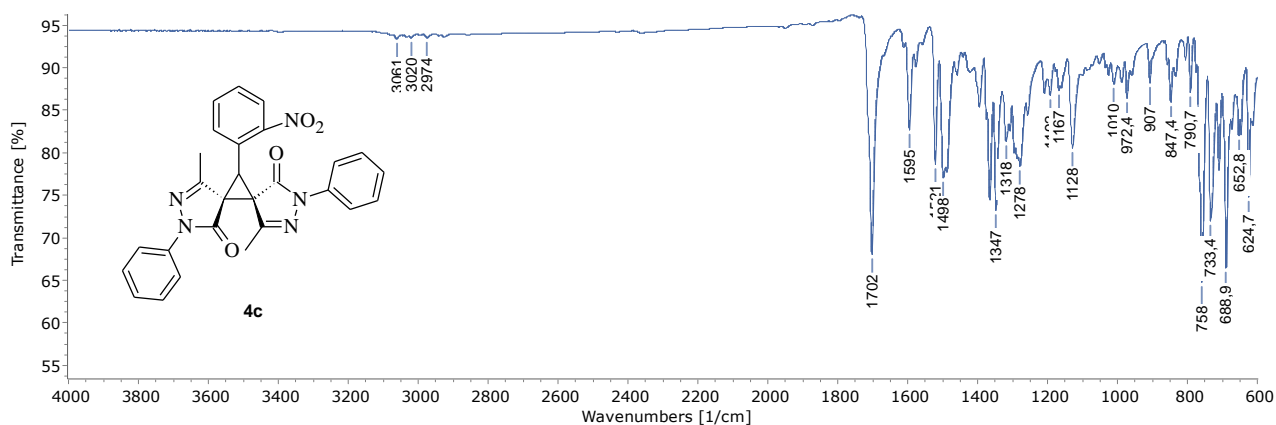

Figure S39. FTIR spectrum of compound **4c**

#### Acquisition Parameter

|                   |                |              |           |                          |         |
|-------------------|----------------|--------------|-----------|--------------------------|---------|
| Ion Source Type   | ESI            | Ion Polarity | Positive  | Alternating Ion Polarity | off     |
| Mass Range Mode   | UltraScan      | Scan Begin   | 70 m/z    | Scan End                 | 600 m/z |
| Accumulation Time | 200000 $\mu$ s | RF Level     | 63 %      | Trap Drive               | 54.1    |
| SPS Target Mass   | 400 m/z        | Averages     | 5 Spectra | n/a                      | n/a     |

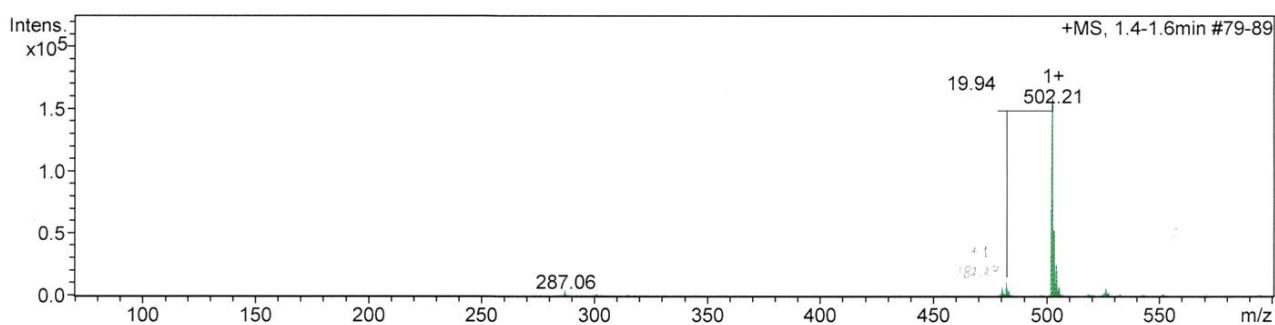

| Component | Molecular Mass | Molecule | Absolute Abundance   | Relative Abundance |
|-----------|----------------|----------|----------------------|--------------------|
| A         | 502.18         | 502.66   | [M + H] <sup>+</sup> | 150245             |
| B         | 482.27         | 482.67   | [M + H] <sup>+</sup> | 8078               |

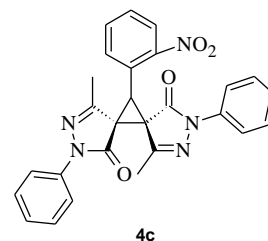

Figure S40. ESI-MS spectrum of compound **4c**



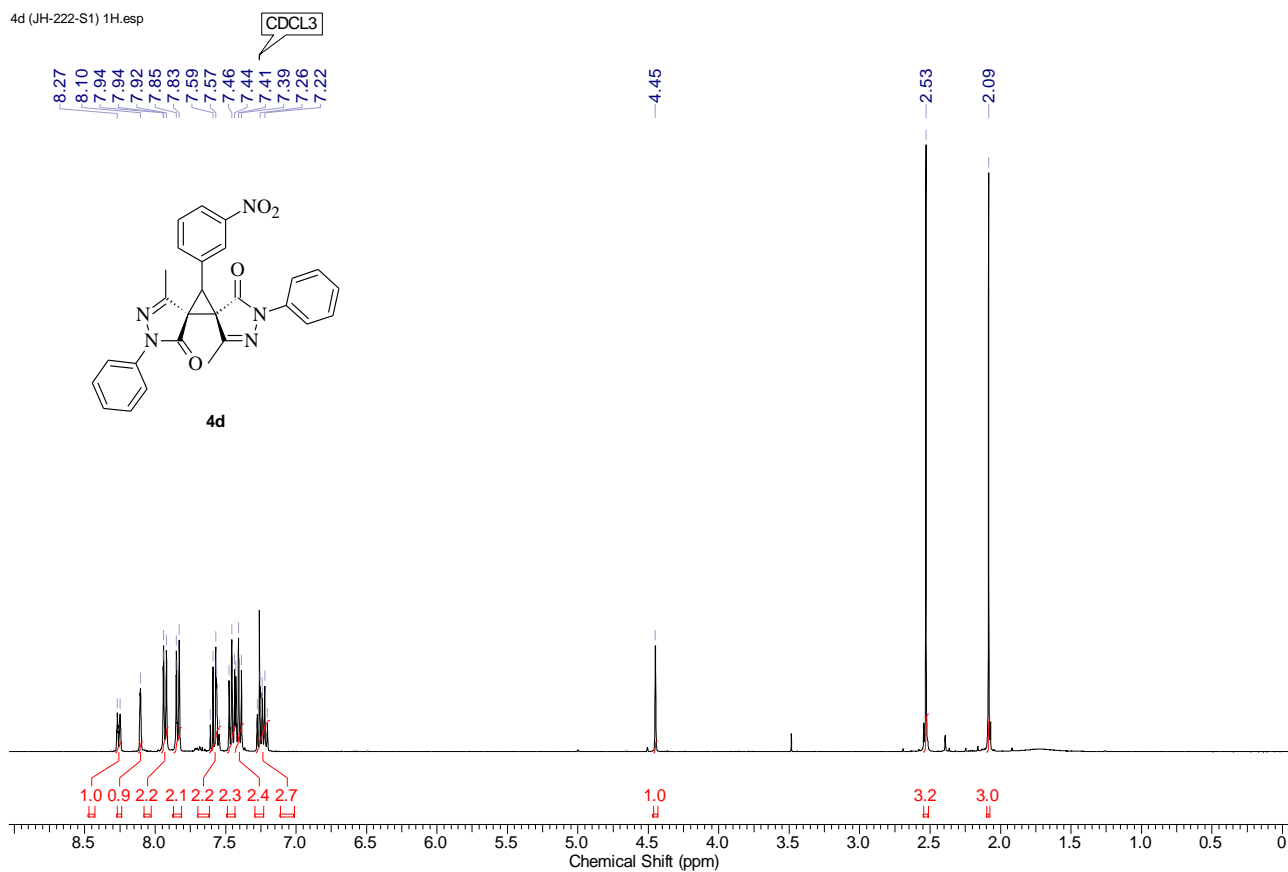

Figure S41. <sup>1</sup>H NMR spectrum of compound **4d**

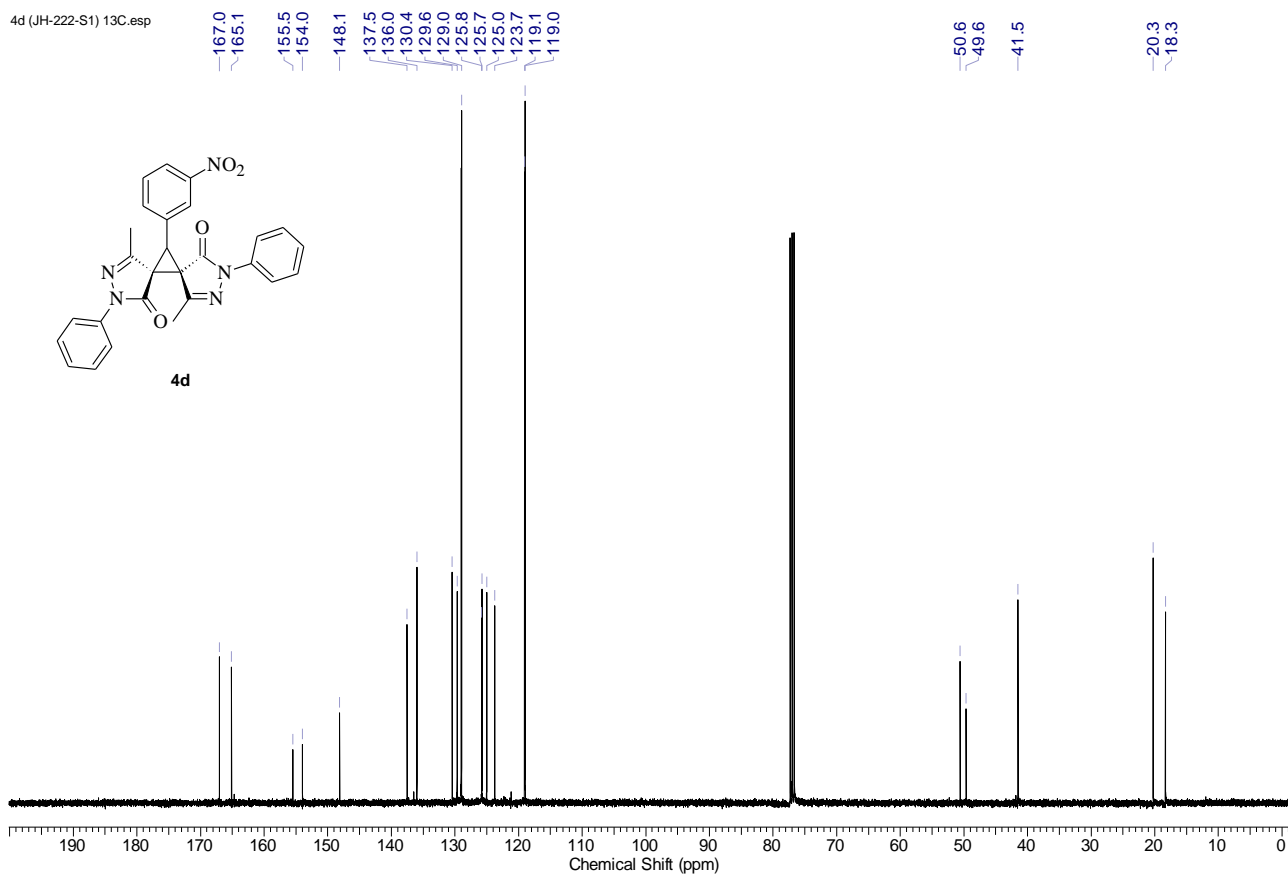

Figure S42. <sup>13</sup>C NMR spectrum of compound **4d**

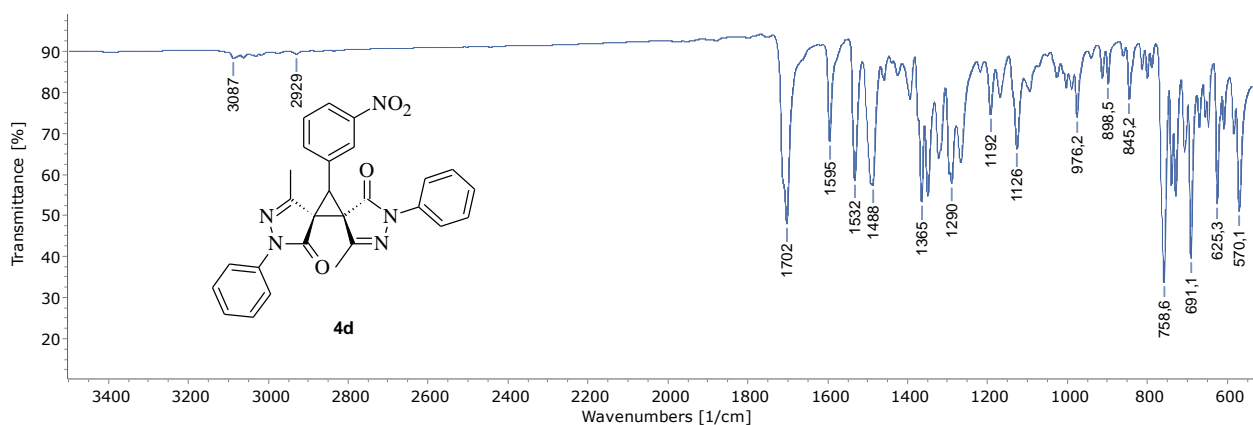

**Figure S43.** FTIR spectrum of compound **4d**

#### Acquisition Parameter

|                   |               |              |           |                          |         |
|-------------------|---------------|--------------|-----------|--------------------------|---------|
| Ion Source Type   | ESI           | Ion Polarity | Positive  | Alternating Ion Polarity | off     |
| Mass Range Mode   | XtremeScan    | Scan Begin   | 70 m/z    | Scan End                 | 400 m/z |
| Accumulation Time | 20000 $\mu$ s | RF Level     | 63 %      | Trap Drive               | 54.1    |
| SPS Target Mass   | 400 m/z       | Averages     | 3 Spectra | n/a                      | n/a     |

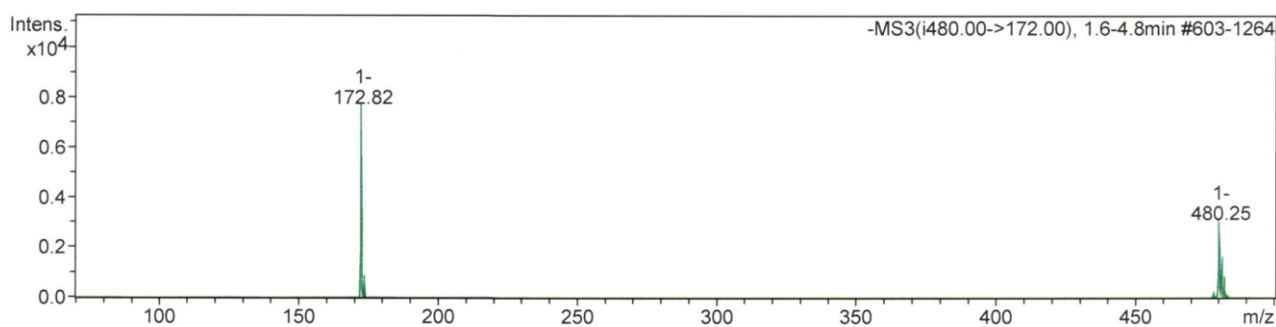

| Component | Molecular Mass | Molecule | Absolute Abundance | Relative Abundance |        |
|-----------|----------------|----------|--------------------|--------------------|--------|
| A         | 172.82         | 172.90   | [M - H] -          | 7518               | 100.00 |
| B         | 480.23         | 480.77   | [M - H] -          | 2933               | 39.01  |

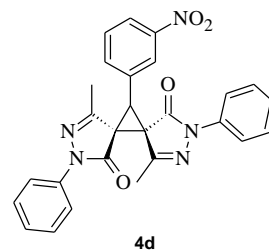

**Figure S44.** ESI-MS spectrum of compound **4d**

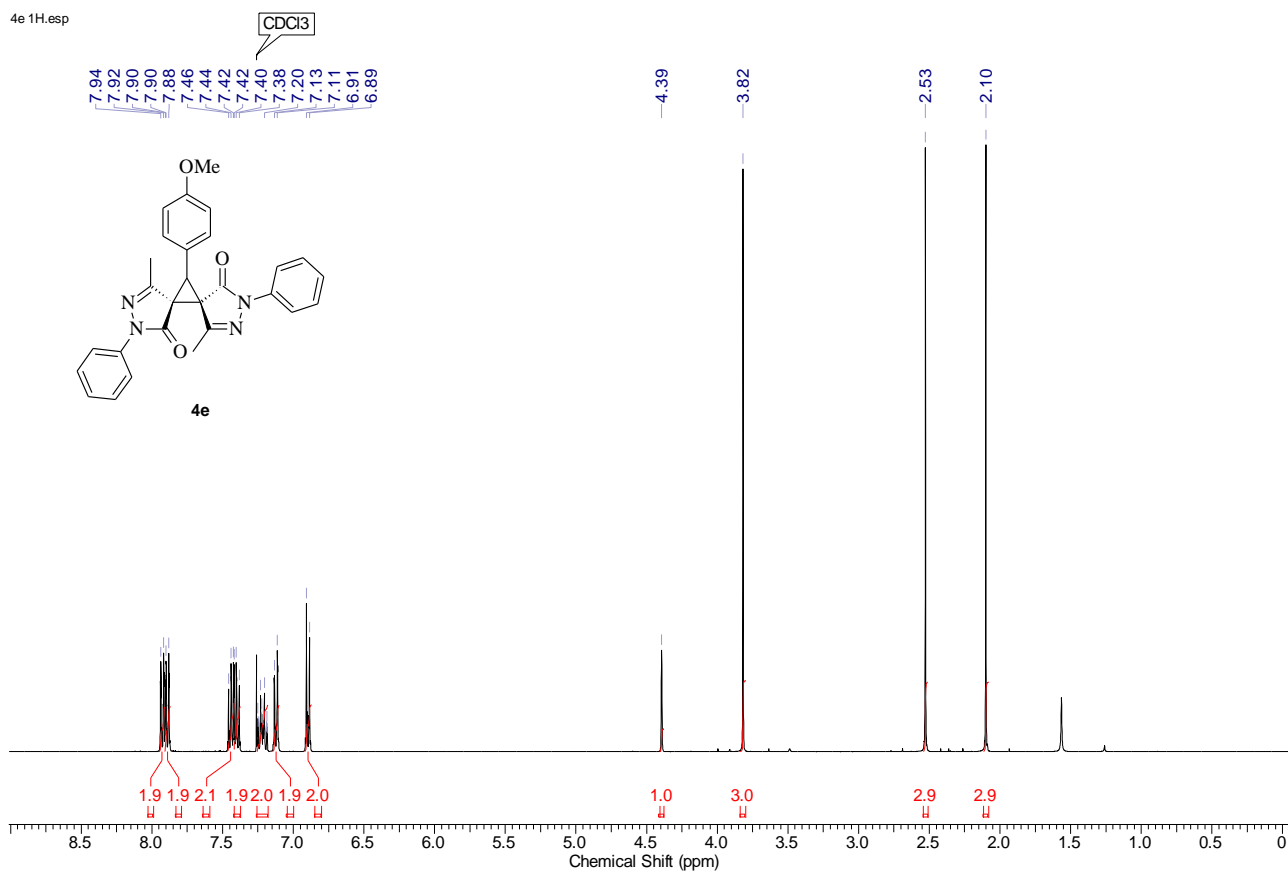

Figure S45. <sup>1</sup>H NMR spectrum of compound **4e**

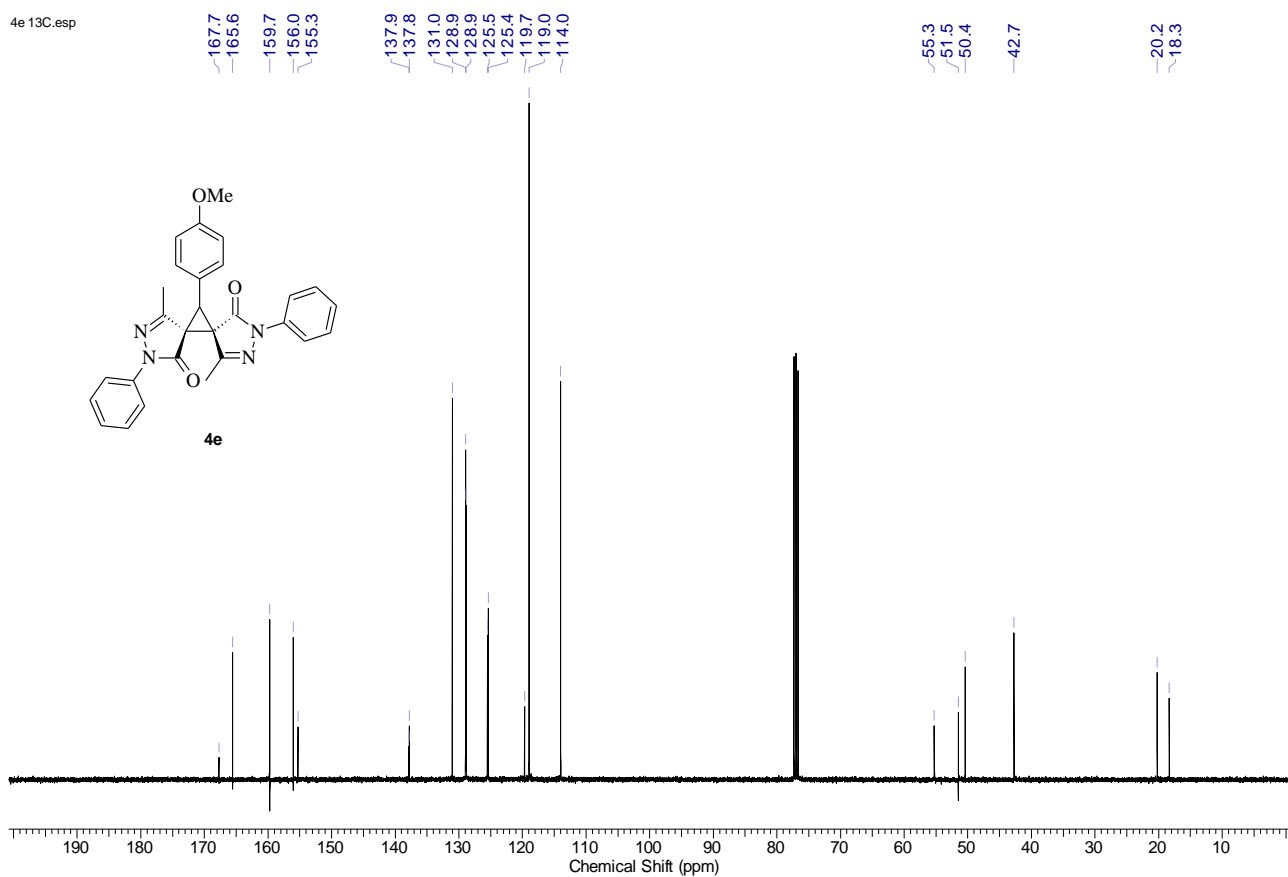

Figure S46. <sup>13</sup>C NMR spectrum of compound **4e**

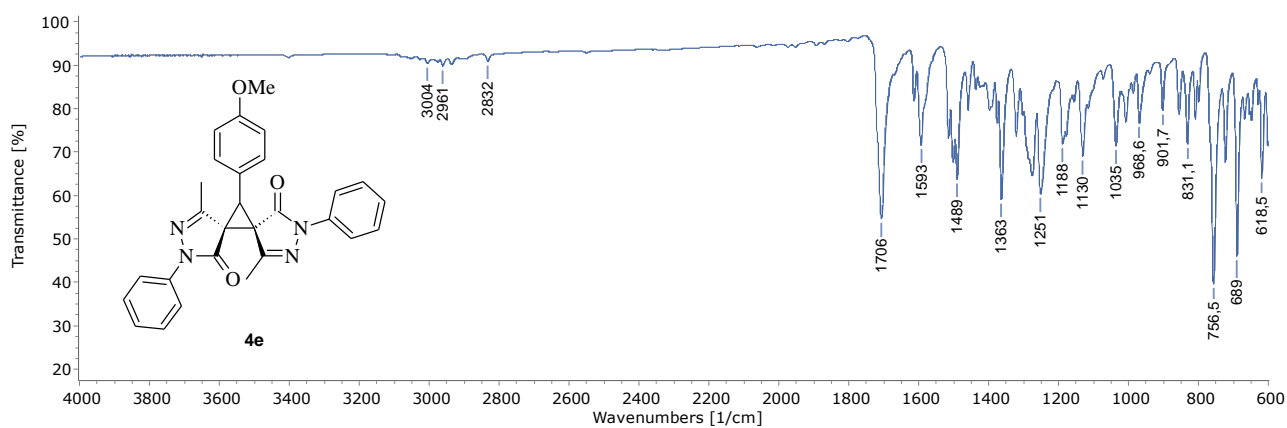

**Figure S47.** FTIR spectrum of compound **4e**

#### Acquisition Parameter

|                   |                |              |           |                          |         |
|-------------------|----------------|--------------|-----------|--------------------------|---------|
| Ion Source Type   | ESI            | Ion Polarity | Positive  | Alternating Ion Polarity | off     |
| Mass Range Mode   | UltraScan      | Scan Begin   | 70 m/z    | Scan End                 | 500 m/z |
| Accumulation Time | 199196 $\mu$ s | RF Level     | 63 %      | Trap Drive               | 54.1    |
| SPS Target Mass   | 400 m/z        | Averages     | 5 Spectra | n/a                      | n/a     |

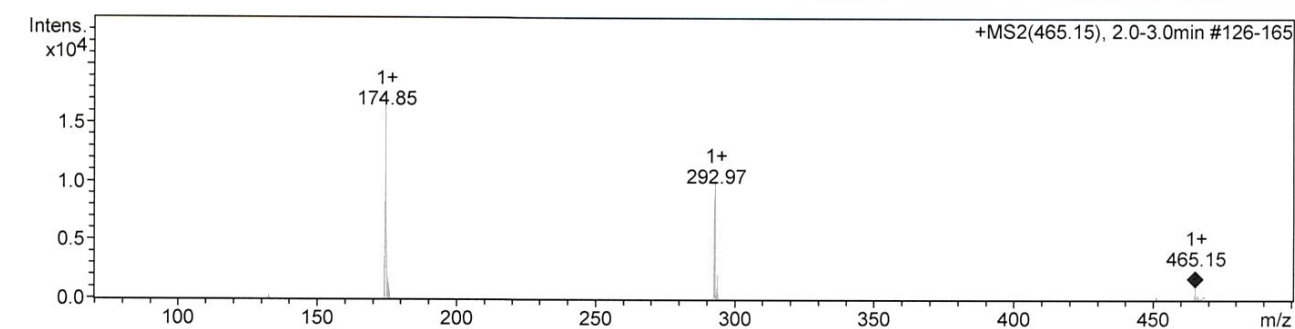

| Component | Molecular Mass | Molecule | Absolute Abundance   | Relative Abundance |
|-----------|----------------|----------|----------------------|--------------------|
| A         | 174.85         | 174.92   | [M + H] <sup>+</sup> | 100.00             |
| B         | 292.97         | 293.12   | [M + H] <sup>+</sup> | 59.57              |
| C         | 465.15         | 465.53   | [M + H] <sup>+</sup> | 6.66               |

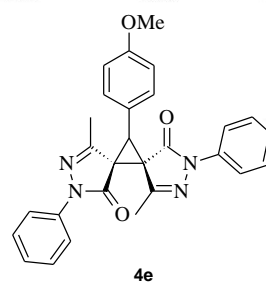

**Figure S48.** ESI-MS spectrum of compound **4e**



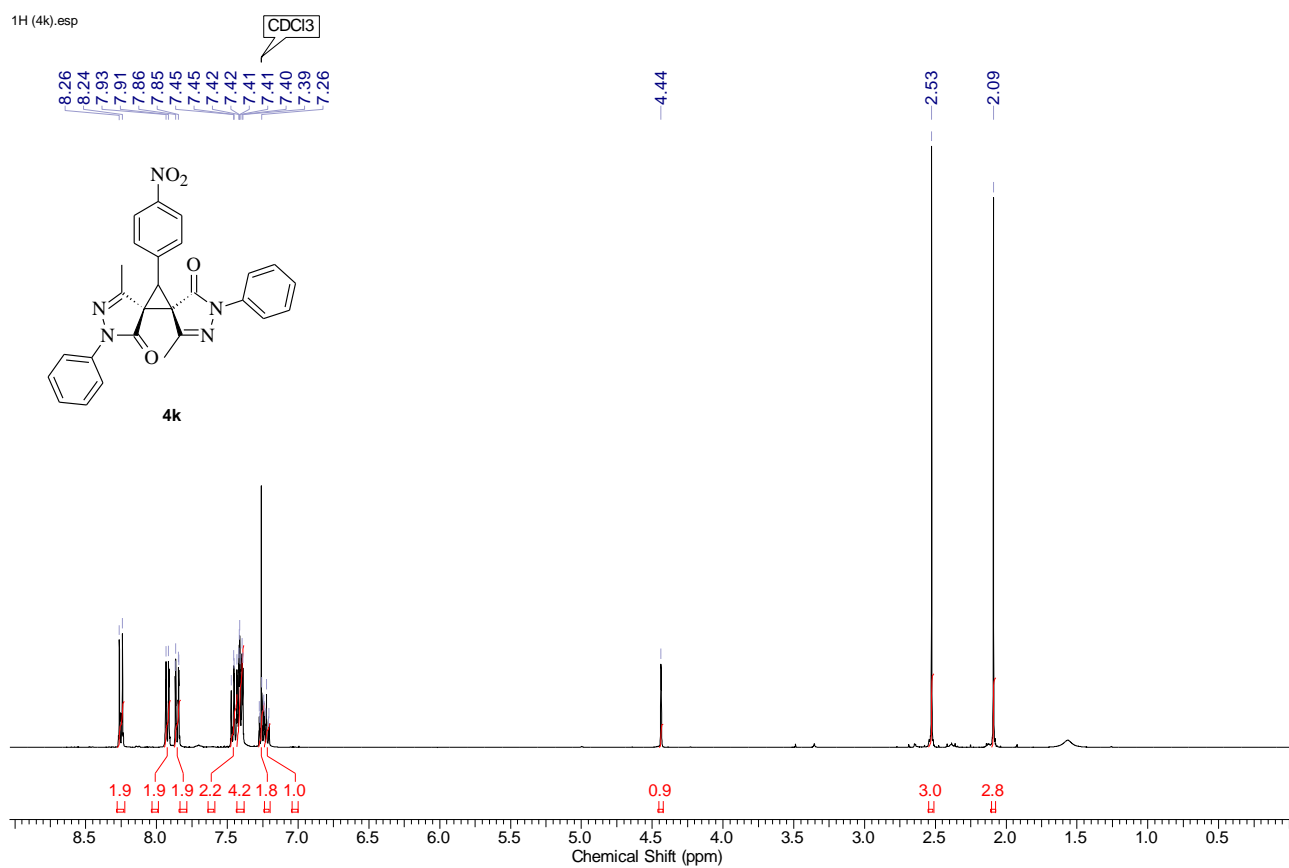

Figure S51. <sup>1</sup>H NMR spectrum of compound **4k**

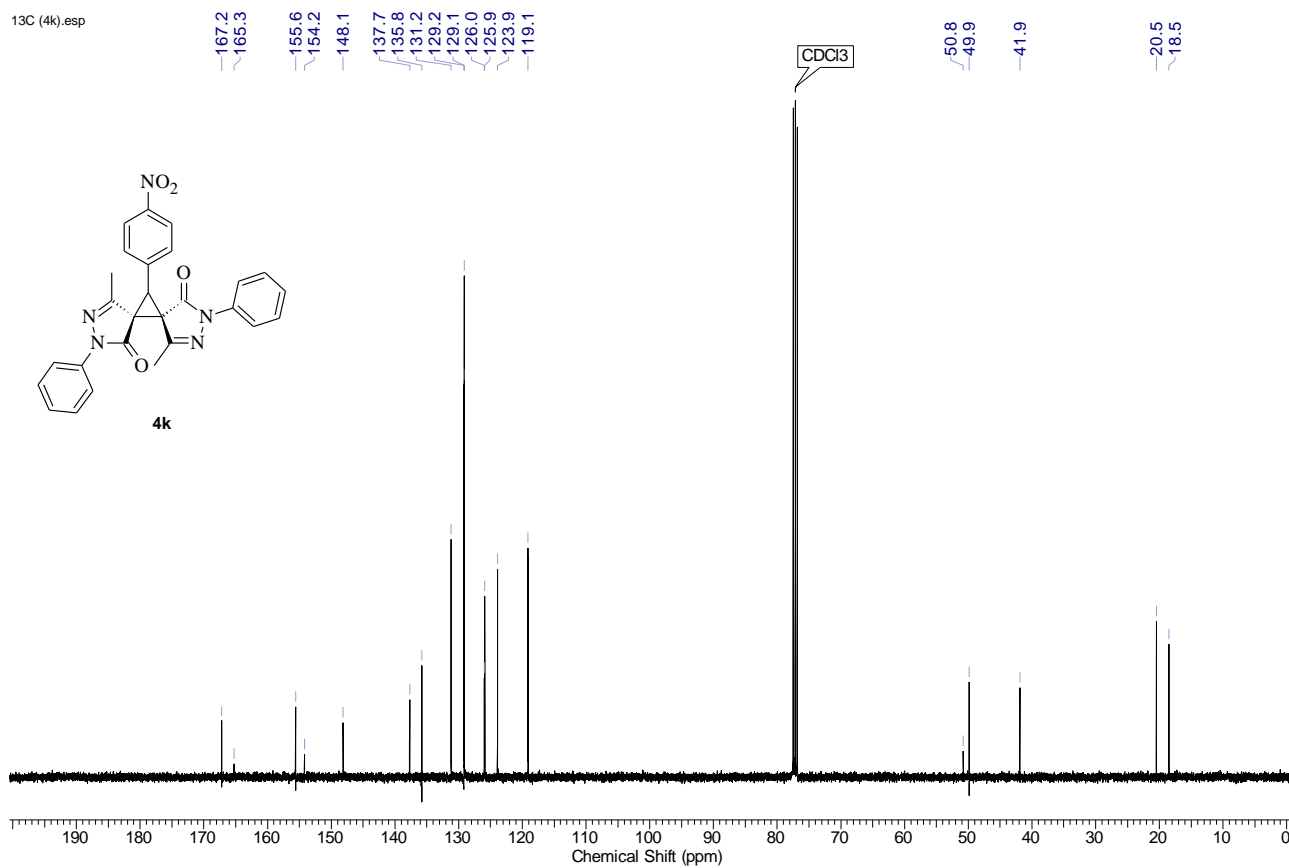

Figure S52. <sup>13</sup>C NMR spectrum of compound **4k**

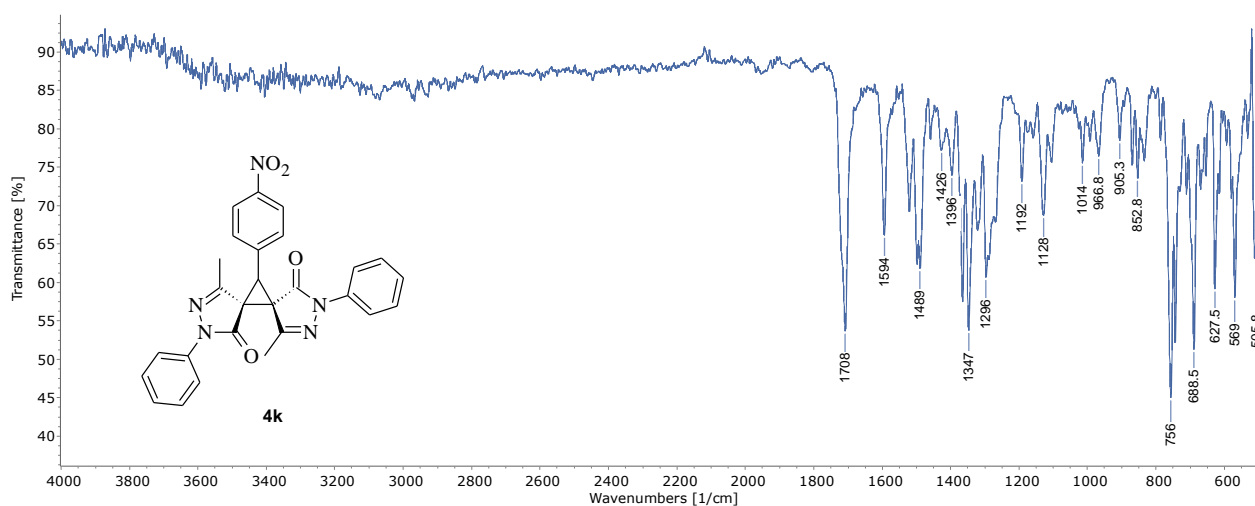

Figure S53. FTIR spectrum of compound **4k**

#### Acquisition Parameter

|                   |                |              |           |                          |         |
|-------------------|----------------|--------------|-----------|--------------------------|---------|
| Ion Source Type   | ESI            | Ion Polarity | Positive  | Alternating Ion Polarity | off     |
| Mass Range Mode   | UltraScan      | Scan Begin   | 70 m/z    | Scan End                 | 600 m/z |
| Accumulation Time | 200000 $\mu$ s | RF Level     | 63 %      | Trap Drive               | 54.1    |
| SPS Target Mass   | 400 m/z        | Averages     | 5 Spectra | n/a                      | n/a     |

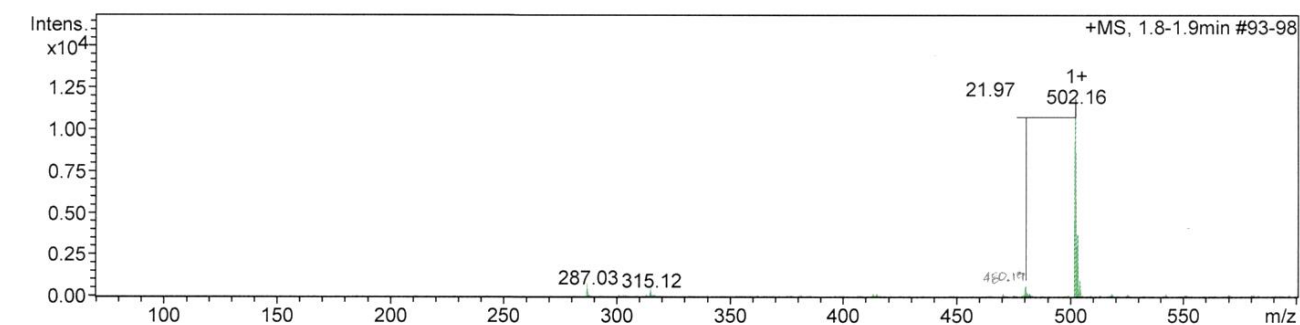

| Component | Molecular Mass | Molecule | Absolute Abundance   | Relative Abundance |        |
|-----------|----------------|----------|----------------------|--------------------|--------|
| A         | 502.16         | 502.49   | [M + H] <sup>+</sup> | 11262              | 100.00 |

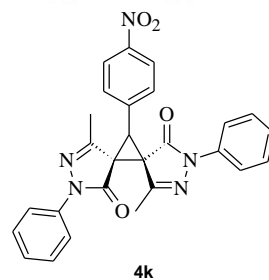

Figure S54. ESI-MS spectrum of compound **4k**

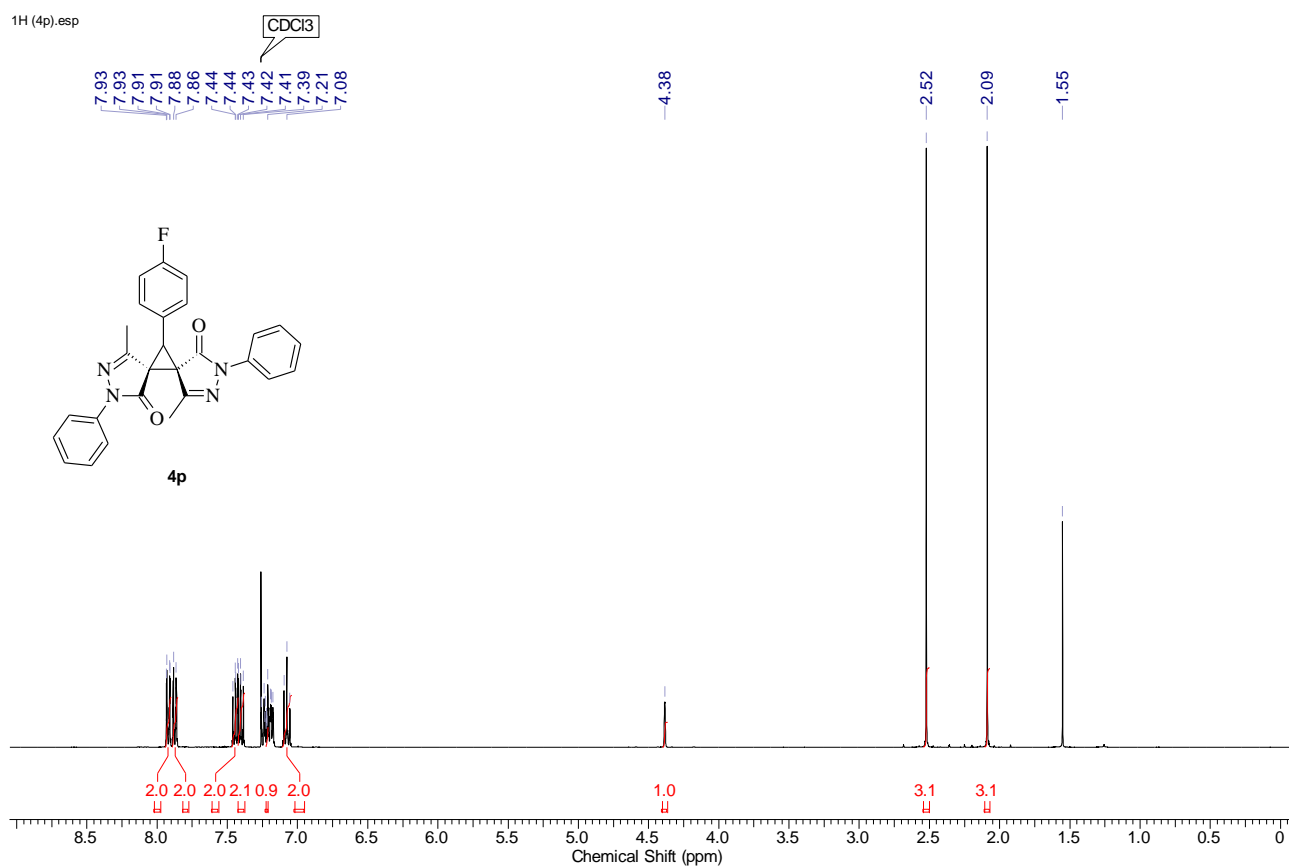

Figure S55.  $^1\text{H}$  NMR spectrum of compound **4p**

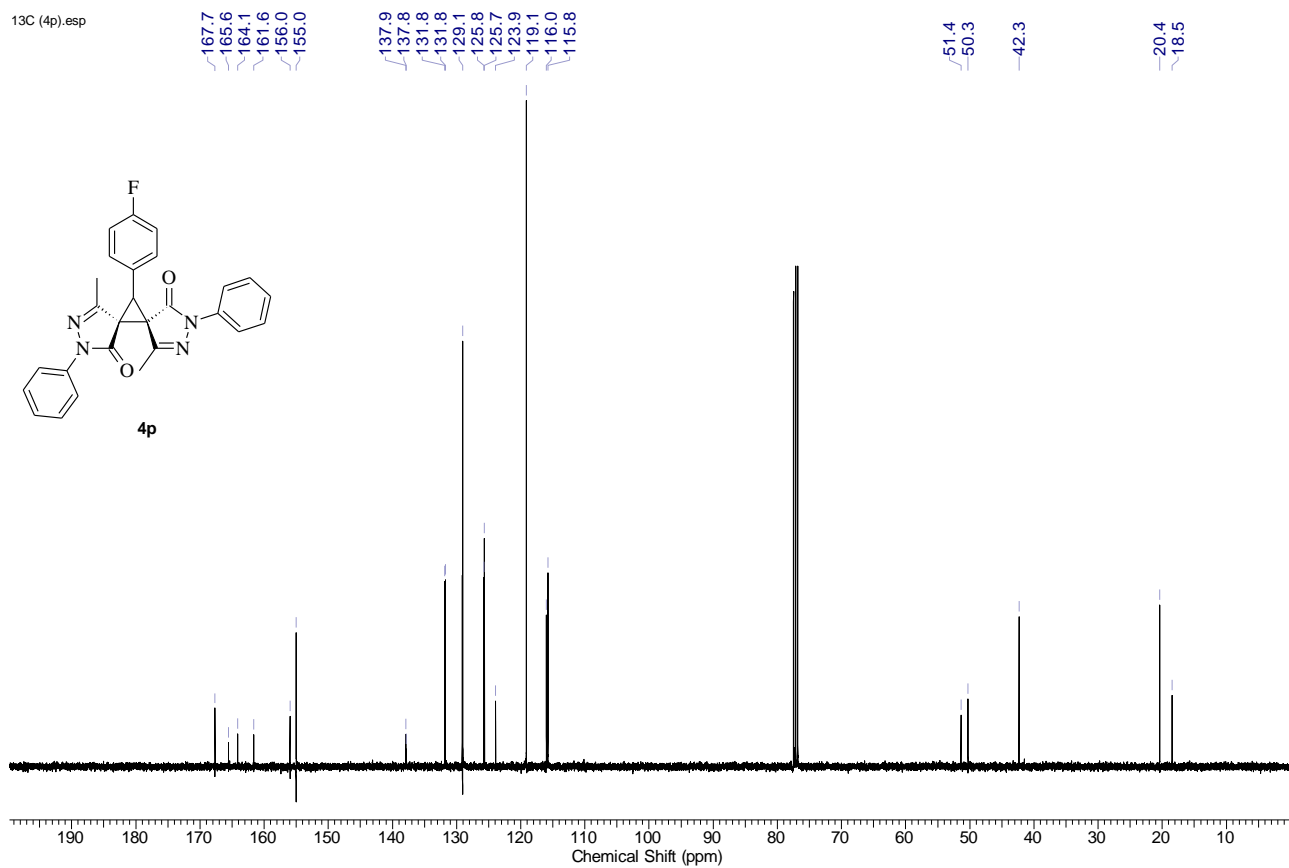

Figure S56.  $^{13}\text{C}$  NMR spectrum of compound **4p**



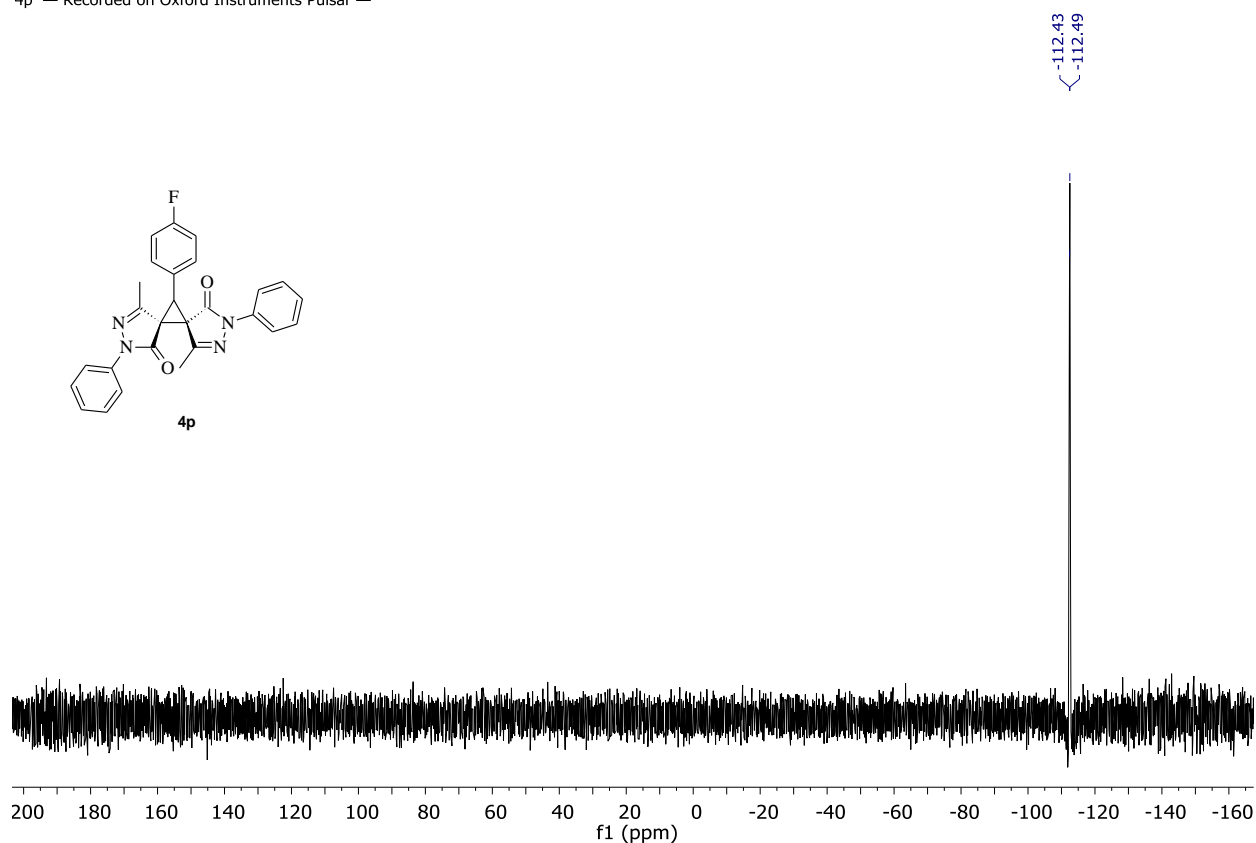

Figure S57.  $^{19}\text{F}$  NMR spectrum of compound **4p**

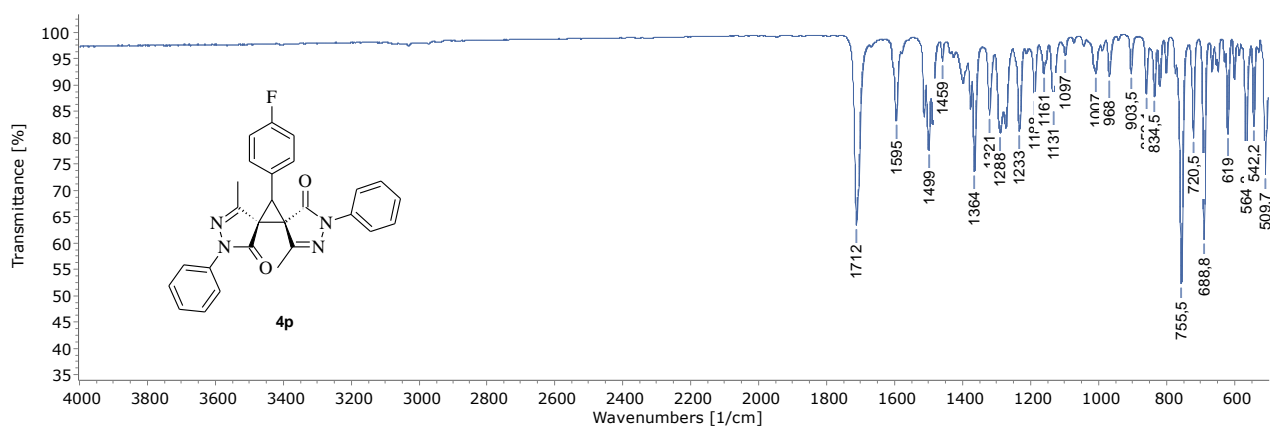

Figure S58. FTIR spectrum of compound **4p**

### Acquisition Parameter

|                   |              |              |           |                          |         |
|-------------------|--------------|--------------|-----------|--------------------------|---------|
| Ion Source Type   | ESI          | Ion Polarity | Positive  | Alternating Ion Polarity | off     |
| Mass Range Mode   | UltraScan    | Scan Begin   | 70 m/z    | Scan End                 | 600 m/z |
| Accumulation Time | 9580 $\mu$ s | RF Level     | 63 %      | Trap Drive               | 54.1    |
| SPS Target Mass   | 400 m/z      | Averages     | 5 Spectra | n/a                      | n/a     |

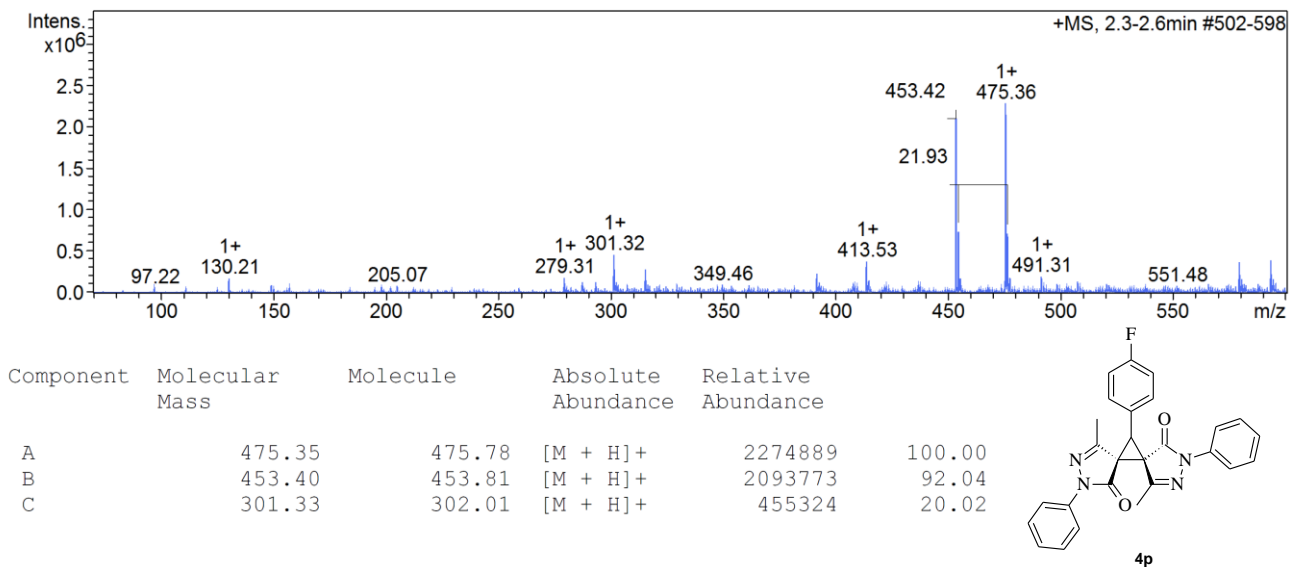

Figure S59. ESI-MS spectrum of compound 4p

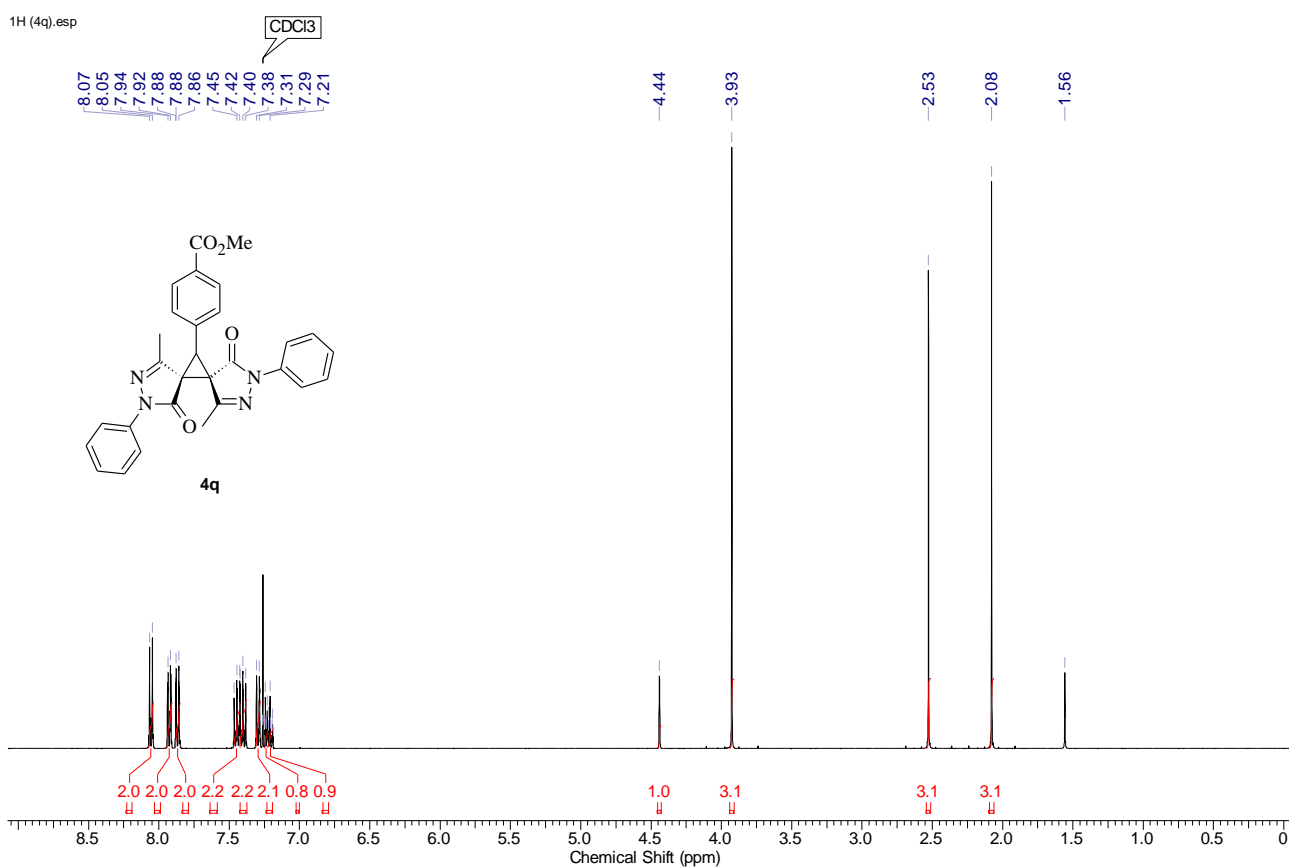

Figure S60. <sup>1</sup>H NMR spectrum of compound 4q

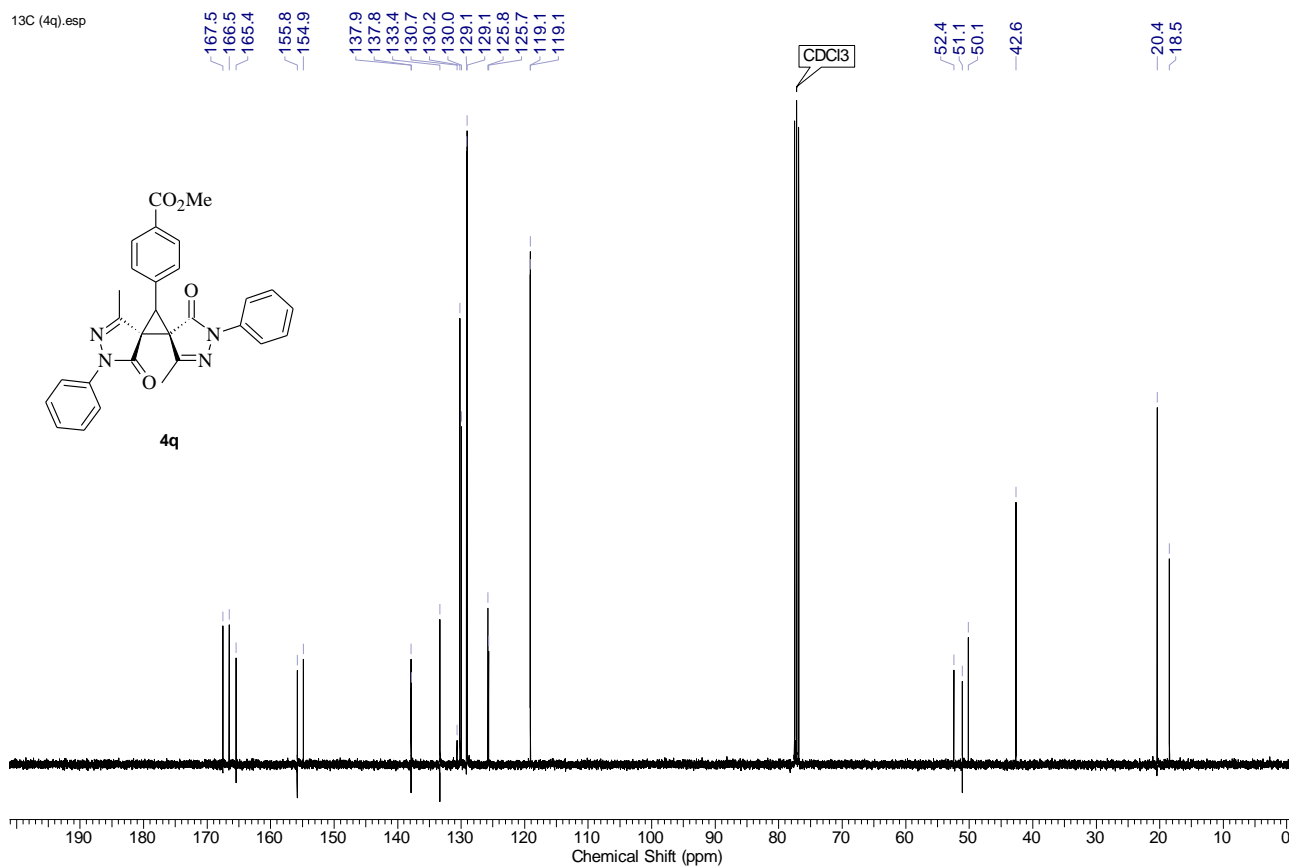

Figure S61. <sup>13</sup>C NMR spectrum of compound **4q**

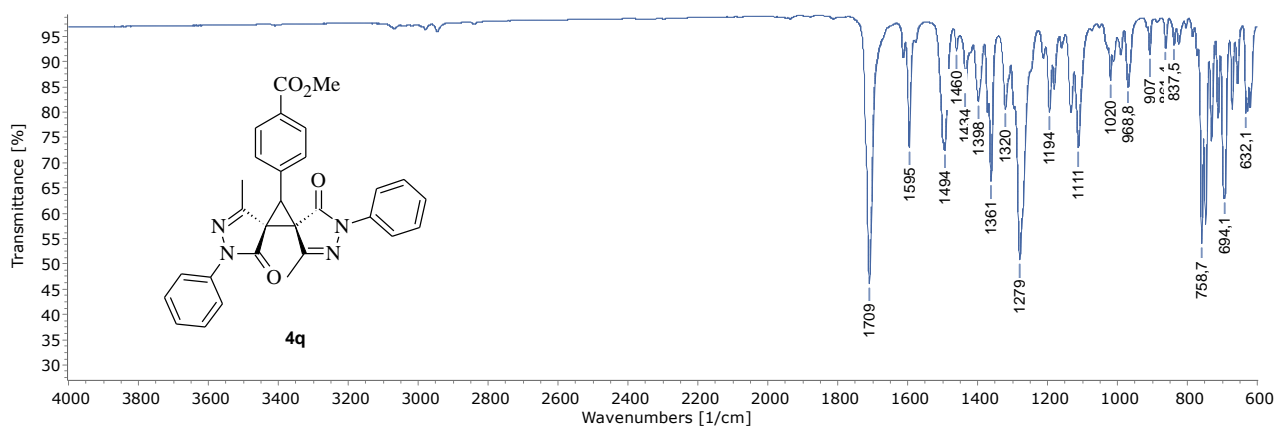

Figure S62. FTIR spectrum of compound **4q**

# Acquisition Parameter

|                   |              |              |           |                          |         |
|-------------------|--------------|--------------|-----------|--------------------------|---------|
| Ion Source Type   | ESI          | Ion Polarity | Positive  | Alternating Ion Polarity | off     |
| Mass Range Mode   | UltraScan    | Scan Begin   | 70 m/z    | Scan End                 | 600 m/z |
| Accumulation Time | 6959 $\mu$ s | RF Level     | 63 %      | Trap Drive               | 54.1    |
| SPS Target Mass   | 400 m/z      | Averages     | 5 Spectra | n/a                      | n/a     |

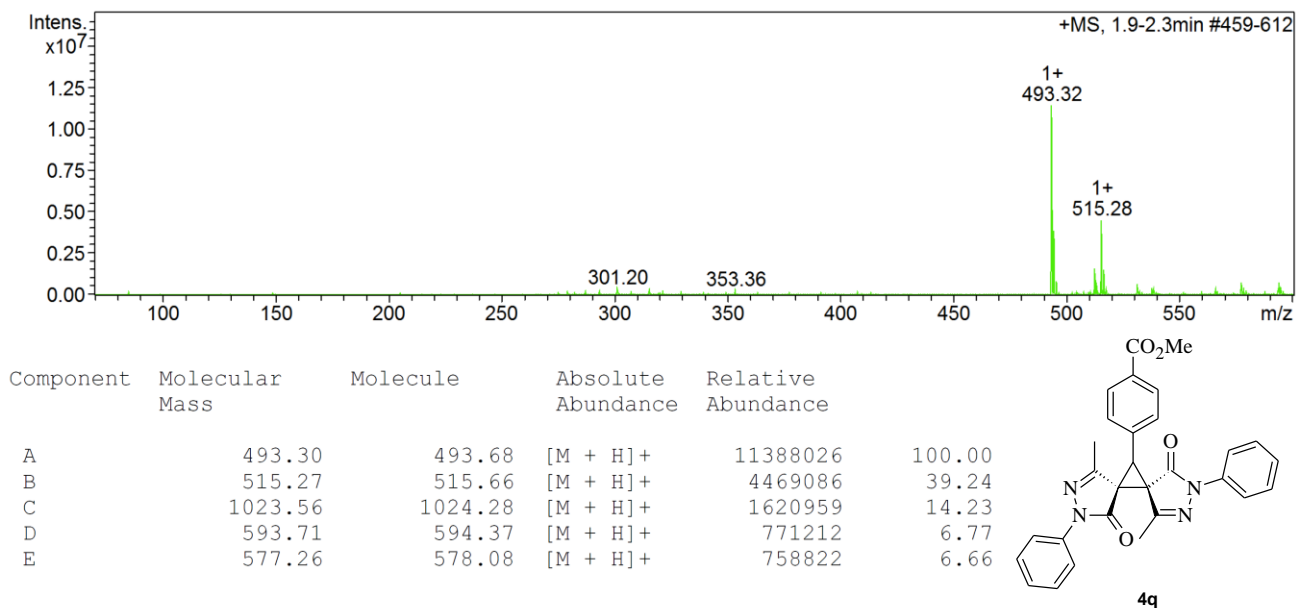

Figure S63. ESI-MS spectrum of compound **4q**

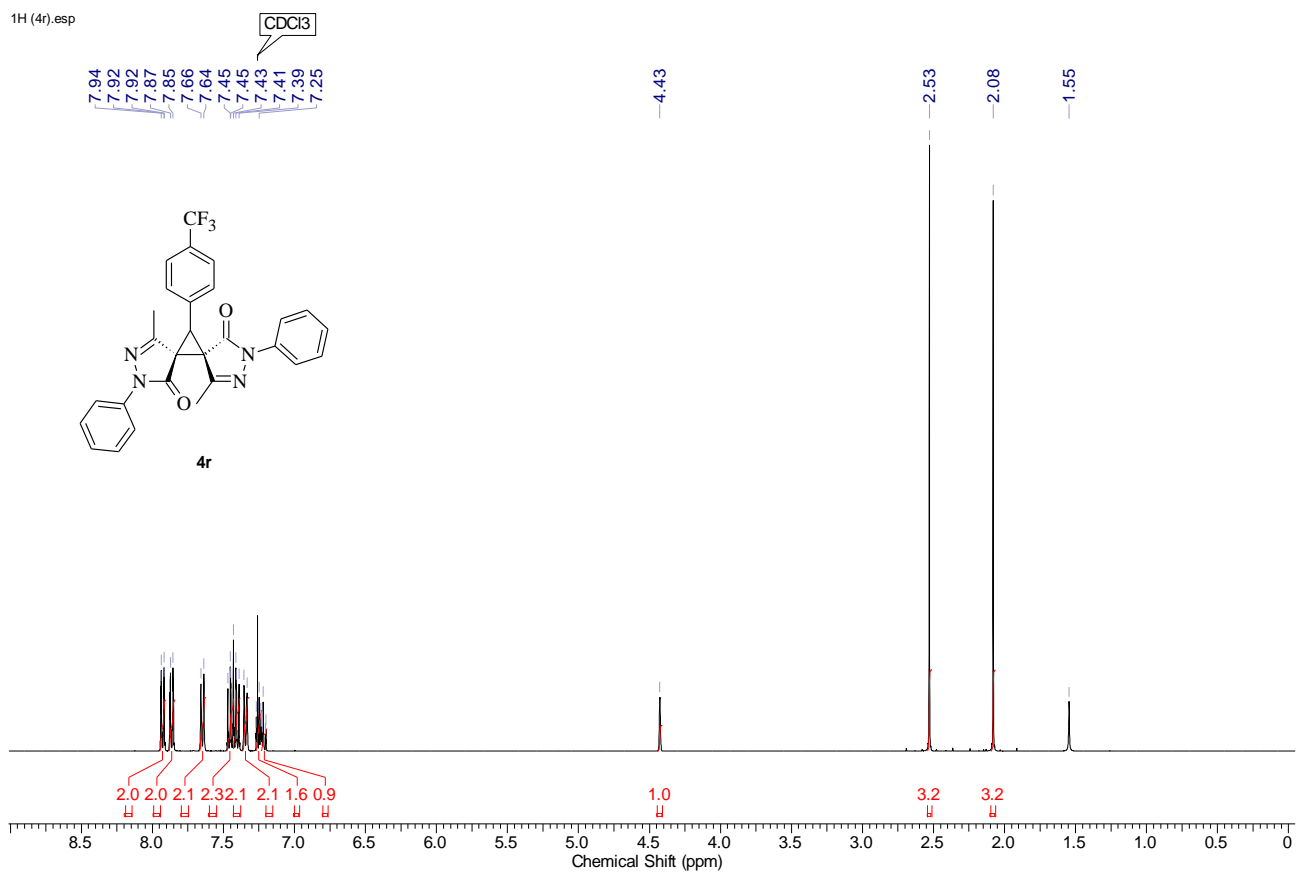

Figure S64. <sup>1</sup>H NMR spectrum of compound **4r**

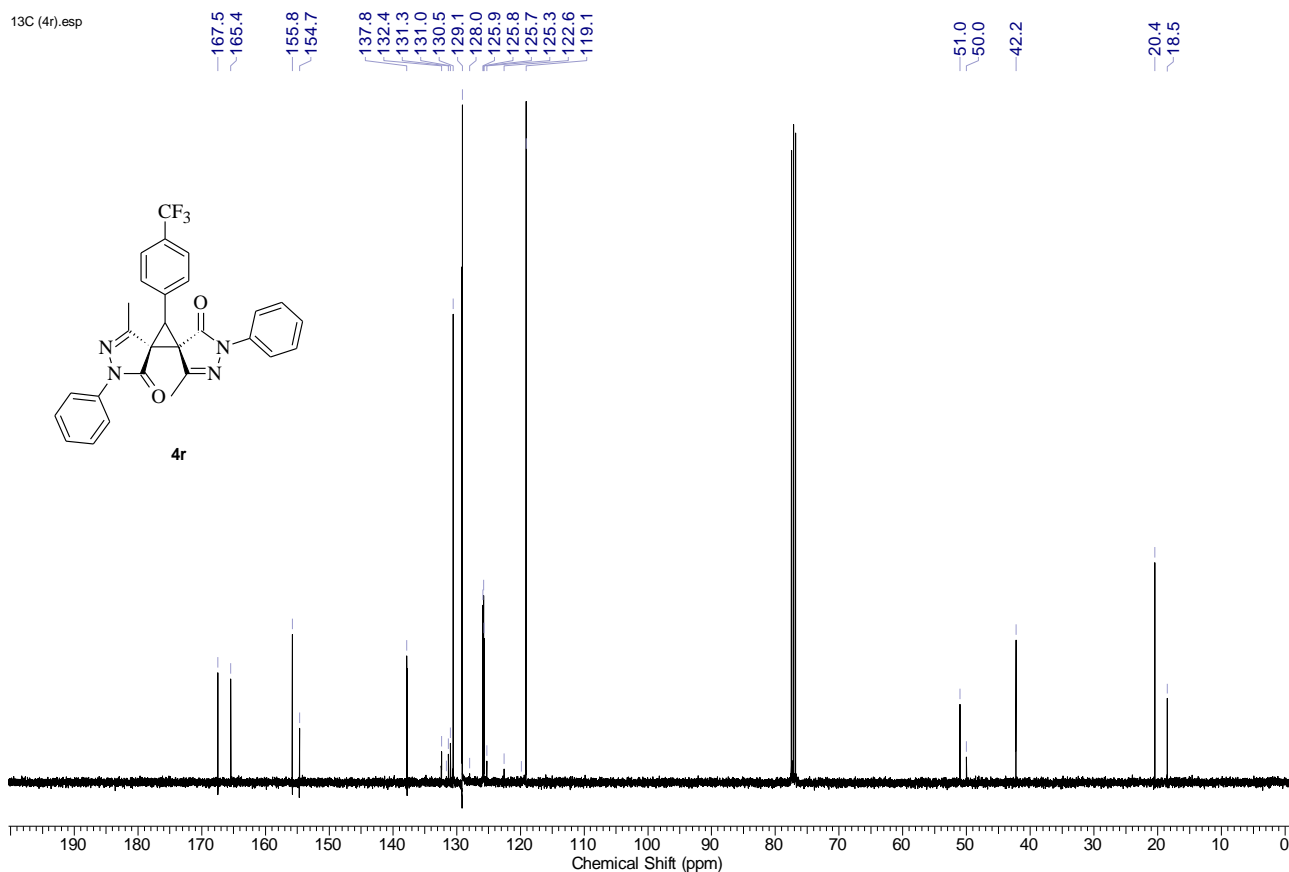

Figure S65.  $^{13}\text{C}$  NMR spectrum of compound **4r**

4r — Recorded on Oxford Instruments Pulsar —

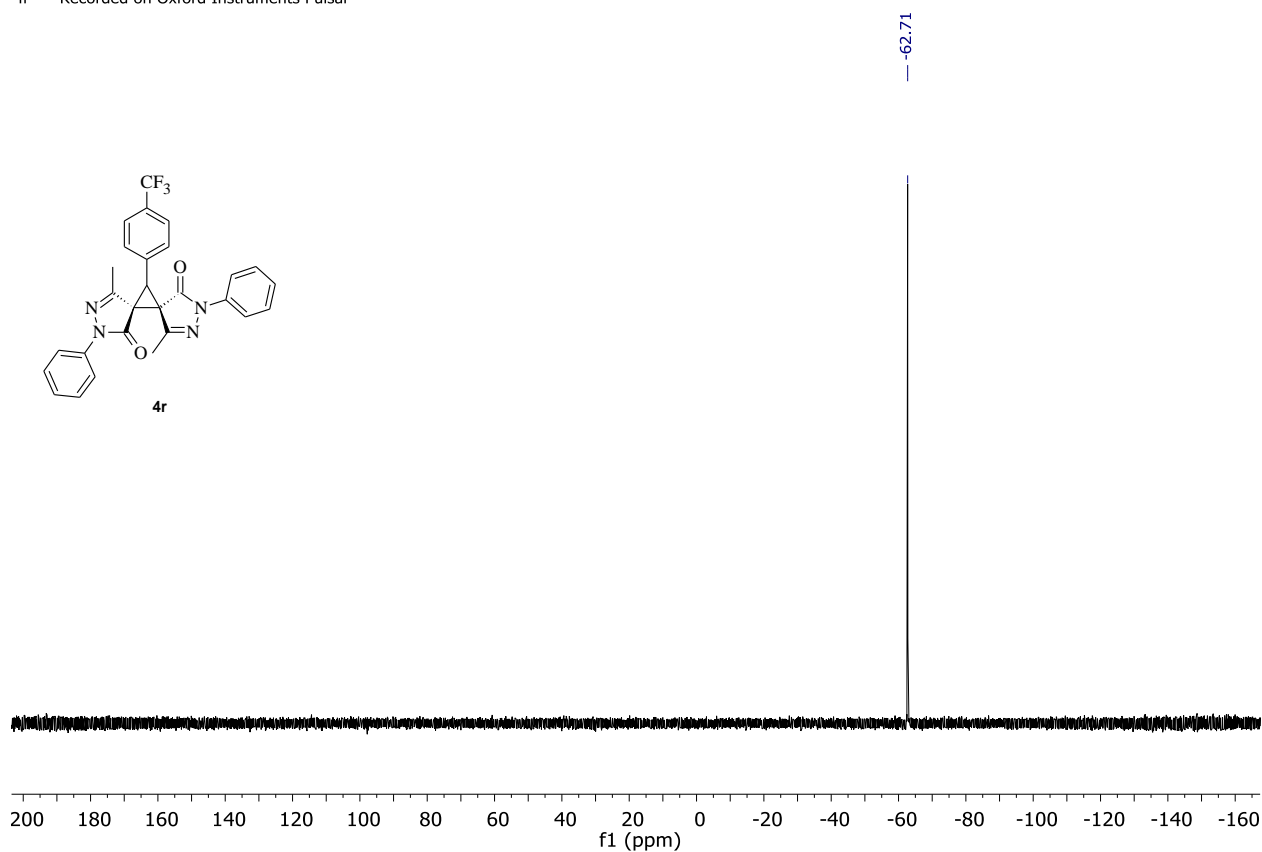

Figure S66.  $^{19}\text{F}$  NMR spectrum of compound **4r**

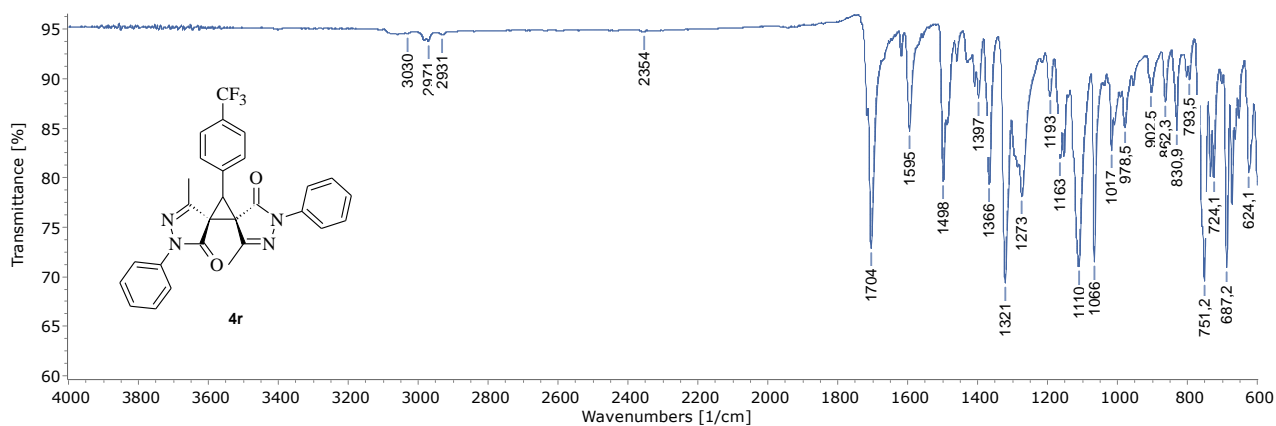

Figure S67. FTIR spectrum of compound **4r**

#### Acquisition Parameter

|                   |               |              |           |                          |         |
|-------------------|---------------|--------------|-----------|--------------------------|---------|
| Ion Source Type   | ESI           | Ion Polarity | Positive  | Alternating Ion Polarity | off     |
| Mass Range Mode   | UltraScan     | Scan Begin   | 70 m/z    | Scan End                 | 600 m/z |
| Accumulation Time | 13368 $\mu$ s | RF Level     | 63 %      | Trap Drive               | 54.1    |
| SPS Target Mass   | 400 m/z       | Averages     | 5 Spectra | n/a                      | n/a     |

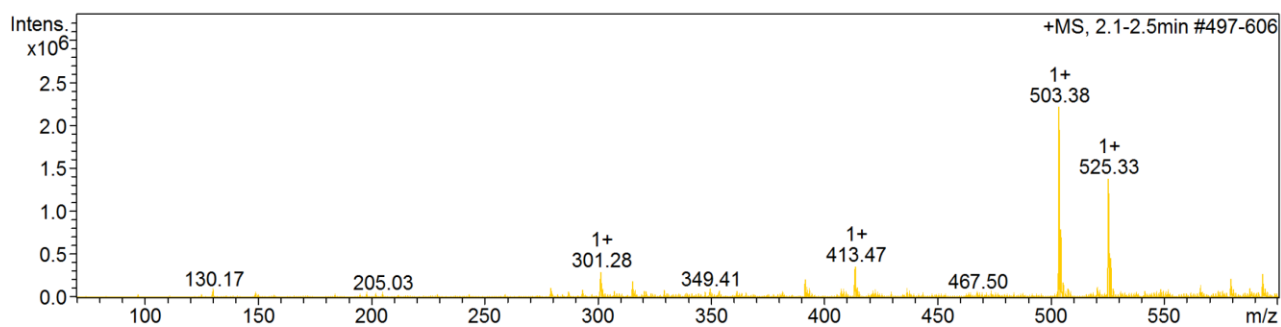

| Component | Molecular Mass | Molecule | Absolute Abundance   | Relative Abundance |        |
|-----------|----------------|----------|----------------------|--------------------|--------|
| A         | 503.36         | 503.75   | [M + H] <sup>+</sup> | 2206733            | 100.00 |
| B         | 525.32         | 525.72   | [M + H] <sup>+</sup> | 1378402            | 62.46  |
| C         | 413.47         | 413.97   | [M + H] <sup>+</sup> | 356961             | 16.18  |
| D         | 301.28         | 301.90   | [M + H] <sup>+</sup> | 294262             | 13.33  |

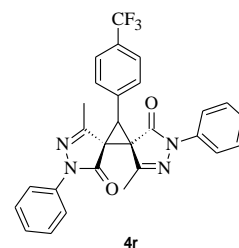

Figure S68. ESI-MS spectrum of compound **4r**

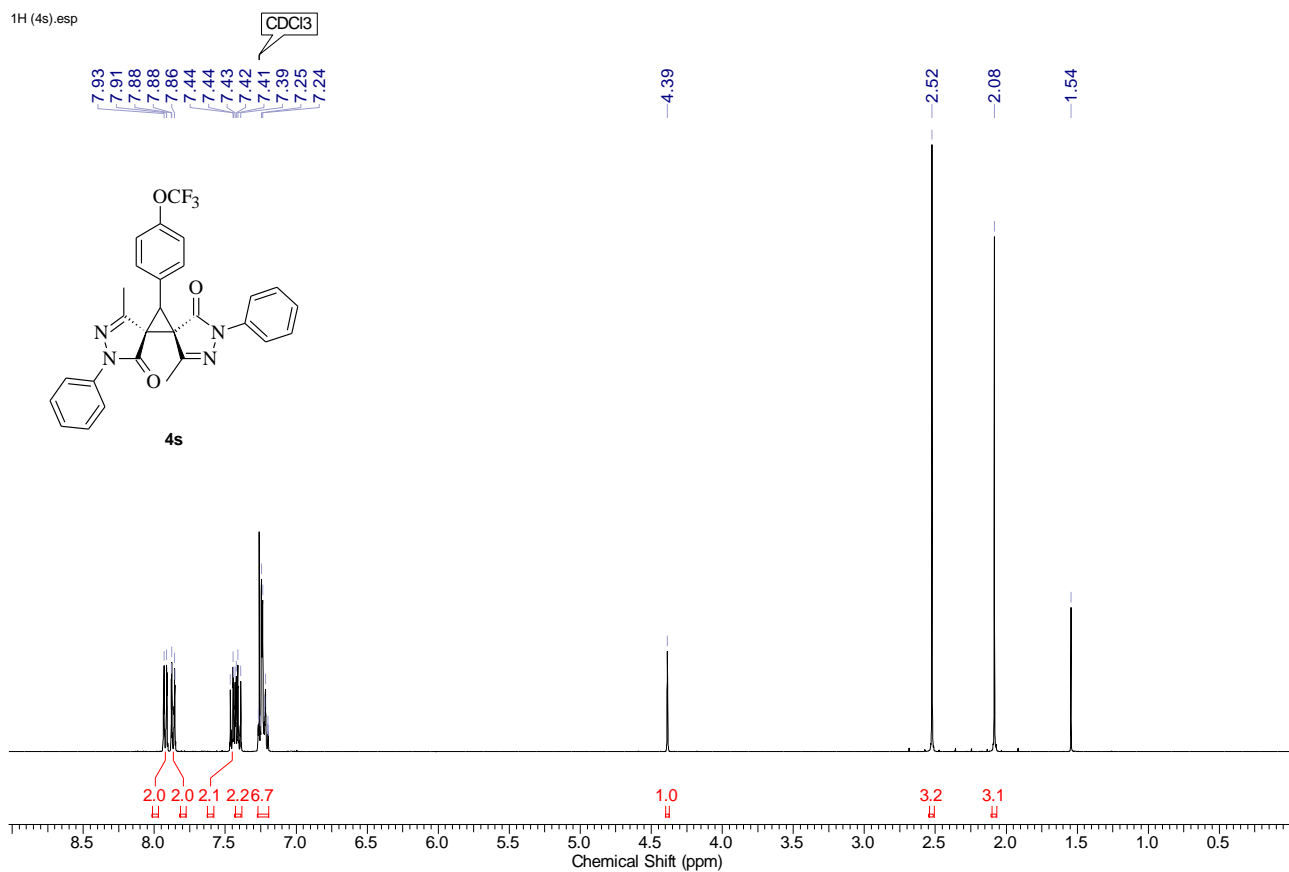

Figure S69. <sup>1</sup>H NMR spectrum of compound 4s

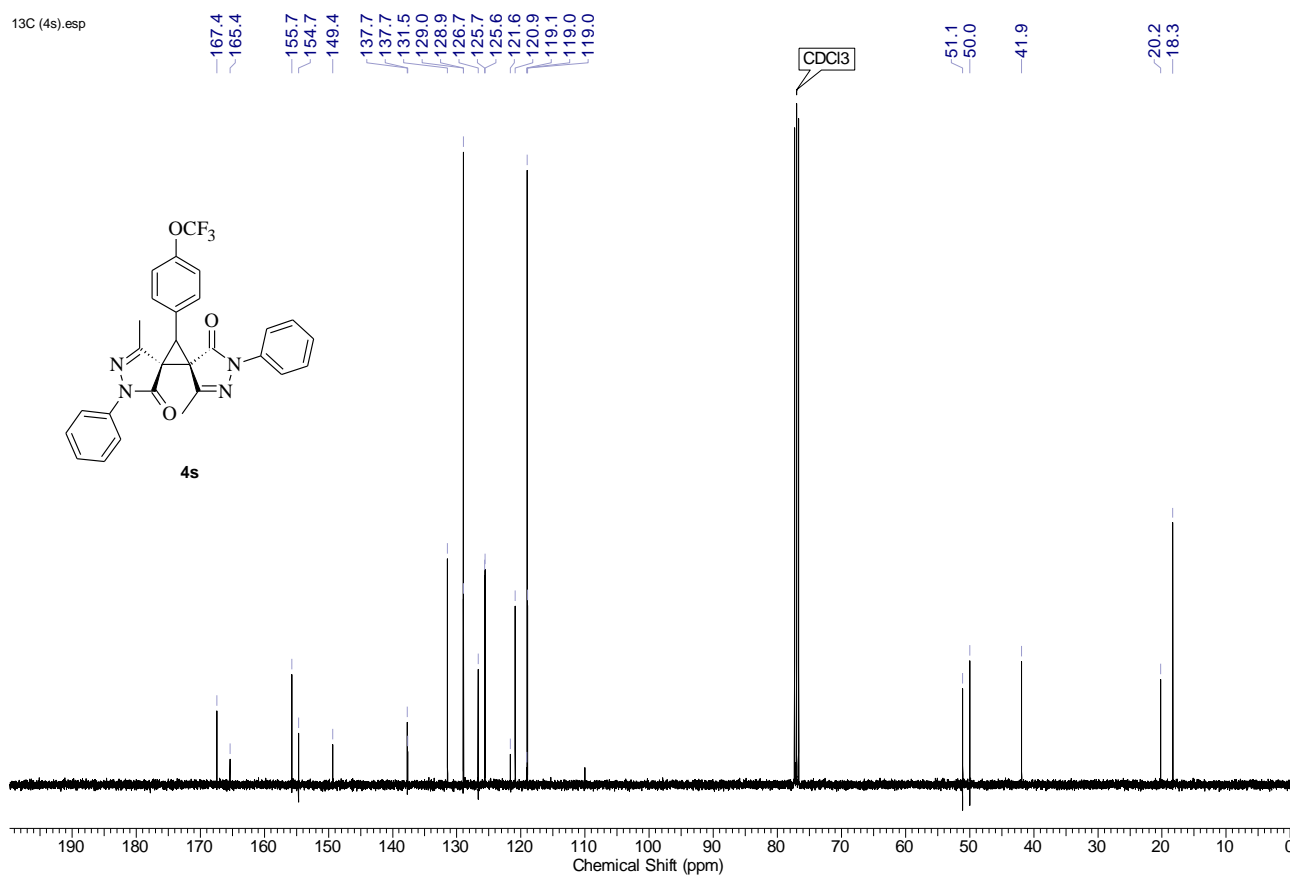

Figure S70. <sup>13</sup>C NMR spectrum of compound 4s

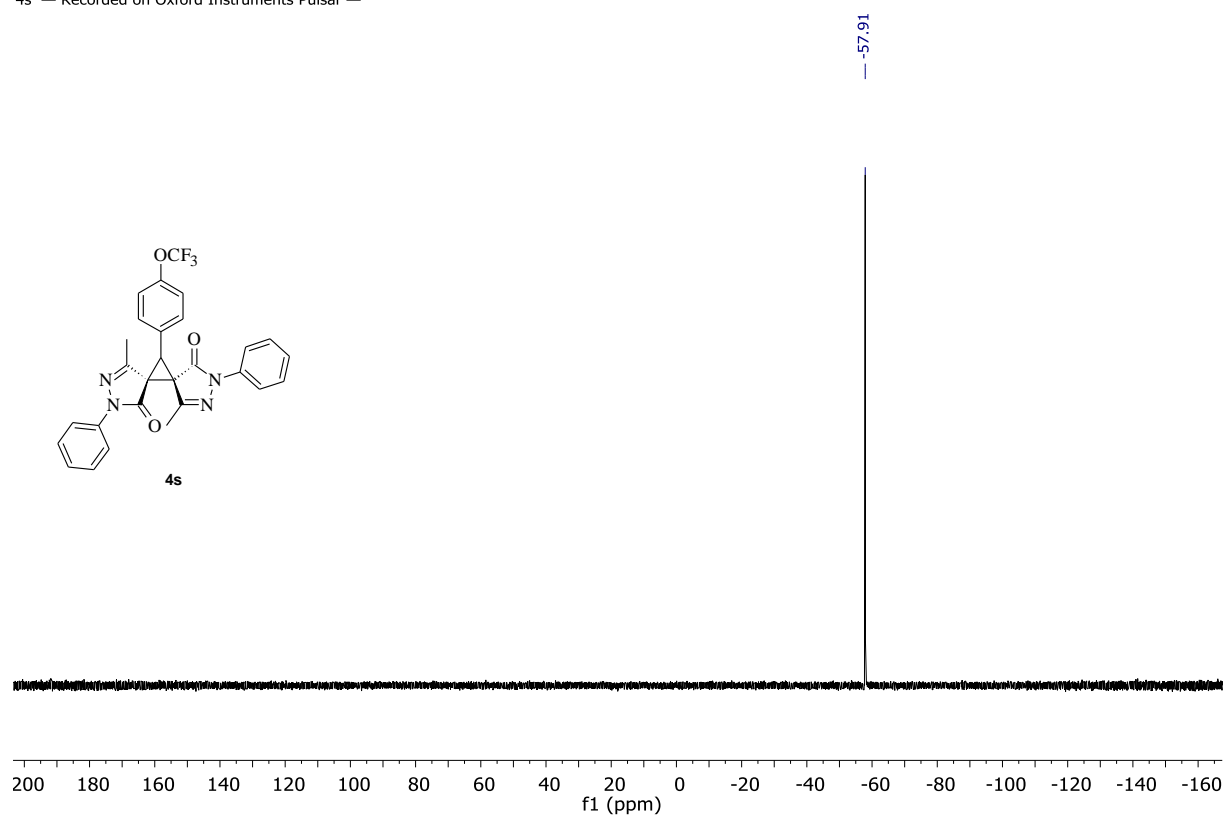

Figure S71. <sup>19</sup>F NMR spectrum of compound 4s

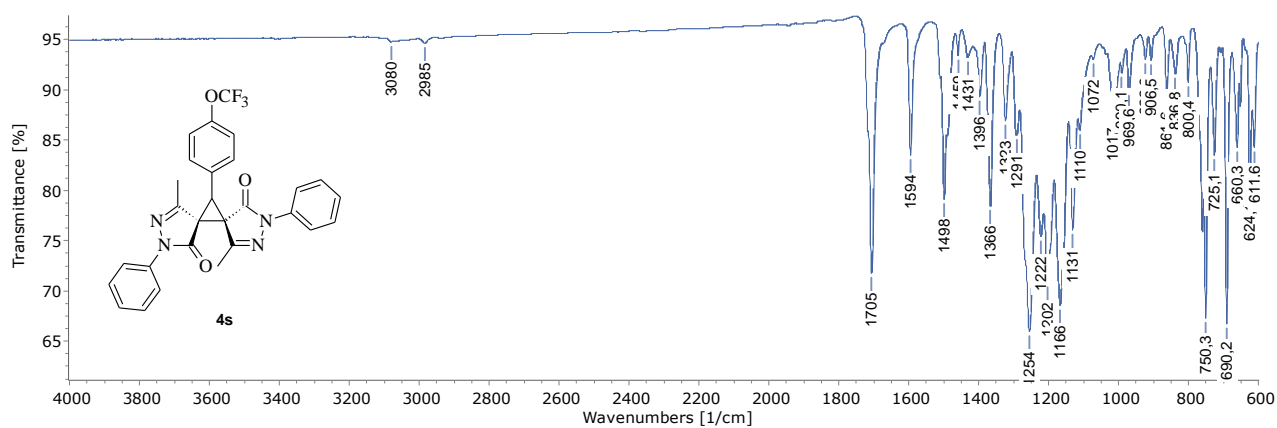

Figure S72. FTIR spectrum of compound 4s



# Acquisition Parameter

|                   |              |              |           |                          |         |
|-------------------|--------------|--------------|-----------|--------------------------|---------|
| Ion Source Type   | ESI          | Ion Polarity | Positive  | Alternating Ion Polarity | off     |
| Mass Range Mode   | UltraScan    | Scan Begin   | 70 m/z    | Scan End                 | 600 m/z |
| Accumulation Time | 9765 $\mu$ s | RF Level     | 63 %      | Trap Drive               | 54.1    |
| SPS Target Mass   | 400 m/z      | Averages     | 5 Spectra | n/a                      | n/a     |

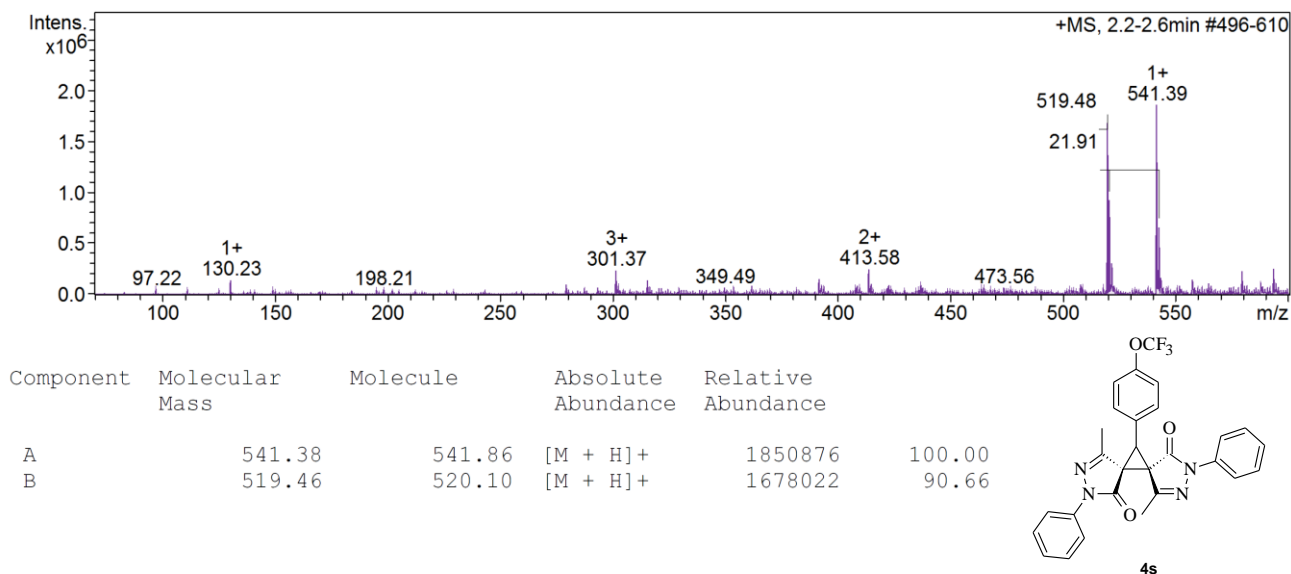

Figure S73. ESI-MS spectrum of compound 4s

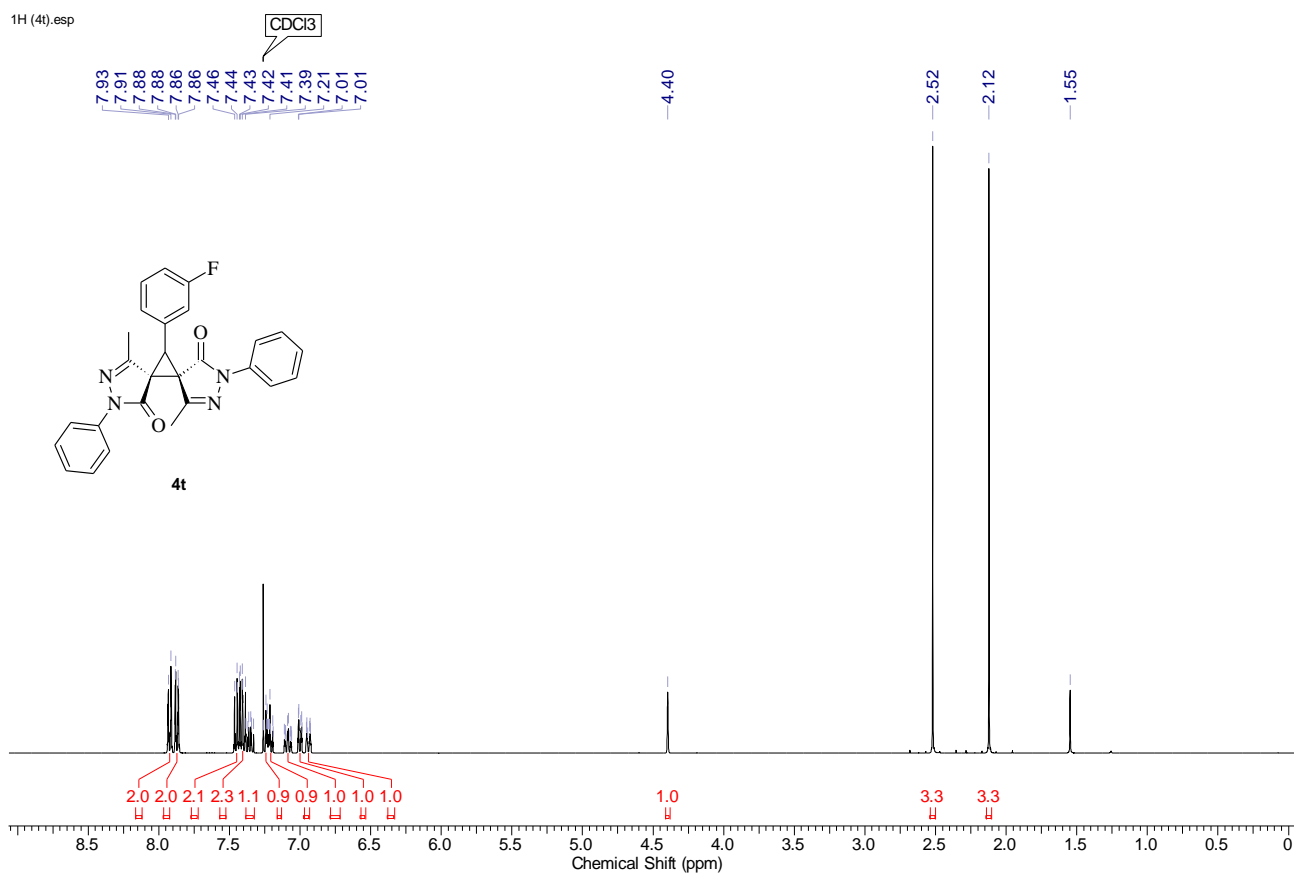

Figure S74. <sup>1</sup>H NMR spectrum of compound 4t

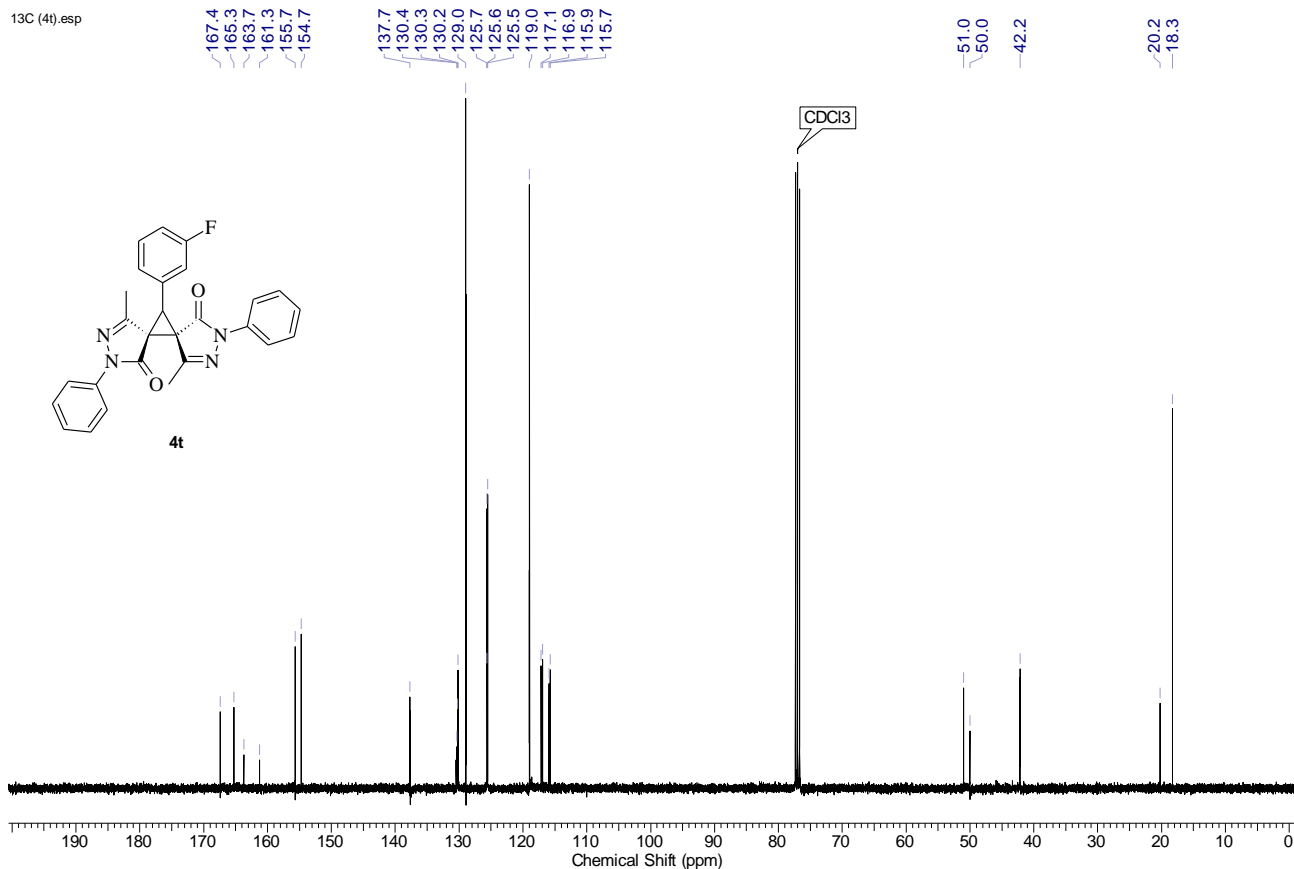

Figure S75.  $^{13}\text{C}$  NMR spectrum of compound **4t**

4t — Recorded on Oxford Instruments Pulsar —

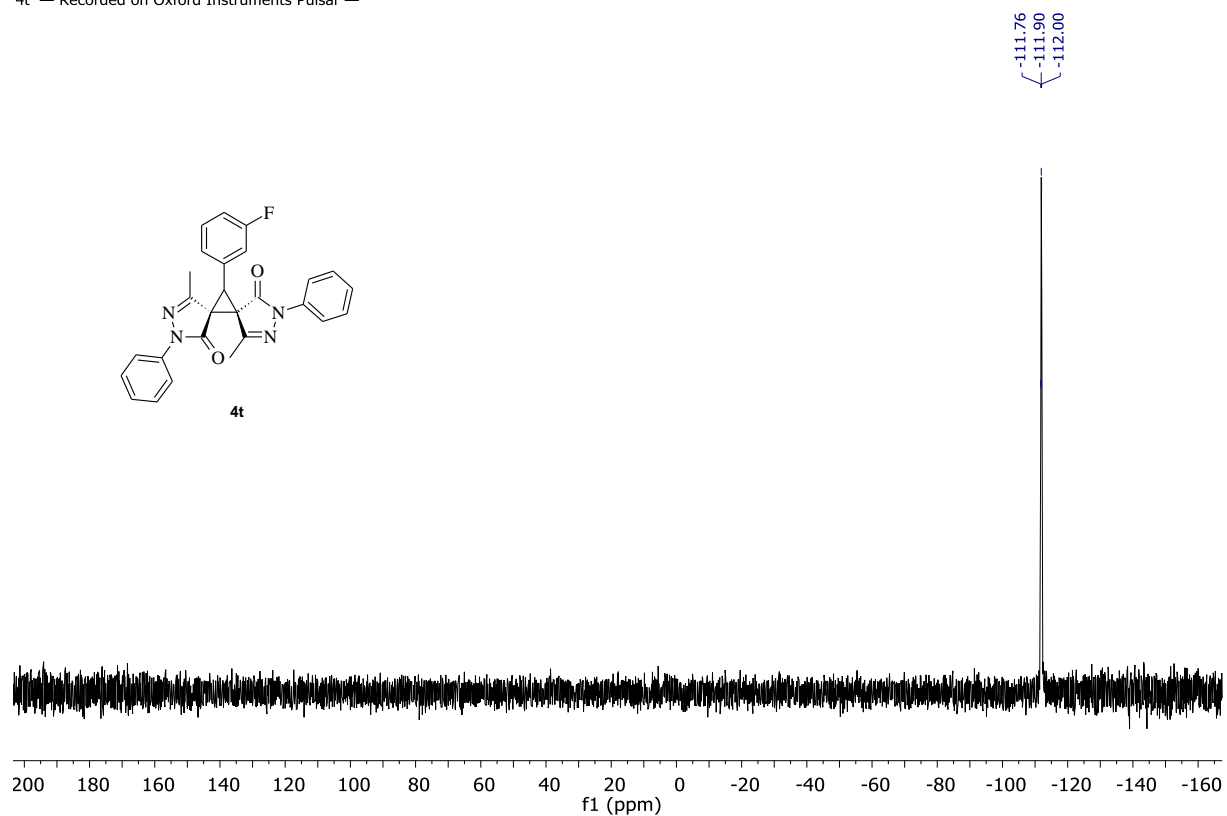

Figure S76.  $^{19}\text{F}$  NMR spectrum of compound **4t**

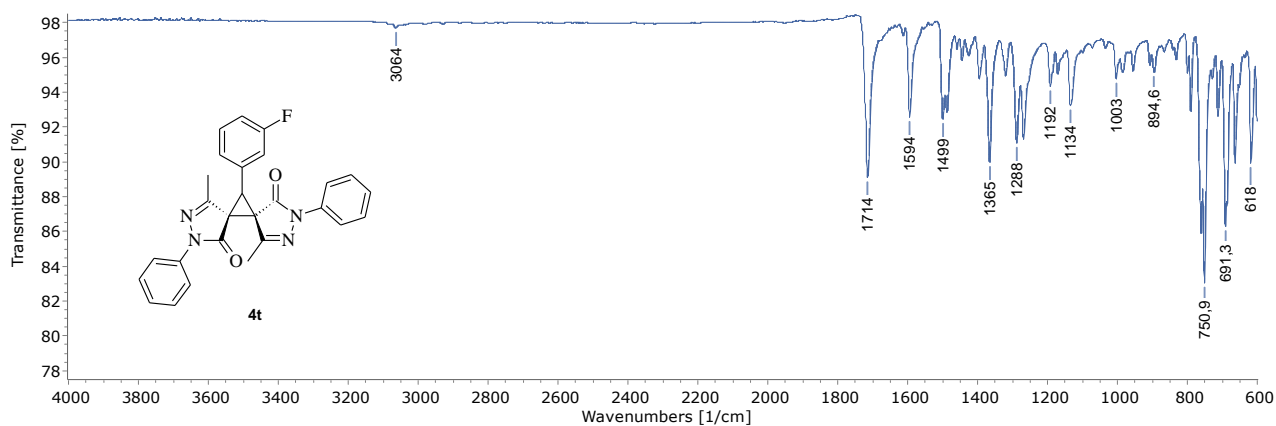

**Figure S77.** FTIR spectrum of compound **4t**

#### Acquisition Parameter

|                   |                |              |           |                          |         |
|-------------------|----------------|--------------|-----------|--------------------------|---------|
| Ion Source Type   | ESI            | Ion Polarity | Positive  | Alternating Ion Polarity | off     |
| Mass Range Mode   | UltraScan      | Scan Begin   | 70 m/z    | Scan End                 | 600 m/z |
| Accumulation Time | 200000 $\mu$ s | RF Level     | 63 %      | Trap Drive               | 54.1    |
| SPS Target Mass   | 400 m/z        | Averages     | 5 Spectra | n/a                      | n/a     |

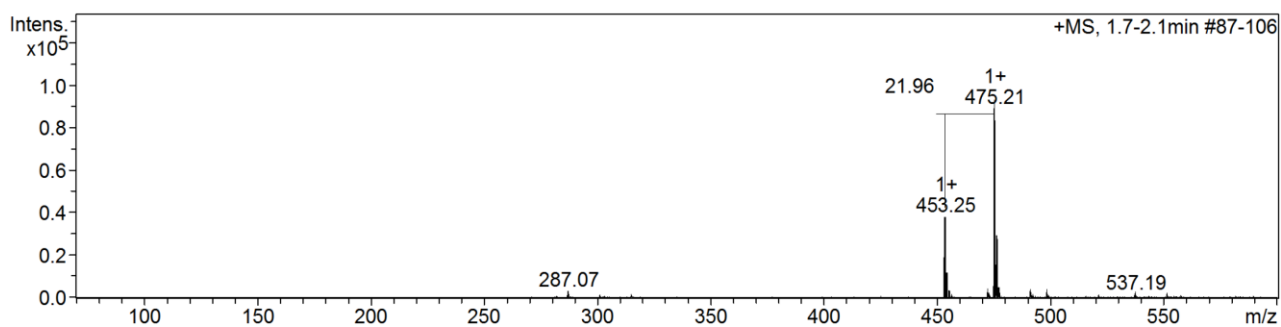

| Component | Molecular Mass | Molecule | Absolute Abundance   | Relative Abundance |        |
|-----------|----------------|----------|----------------------|--------------------|--------|
| A         | 475.19         | 475.53   | [M + H] <sup>+</sup> | 88901              | 100.00 |
| B         | 453.24         | 453.65   | [M + H] <sup>+</sup> | 37933              | 42.67  |

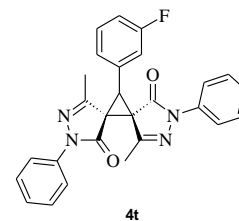

**Figure S78.** ESI-MS spectrum of compound **4t**

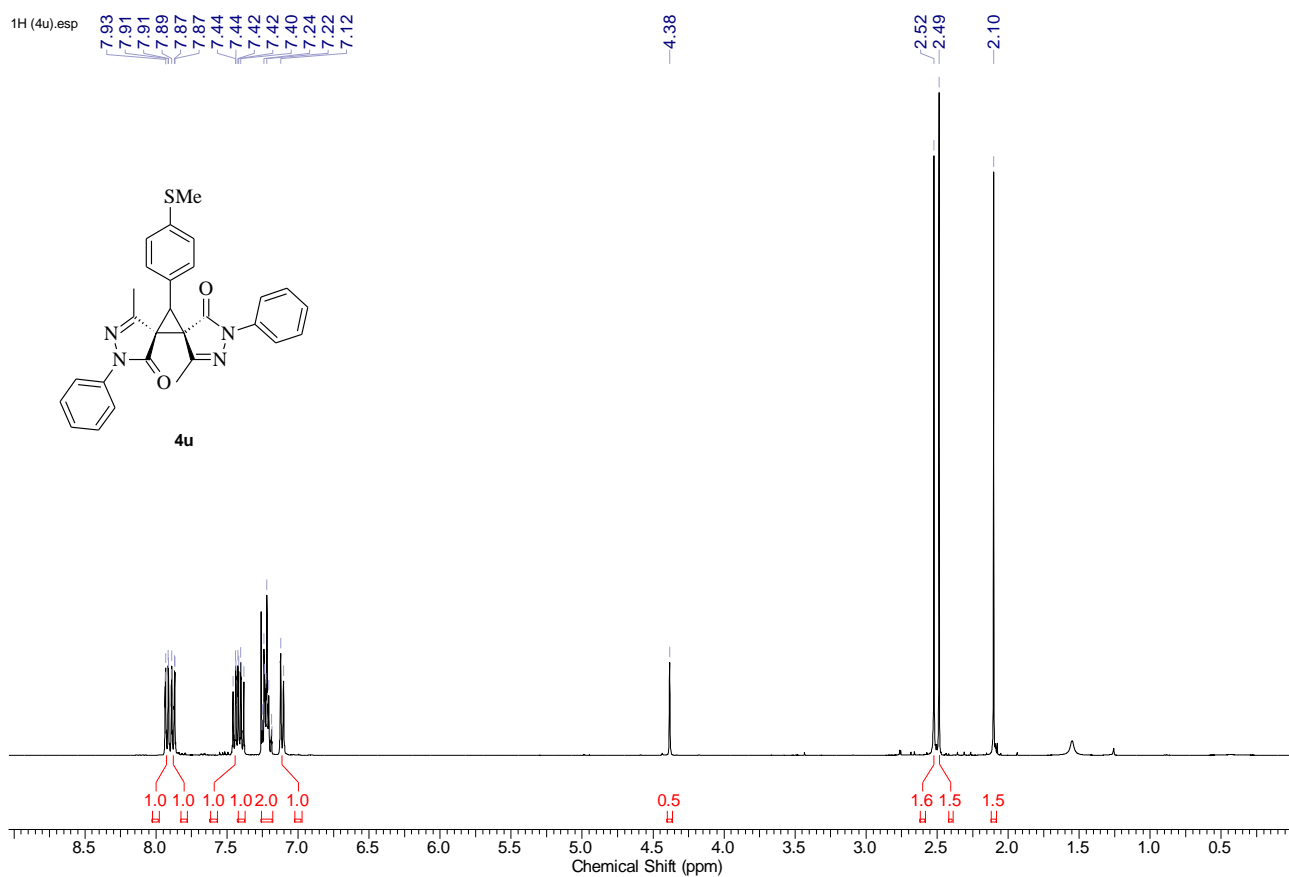

Figure S79. <sup>1</sup>H NMR spectrum of compound **4u**

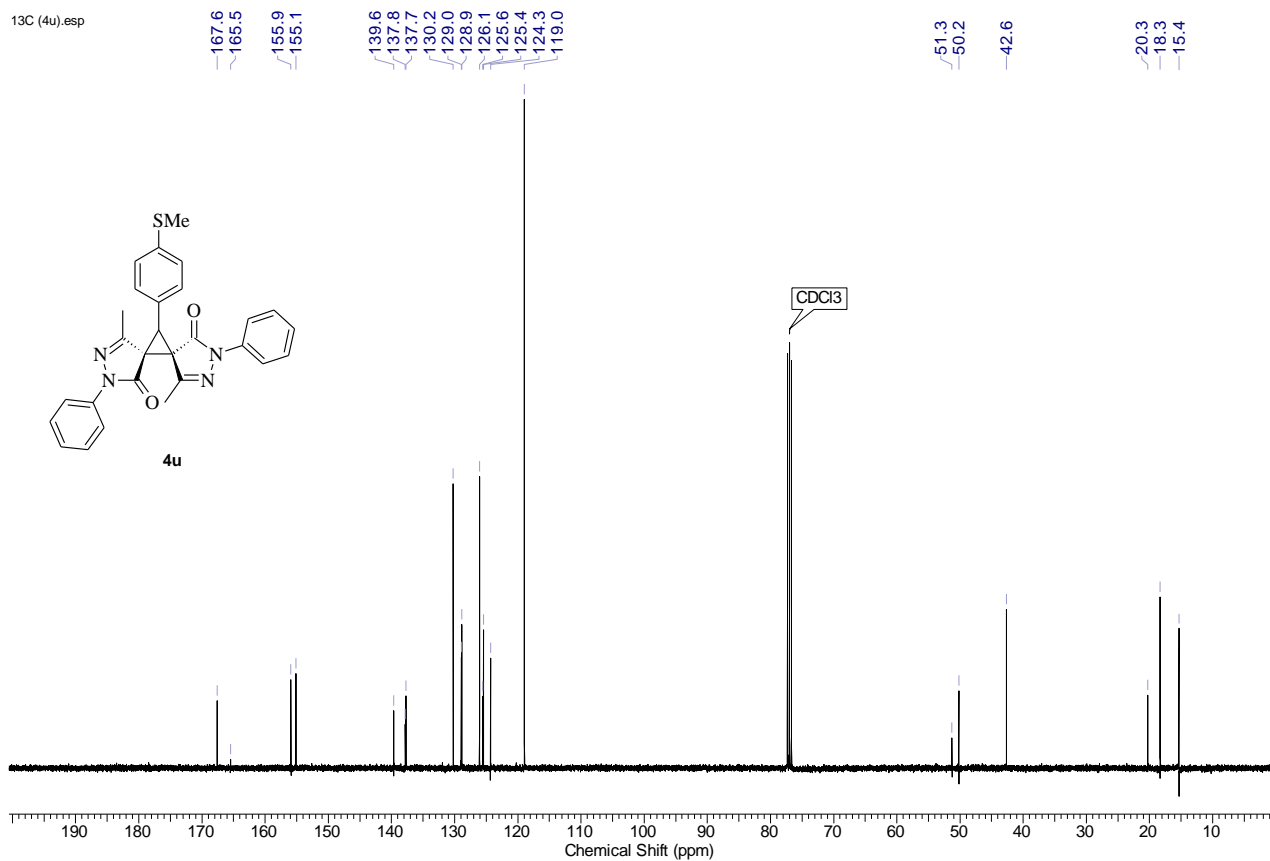

Figure S80. <sup>13</sup>C NMR spectrum of compound **4u**

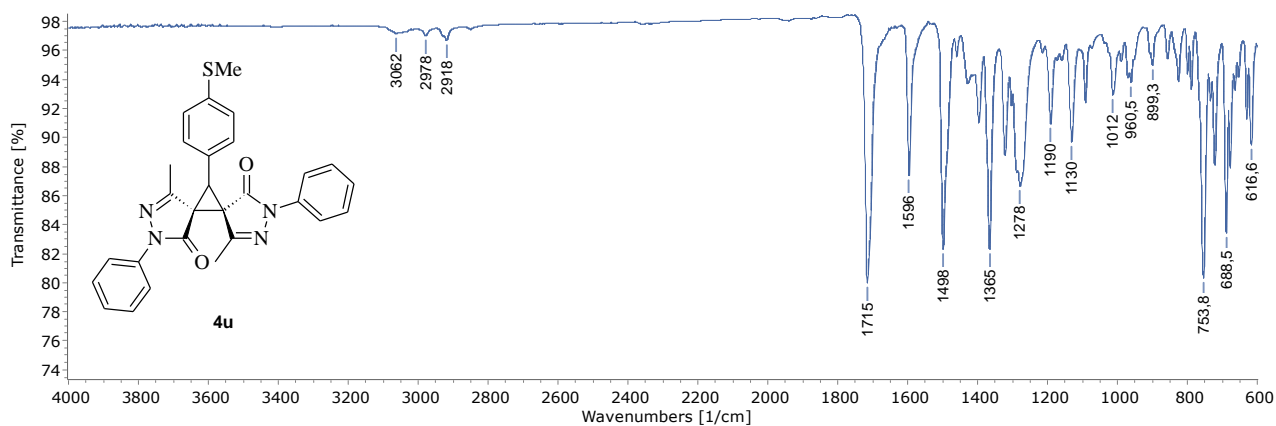

Figure S81. FTIR spectrum of compound **4u**

#### Acquisition Parameter

|                   |                |              |           |                          |         |
|-------------------|----------------|--------------|-----------|--------------------------|---------|
| Ion Source Type   | ESI            | Ion Polarity | Positive  | Alternating Ion Polarity | off     |
| Mass Range Mode   | UltraScan      | Scan Begin   | 70 m/z    | Scan End                 | 600 m/z |
| Accumulation Time | 200000 $\mu$ s | RF Level     | 63 %      | Trap Drive               | 54.1    |
| SPS Target Mass   | 400 m/z        | Averages     | 5 Spectra | n/a                      | n/a     |

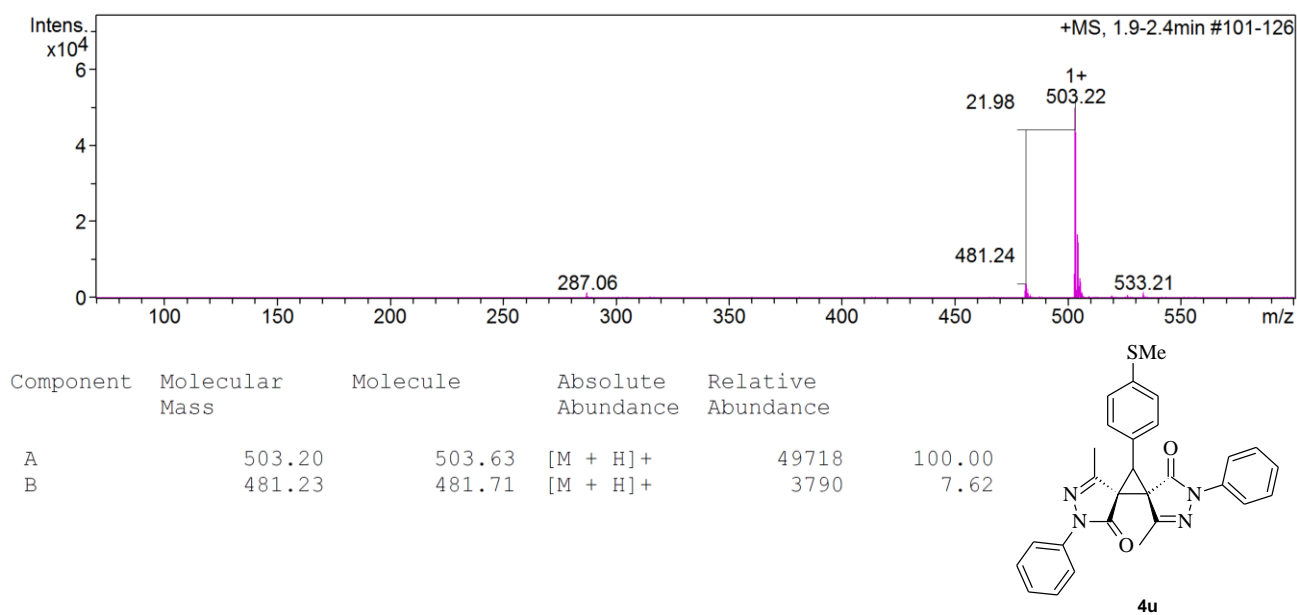

Figure S82. ESI-MS spectrum of compound **4u**

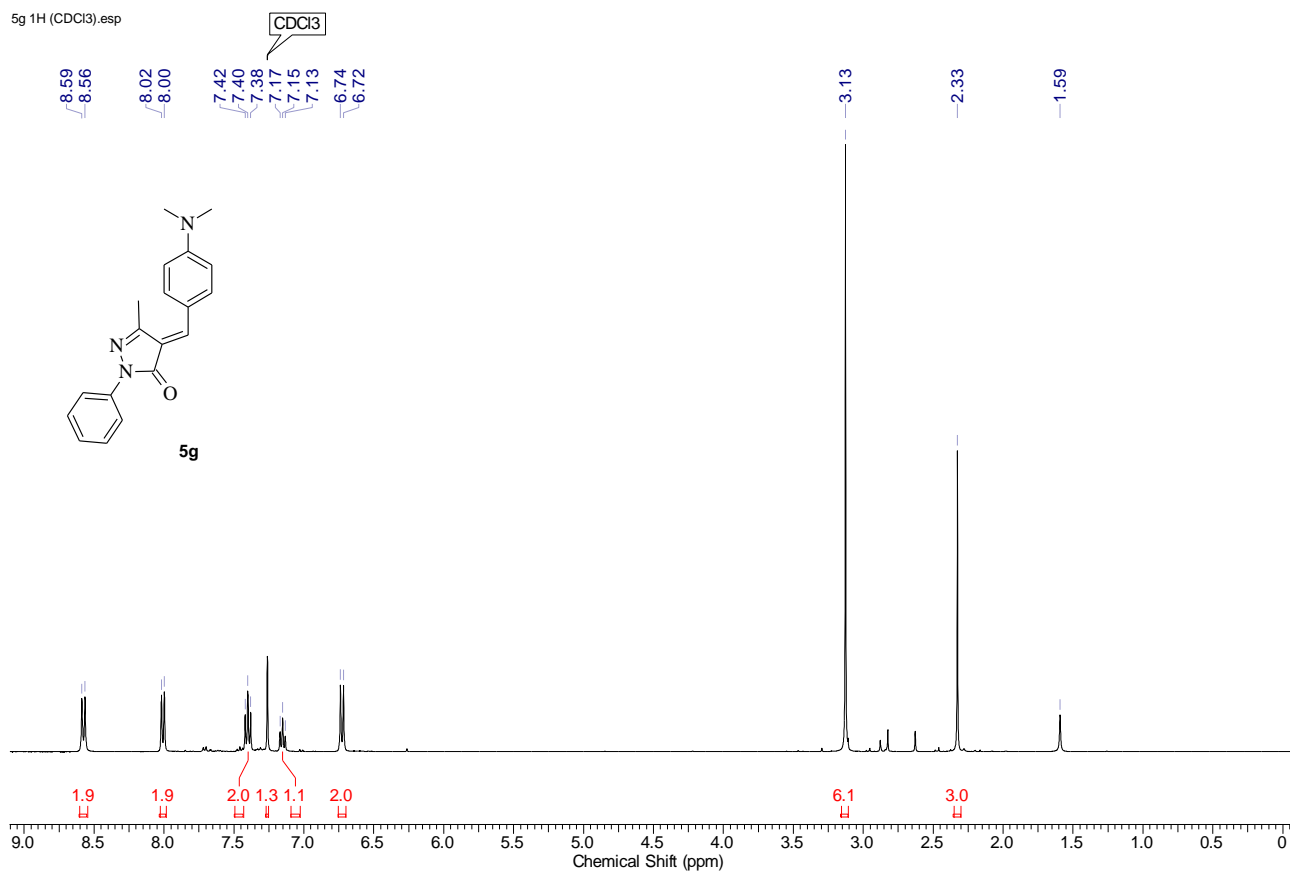

Figure S83. <sup>1</sup>H NMR spectrum of compound 5g

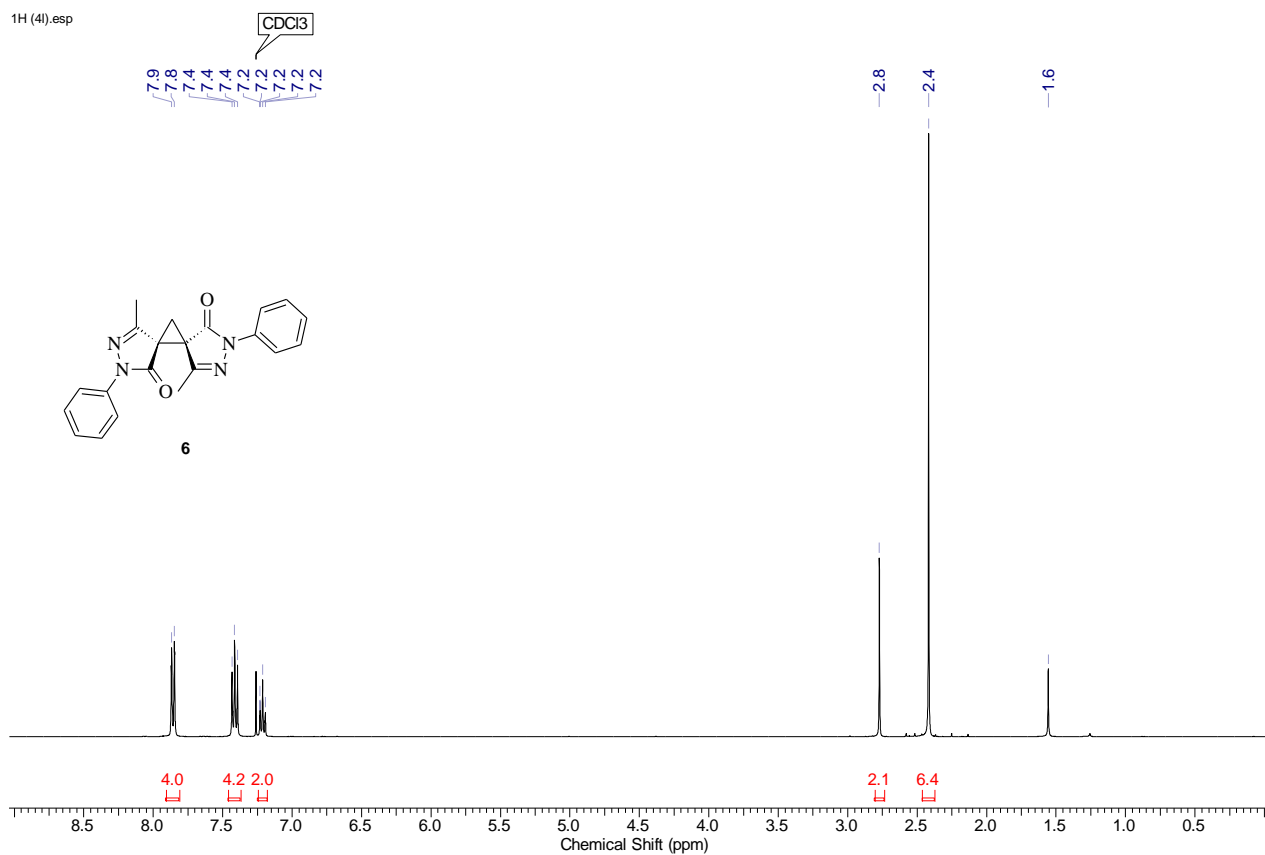

Figure S84. <sup>1</sup>H NMR spectrum of compound 6

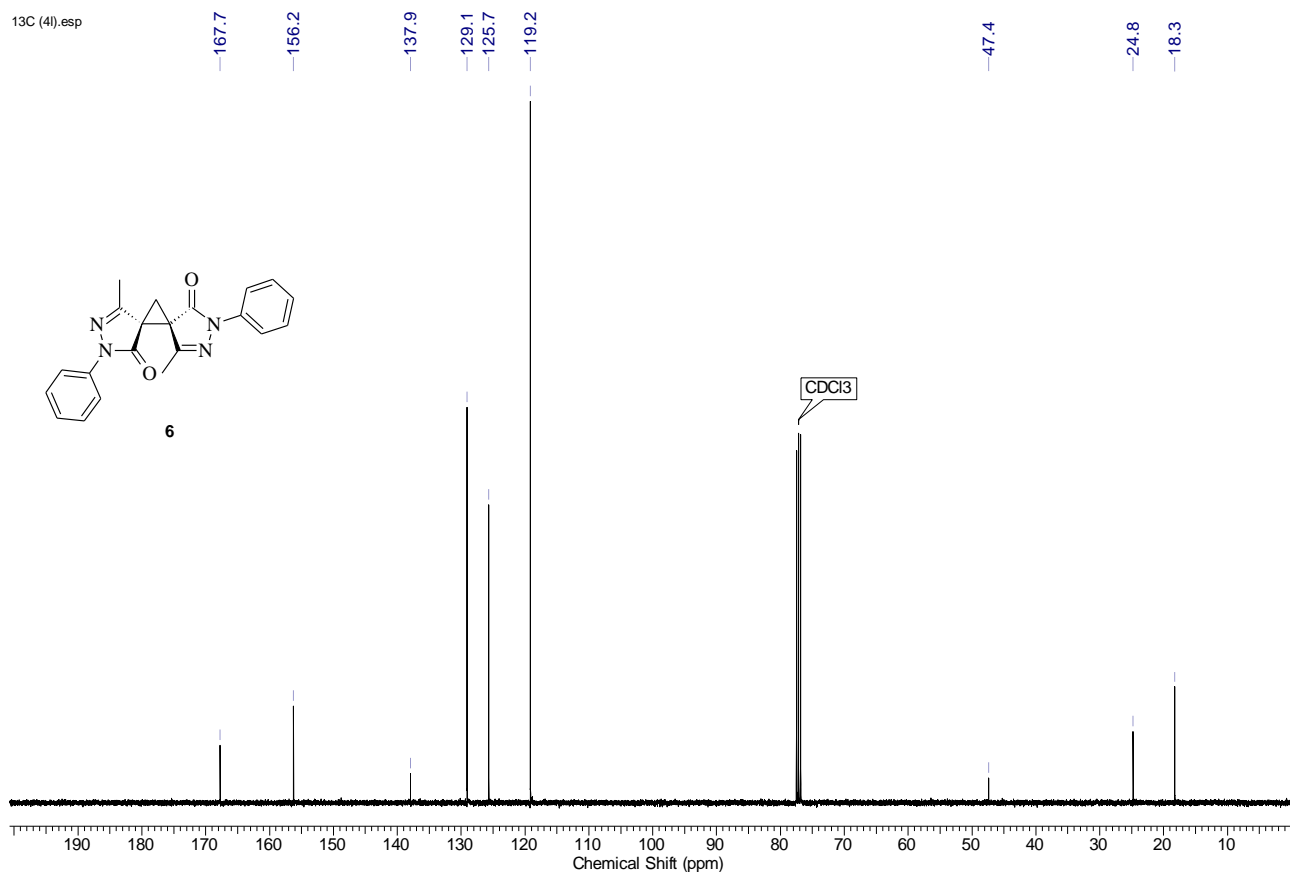

Figure S85. <sup>13</sup>C NMR spectrum of compound 6

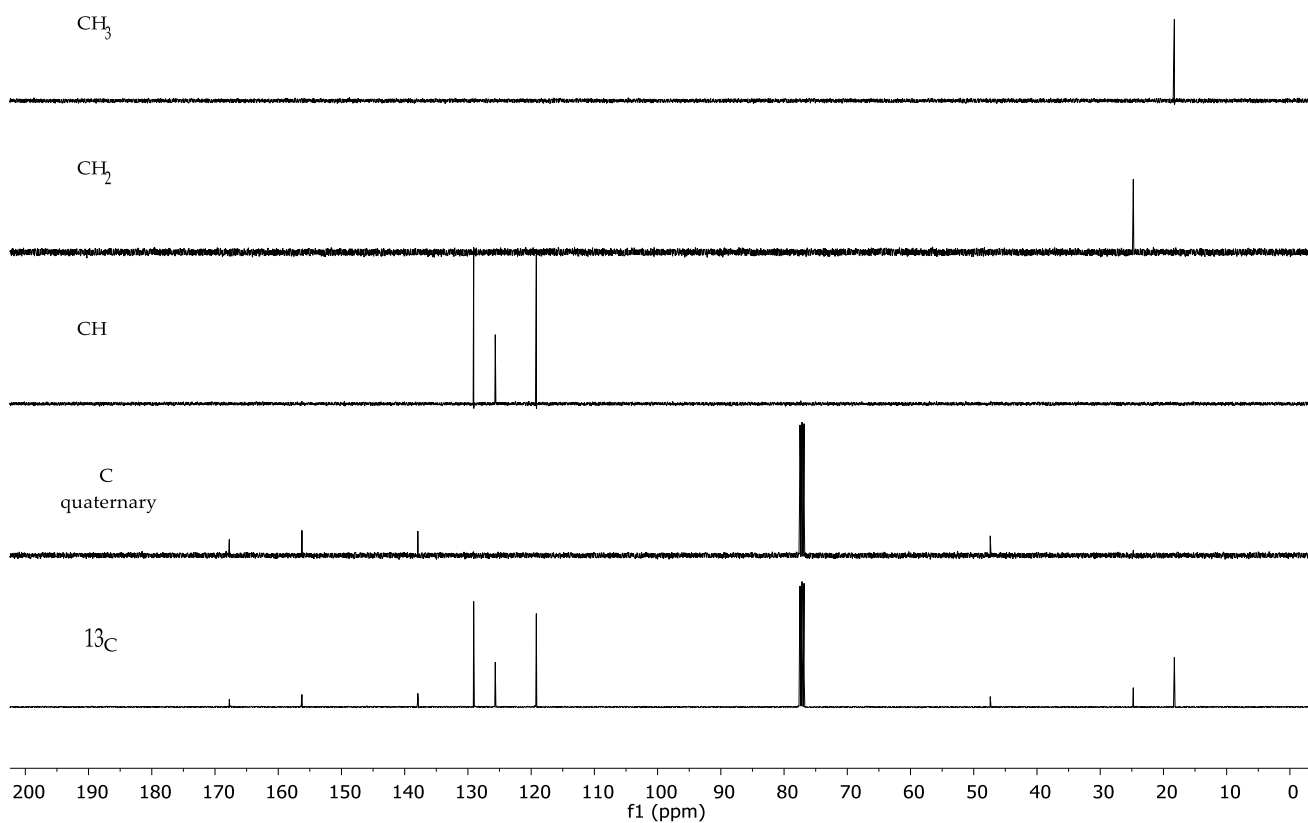

Figure S86. DEPT spectrum of compound 6

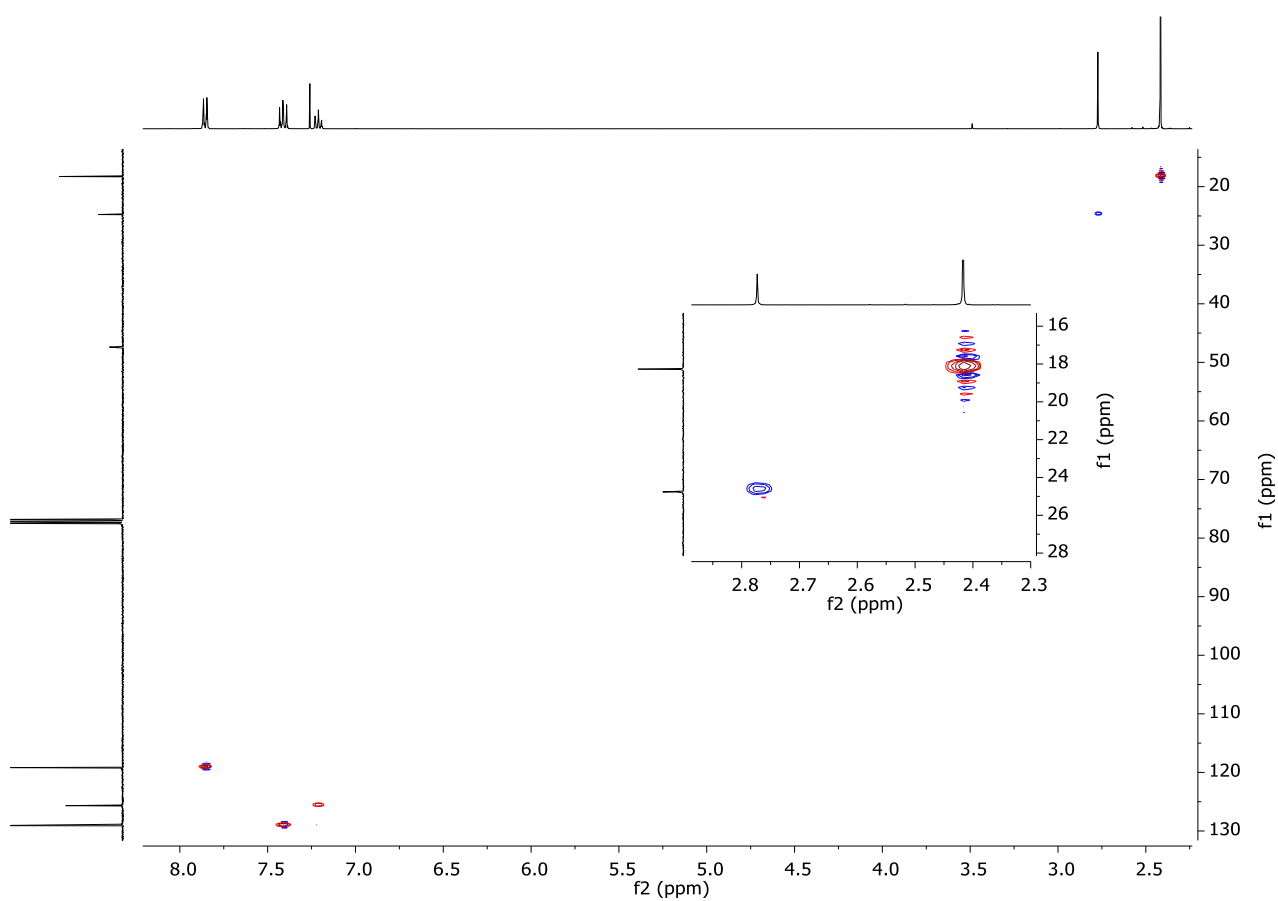

Figure S87. HSQC spectrum of compound 6

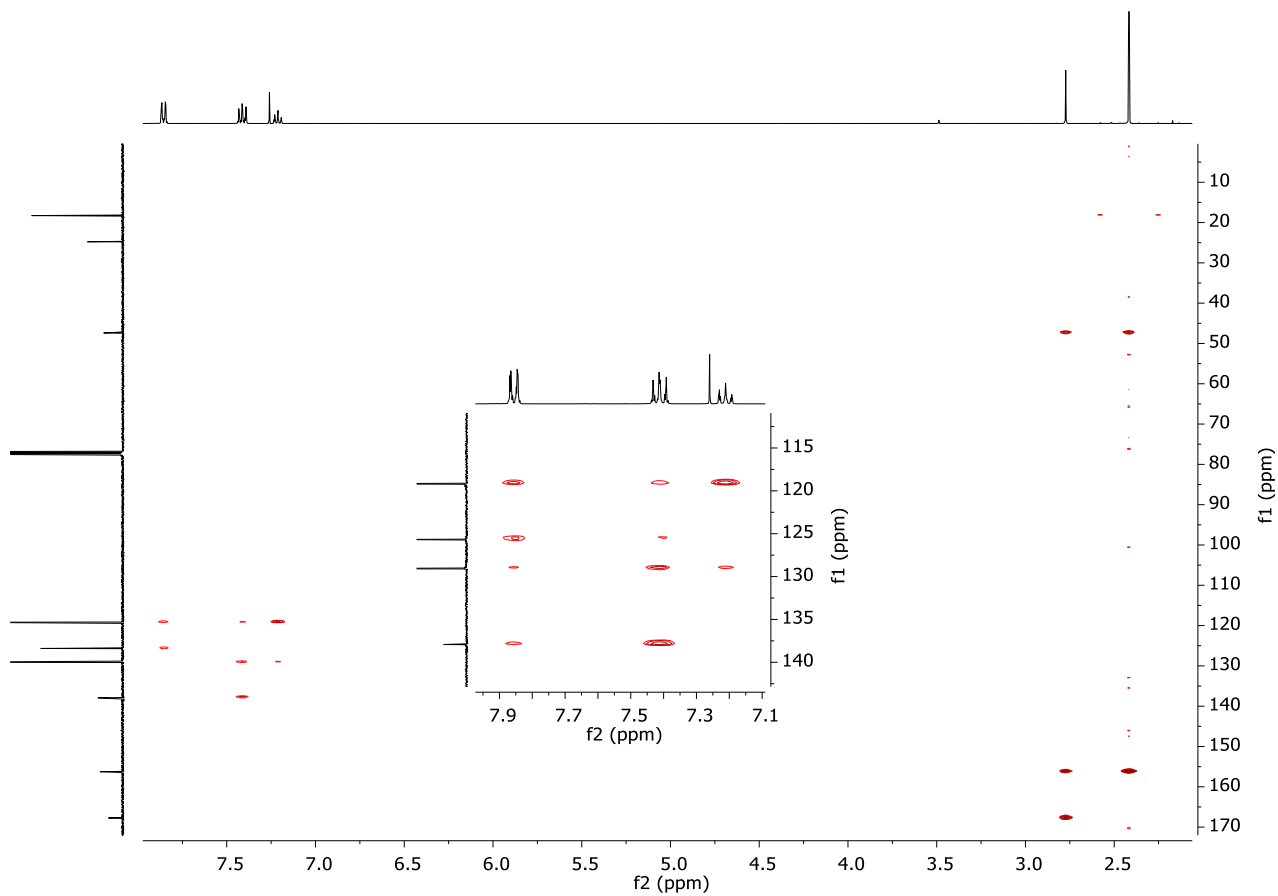

Figure S88. HMBC spectrum of compound 6



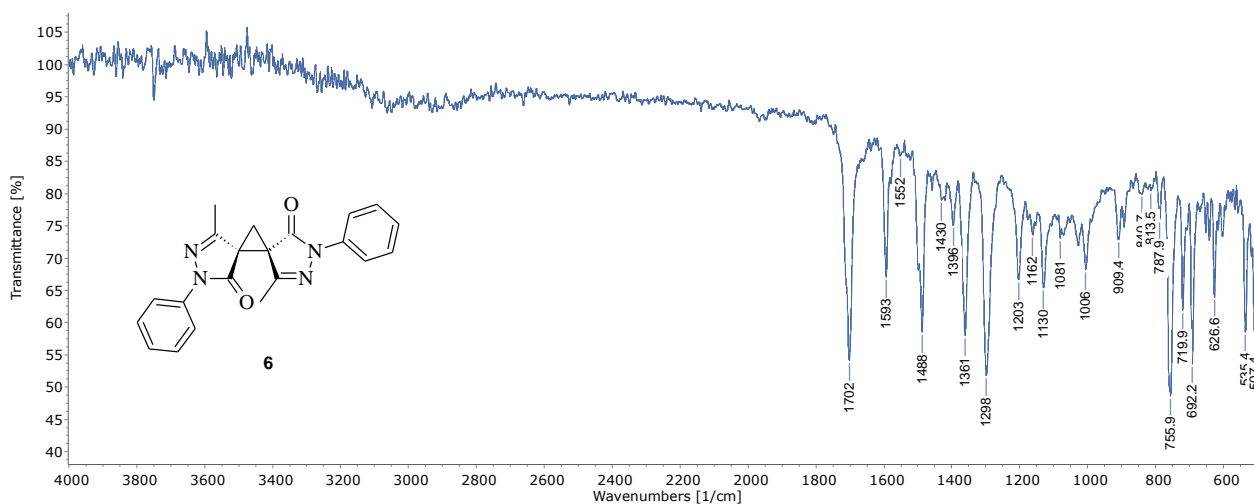

Figure S89. FTIR spectrum of compound 6

#### Acquisition Parameter

|                   |                |              |           |                          |         |
|-------------------|----------------|--------------|-----------|--------------------------|---------|
| Ion Source Type   | ESI            | Ion Polarity | Positive  | Alternating Ion Polarity | off     |
| Mass Range Mode   | UltraScan      | Scan Begin   | 70 m/z    | Scan End                 | 600 m/z |
| Accumulation Time | 200000 $\mu$ s | RF Level     | 63 %      | Trap Drive               | 54.1    |
| SPS Target Mass   | 400 m/z        | Averages     | 5 Spectra | n/a                      | n/a     |

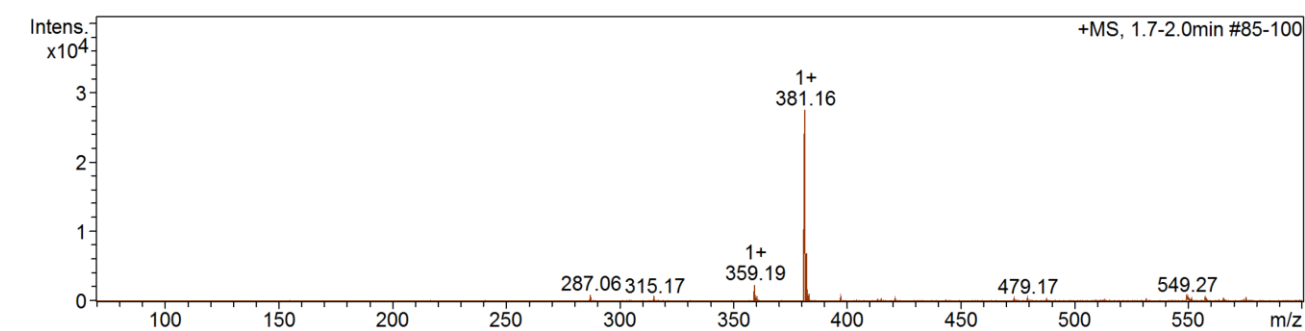

| Component | Molecular Mass | Molecule | Absolute Abundance   | Relative Abundance |        |
|-----------|----------------|----------|----------------------|--------------------|--------|
| A         | 381.15         | 381.42   | [M + H] <sup>+</sup> | 27417              | 100.00 |
| B         | 359.19         | 359.55   | [M + H] <sup>+</sup> | 2350               | 8.57   |

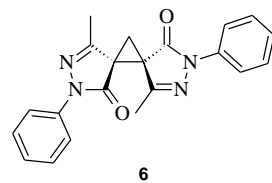

Figure S90. ESI-MS spectrum of compound 6

**Table S1.** Percentage (%) of inhibition of five human cancer cell lines, and immortalized cell CHO K-1 exposed 48 h to 100  $\mu$ M of each bis(spiropyrazolone)cyclopropanes **4**.

|            | <b>RKO</b>       | <b>PC-3</b>      | <b>A-549</b>     | <b>MCF-7</b>     | <b>HeLa</b>      | <b>CHO-K1</b>   |
|------------|------------------|------------------|------------------|------------------|------------------|-----------------|
| <b>4b</b>  | 21.74 $\pm$ 2.37 | 17.56 $\pm$ 2.83 | NA               | 7.87 $\pm$ 2.92  | NA               | 5.76 $\pm$ 3.08 |
| <b>4c</b>  | 37.29 $\pm$ 1.22 | 11.03 $\pm$ 3.50 | 6.10 $\pm$ 0.86  | 16.69 $\pm$ 5.36 | 24.80 $\pm$ 1.74 | 2.62 $\pm$ 2.20 |
| <b>4d</b>  | 68.88 $\pm$ 1.72 | 46.08 $\pm$ 1.91 | 13.64 $\pm$ 0.74 | 39.41 $\pm$ 2.29 | 48.56 $\pm$ 4.91 | 4.40 $\pm$ 0.72 |
| <b>4e</b>  | 36.77 $\pm$ 1.55 | 17.93 $\pm$ 3.40 | 7.97 $\pm$ 1.46  | 4.47 $\pm$ 3.48  | 47.84 $\pm$ 2.45 | NA              |
| <b>4f</b>  | 28.74 $\pm$ 0.29 | 28.32 $\pm$ 2.56 | 10.36 $\pm$ 3.28 | NA               | NA               | 2.79 $\pm$ 1.49 |
| <b>4k</b>  | 67.59 $\pm$ 0.77 | 46.72 $\pm$ 3.78 | 26.71 $\pm$ 3.03 | 43.03 $\pm$ 3.46 | 47.22 $\pm$ 1.36 | NA              |
| <b>4p</b>  | 18.59 $\pm$ 1.37 | 5.25 $\pm$ 2.60  | 9.08 $\pm$ 1.14  | 13.64 $\pm$ 2.55 | 5.98 $\pm$ 2.19  | 1.95 $\pm$ 1.42 |
| <b>4q</b>  | 62.87 $\pm$ 1.53 | 50.51 $\pm$ 2.38 | 13.00 $\pm$ 1.99 | 32.48 $\pm$ 2.33 | 31.72 $\pm$ 1.52 | 2.29 $\pm$ 2.60 |
| <b>4r</b>  | 64.71 $\pm$ 0.52 | 54.66 $\pm$ 1.95 | 28.65 $\pm$ 3.71 | 45.75 $\pm$ 2.11 | 50.16 $\pm$ 0.52 | 4.74 $\pm$ 3.04 |
| <b>4s</b>  | 70.23 $\pm$ 1.19 | 49.74 $\pm$ 2.11 | 24.42 $\pm$ 1.36 | 9.91 $\pm$ 3.37  | 43.56 $\pm$ 1.75 | NA              |
| <b>4t</b>  | 47.57 $\pm$ 0.95 | 13.81 $\pm$ 2.87 | 3.43 $\pm$ 2.42  | 31.41 $\pm$ 3.65 | 5.06 $\pm$ 2.43  | 5.08 $\pm$ 2.84 |
| <b>4u</b>  | 40.96 $\pm$ 1.49 | 38.68 $\pm$ 3.77 | 3.64 $\pm$ 1.81  | 19.51 $\pm$ 2.96 | 34.73 $\pm$ 2.29 | 5.76 $\pm$ 3.65 |
| <b>Dox</b> | 85.63 $\pm$ 1.06 | 87.98 $\pm$ 1.65 | 9.16 $\pm$ 2.16  | 46.23 $\pm$ 7.77 | 9.18 $\pm$ 9.55  | 2.62 $\pm$ 1.42 |

Data are given as mean and standard error (SEM) of at least three independent experiments; NA: No activity; Dox: Doxorubicin (1  $\mu$ M).

**Table S2.** Inhibitory activity of bis(spiropyrazolone)cyclopropanes **4** against *S. cerevisiae* (W303 background).

|           | <i>S. cerevisiae</i> |
|-----------|----------------------|
|           | <b>W303</b>          |
| <b>4b</b> | 1377.67 $\pm$ 303.94 |
| <b>4c</b> | NA                   |
| <b>4d</b> | NA                   |
| <b>4e</b> | NA                   |
| <b>4f</b> | NA                   |
| <b>4k</b> | NA                   |
| <b>4p</b> | NA                   |
| <b>4q</b> | 1087.00 $\pm$ 38.50  |
| <b>4r</b> | 1270.00 $\pm$ 118.82 |
| <b>4s</b> | 789.03 $\pm$ 37.29   |
| <b>4t</b> | NA                   |
| <b>4u</b> | NA                   |

**Table S3.** DPPH scavenging activity of bis(spiropyrazolone)cyclopropanes **4**.

| DPPH scavenging activity |                          |
|--------------------------|--------------------------|
|                          | IC <sub>50</sub> $\mu$ M |
| <b>4b</b>                | > 300                    |
| <b>4c</b>                | > 300                    |
| <b>4d</b>                | > 300                    |
| <b>4e</b>                | > 300                    |
| <b>4f</b>                | > 300                    |
| <b>4k</b>                | 233.8                    |
| <b>4p</b>                | > 300                    |
| <b>4q</b>                | > 300                    |
| <b>4r</b>                | > 300                    |
| <b>4s</b>                | > 300                    |
| <b>4t</b>                | > 300                    |
| <b>4u</b>                | > 300                    |
| <b>Ascorbic acid</b>     | 14.0                     |
| <b>Ampho B</b>           | ND                       |

**Statistical Analyses S1.** Test for statistical significance were based on one-way ANOVA test applied to leishmanicidal and cytotoxicity activities of bis(spiropyrazolone)cyclopropanes **4** (Table 3).

```
>bartlett.test(log(IC50+1)~Drug)
```

Bartlett test of homogeneity of variances

data: log(IC50 + 1) by Drug

Bartlett's K-squared = 18.182, df = 12, p-value = 0.1103

```
> ic50m=lm(log(IC50+1)~Drug)
```

```
> anova(ic50m)
```

Analysis of Variance Table

Response: log(IC50 + 1)

|           | Df | Sum Sq  | Mean Sq  | F value | Pr(>F)        |
|-----------|----|---------|----------|---------|---------------|
| Drug      | 12 | 3.01683 | 0.251403 | 46.477  | 6.327e-12 *** |
| Residuals | 20 | 0.10818 | 0.005409 |         |               |

---

Signif. codes: 0 '\*\*\*' 0.001 '\*\*' 0.01 '\*' 0.05 '.' 0.1 ' ' 1

Study: ic50m ~ "Drug"

HSD Test for log(IC50 + 1)

Mean Square Error: 0.005409134

Drug, means

|               | log <sub>10</sub> IC <sub>50</sub> ... | std         | r | Min       | Max       |
|---------------|----------------------------------------|-------------|---|-----------|-----------|
| 4b            | 0.1463159                              | 0.003543739 | 3 | 0.1431475 | 0.1501427 |
| 4c            | 0.1397771                              | 0.034249039 | 3 | 0.1045402 | 0.1729444 |
| 4d            | 0.1377132                              | 0.013678017 | 2 | 0.1280413 | 0.1473850 |
| 4e            | 0.9040759                              | 0.103044742 | 3 | 0.7943491 | 0.9987920 |
| 4f            | 1.1732861                              | 0.022310818 | 2 | 1.1575099 | 1.1890622 |
| 4k            | 0.2568298                              | 0.074736324 | 3 | 0.1709235 | 0.3068963 |
| 4p            | 0.4487139                              | 0.146863896 | 2 | 0.3448655 | 0.5525624 |
| 4q            | 0.2442968                              | 0.033416047 | 3 | 0.2147887 | 0.2805819 |
| 4r            | 0.1716096                              | 0.051448633 | 2 | 0.1352299 | 0.2079893 |
| 4s            | 0.1719498                              | 0.057499706 | 2 | 0.1312914 | 0.2126082 |
| 4t            | 0.1948935                              | 0.041308595 | 2 | 0.1656839 | 0.2241031 |
| 4u            | 0.3409402                              | 0.174190218 | 2 | 0.2177691 | 0.4641113 |
| Amphotericina | 0.1573406                              | 0.060319051 | 4 | 0.1024663 | 0.2312704 |

Alpha: 0.05 ; DF Error: 20

Critical Value of Studentized Range: 5.281538

Groups according to probability of means differences and alpha level( 0.05 )

Treatments with the same letter are not significantly different.

|               | log(IC <sub>50</sub> + 1) | groups |
|---------------|---------------------------|--------|
| 4f            | 1.1732861                 | a      |
| 4e            | 0.9040759                 | b      |
| 4p            | 0.4487139                 | c      |
| 4u            | 0.3409402                 | cd     |
| 4k            | 0.2568298                 | cd     |
| 4q            | 0.2442968                 | cd     |
| 4t            | 0.1948935                 | cd     |
| 4s            | 0.1719498                 | d      |
| 4r            | 0.1716096                 | d      |
| Amphotericina | 0.1573406                 | d      |
| 4b            | 0.1463159                 | d      |
| 4c            | 0.1397771                 | d      |
| 4d            | 0.1377132                 | d      |

Original values:

|   | Group.1 | x.1 (Mean)  | x.2 (SD)    |
|---|---------|-------------|-------------|
| 1 | 4b      | 0.157566667 | 0.004104063 |
| 2 | 4c      | 0.150466667 | 0.039335650 |
| 3 | 4d      | 0.147700000 | 0.015697771 |
| 4 | 4e      | 1.478333333 | 0.252224767 |

|    |               |             |             |
|----|---------------|-------------|-------------|
| 5  | 4f            | 2.233000000 | 0.072124892 |
| 6  | 4k            | 0.295200000 | 0.094711351 |
| 7  | 4p            | 0.574750000 | 0.230446100 |
| 8  | 4q            | 0.277200000 | 0.042880415 |
| 9  | 4r            | 0.188000000 | 0.061094026 |
| 10 | 4s            | 0.188600000 | 0.068306515 |
| 11 | 4t            | 0.215700000 | 0.050204581 |
| 12 | 4u            | 0.416950000 | 0.245578185 |
| 13 | Amphotericina | 0.172000000 | 0.071210158 |

```
> bartlett.test(log(CC50)~Drug)
```

Bartlett test of homogeneity of variances

data: log(CC50) by Drug

Bartlett's K-squared = 8.5922, df = 11, p-value = 0.6595

Analysis of Variance Table

```
Response:      log(CC50)
             Df Sum Sq Mean Sq F value Pr(>F)
Drug          11  10.3815  0.94377  11.409 8.51e-08 ***
Residuals     29   2.3989  0.08272
```

---

Signif. codes: 0 '\*\*\*' 0.001 '\*\*' 0.01 '\*' 0.05 '.' 0.1 ' ' 1

```
> HSD.test(CC50,"Drug",console=T)
```

Study: CC50m~ "Drug"

HSD Test for log(CC50)

Mean Square Error: 0.08271965

Drug, means

|    | log(CC50. | std        | r | Min       | Max      |
|----|-----------|------------|---|-----------|----------|
| 4b | 1.1719100 | 0.43666050 | 3 | 0.7323679 | 1.605631 |
| 4c | 0.8128903 | 0.06772344 | 2 | 0.7650026 | 0.860778 |
| 4d | 1.3342413 | 0.29842066 | 4 | 0.9783261 | 1.625705 |
| 4e | 1.9649729 | 0.28245877 | 2 | 1.7652444 | 2.164701 |
| 4f | 2.5482028 | 0.09670494 | 3 | 2.4379897 | 2.618855 |
| 4k | 1.1645144 | 0.32332882 | 3 | 0.7911809 | 1.354029 |
| 4p | 1.2466569 | 0.23752428 | 3 | 1.0466170 | 1.509175 |
| 4q | 1.3739465 | 0.18446436 | 5 | 1.1568812 | 1.658228 |
| 4r | 1.8612149 | 0.14882827 | 4 | 1.6420987 | 1.957698 |

|    |           |            |   |           |          |
|----|-----------|------------|---|-----------|----------|
| 4s | 2.1056371 | 0.39517555 | 3 | 1.6787774 | 2.458734 |
| 4t | 0.9820859 | 0.27456625 | 5 | 0.5300398 | 1.229641 |
| 4u | 2.1711028 | 0.41188059 | 4 | 1.6152212 | 2.511224 |

Alpha: 0.05 ; DF Error: 29

Critical Value of Studentized Range: 5.014273

Groups according to probability of means differences and alpha level( 0.05 )

Treatments with the same letter are not significantly different.

log(CC50) groups

|    |           |     |
|----|-----------|-----|
| 4f | 2.5482028 | a   |
| 4u | 2.1711028 | a   |
| 4s | 2.1056371 | ab  |
| 4e | 1.9649729 | abc |
| 4r | 1.8612149 | abc |
| 4q | 1.3739465 | bcd |
| 4d | 1.3342413 | bcd |
| 4p | 1.2466569 | cd  |
| 4b | 1.1719100 | cd  |
| 4k | 1.1645144 | cd  |
| 4t | 0.9820859 | d   |
| 4c | 0.8128903 | d   |

Original values:

|    | Group.1 | x.1 (Mean) | x.2(sd)   |
|----|---------|------------|-----------|
| 1  | 4b      | 3.4360000  | 1.4597058 |
| 2  | 4c      | 2.2570000  | 0.1527351 |
| 3  | 4d      | 3.9225000  | 1.1214757 |
| 4  | 4e      | 7.2775000  | 2.0286894 |
| 5  | 4f      | 12.8233333 | 1.2077389 |
| 6  | 4k      | 3.3100000  | 0.9561553 |
| 7  | 4p      | 3.5463333  | 0.8714978 |
| 8  | 4q      | 4.0066000  | 0.7724440 |
| 9  | 4r      | 6.4827500  | 0.8992754 |
| 10 | 4s      | 8.6300000  | 3.1707698 |
| 11 | 4t      | 2.7450000  | 0.6646112 |
| 12 | 4u      | 9.2952500  | 3.3663162 |

**Statistical Analyses S1.** Kruskal Wallis test's applied to comet assay of *Leishmania mexicana* cells exposed to bis(spiropyrazolone)cyclopropanes **4** (Figure 2).

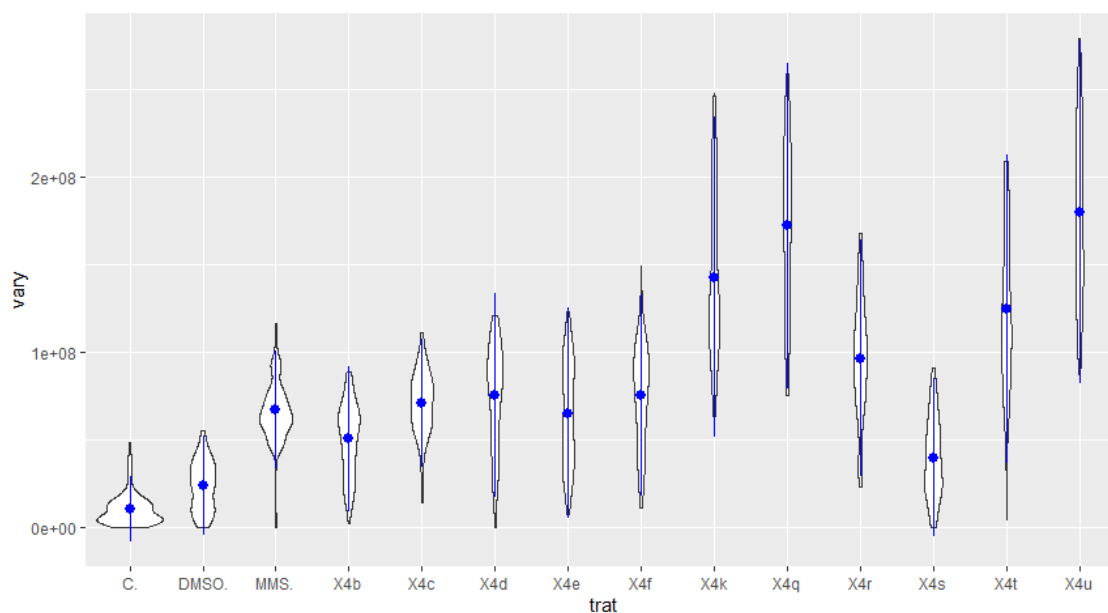

Study: Trat  
Kruskal-Wallis test's  
Ties or no Ties

Critical Value: 1004.543  
Degrees of freedom: 13  
Pvalue Chisq : 0

trat, means of the ranks

| trat  | mean     | r   |
|-------|----------|-----|
| C.    | 97.280   | 100 |
| DMSO. | 207.115  | 100 |
| MMS.  | 606.840  | 100 |
| X4b   | 449.315  | 100 |
| X4c   | 648.065  | 100 |
| X4d   | 694.660  | 100 |
| X4e   | 595.490  | 100 |
| X4f   | 691.135  | 100 |
| X4k   | 1111.660 | 100 |
| X4q   | 1208.625 | 80  |
| X4r   | 861.180  | 100 |
| X4s   | 352.245  | 100 |
| X4t   | 1016.210 | 100 |
| X4u   | 1230.805 | 100 |

## Post Hoc Analysis

P value adjustment method: bonferroni

t-Student: 3.463614

Alpha : 0.05

Groups according to probability of treatment differences and alpha level.

Treatments with the same letter are not significantly different.

```

vary groups
X4u 1230.805  a
X4q 1208.625  ab
X4k 1111.660  bc
X4t 1016.210  c
X4r  861.180  d
X4d  694.660  e
X4f  691.135  e
X4c  648.065  e
MMS. 606.840  e
X4e  595.490  e
X4b  449.315  f
X4s  352.245  f
DMSO. 207.115  g
C.    97.280   h

```

## \$statistics

```

Chisq Df p.chisq
1004.543 13    0

```

## \$parameters

```

test p.adjusted name.t ntr alpha
Kruskal-Wallis bonferroni  trat 14 0.05

```

## \$means

```

vary rank std r Min Max Q25 Q50 Q75
C. 10290000 97.280 9224796 100 0.0e+00 4.80e+07 4000000 8000000 14000000
DMSO. 23610000 207.115 14071890 100 0.0e+00 5.50e+07 11000000 25000000 35000000
MMS. 67050000 606.840 16924894 100 0.0e+00 1.16e+08 58000000 65000000 74250000
X4b 50400000 449.315 20682301 100 2.0e+06 8.90e+07 32750000 55000000 64000000
X4c 70710000 648.065 18193847 100 1.4e+07 1.11e+08 58750000 72500000 83250000
X4d 75120000 694.660 29056295 100 0.0e+00 1.21e+08 52000000 83500000 97250000
X4e 65120000 595.490 29979549 100 7.0e+06 1.23e+08 39750000 64500000 90250000
X4f 75100000 691.135 28784641 100 1.1e+07 1.49e+08 55000000 80500000 99000000
X4k 142780000 1111.660 45723716 100 6.3e+07 2.48e+08 110000000 128000000 182500000
X4q 172025000 1208.625 46560965 80 7.5e+07 2.59e+08 129750000 177500000 205750000
X4r 96310000 861.180 33823277 100 2.3e+07 1.68e+08 76500000 98500000 117500000
X4s 39720000 352.245 22688528 100 0.0e+00 9.10e+07 23000000 39500000 55250000
X4t 124410000 1016.210 44002317 100 4.0e+06 2.09e+08 95250000 116000000 157000000
X4u 179560000 1230.805 48875087 100 8.7e+07 2.79e+08 142000000 177500000 223000000

```



\$comparison

|              | Difference | pvalue | Signif. | LCL          | UCL          |
|--------------|------------|--------|---------|--------------|--------------|
| C. - DMSO.   | -109.835   | 0.0187 | *       | -212.036162  | -7.633838    |
| C. - MMS.    | -509.560   | 0.0000 | ***     | -611.761162  | -407.358838  |
| C. - X4b     | -352.035   | 0.0000 | ***     | -454.236162  | -249.833838  |
| C. - X4c     | -550.785   | 0.0000 | ***     | -652.986162  | -448.583838  |
| C. - X4d     | -597.380   | 0.0000 | ***     | -699.581162  | -495.178838  |
| C. - X4e     | -498.210   | 0.0000 | ***     | -600.411162  | -396.008838  |
| C. - X4f     | -593.855   | 0.0000 | ***     | -696.056162  | -491.653838  |
| C. - X4k     | -1014.380  | 0.0000 | ***     | -1116.581162 | -912.178838  |
| C. - X4q     | -1111.345  | 0.0000 | ***     | -1219.745702 | -1002.944298 |
| C. - X4r     | -763.900   | 0.0000 | ***     | -866.101162  | -661.698838  |
| C. - X4s     | -254.965   | 0.0000 | ***     | -357.166162  | -152.763838  |
| C. - X4t     | -918.930   | 0.0000 | ***     | -1021.131162 | -816.728838  |
| C. - X4u     | -1133.525  | 0.0000 | ***     | -1235.726162 | -1031.323838 |
| DMSO. - MMS. | -399.725   | 0.0000 | ***     | -501.926162  | -297.523838  |
| DMSO. - X4b  | -242.200   | 0.0000 | ***     | -344.401162  | -139.998838  |
| DMSO. - X4c  | -440.950   | 0.0000 | ***     | -543.151162  | -338.748838  |
| DMSO. - X4d  | -487.545   | 0.0000 | ***     | -589.746162  | -385.343838  |
| DMSO. - X4e  | -388.375   | 0.0000 | ***     | -490.576162  | -286.173838  |
| DMSO. - X4f  | -484.020   | 0.0000 | ***     | -586.221162  | -381.818838  |
| DMSO. - X4k  | -904.545   | 0.0000 | ***     | -1006.746162 | -802.343838  |
| DMSO. - X4q  | -1001.510  | 0.0000 | ***     | -1109.910702 | -893.109298  |
| DMSO. - X4r  | -654.065   | 0.0000 | ***     | -756.266162  | -551.863838  |
| DMSO. - X4s  | -145.130   | 0.0001 | ***     | -247.331162  | -42.928838   |
| DMSO. - X4t  | -809.095   | 0.0000 | ***     | -911.296162  | -706.893838  |
| DMSO. - X4u  | -1023.690  | 0.0000 | ***     | -1125.891162 | -921.488838  |
| MMS. - X4b   | 157.525    | 0.0000 | ***     | 55.323838    | 259.726162   |
| MMS. - X4c   | -41.225    | 1.0000 |         | -143.426162  | 60.976162    |
| MMS. - X4d   | -87.820    | 0.2702 |         | -190.021162  | 14.381162    |
| MMS. - X4e   | 11.350     | 1.0000 |         | -90.851162   | 113.551162   |
| MMS. - X4f   | -84.295    | 0.3954 |         | -186.496162  | 17.906162    |
| MMS. - X4k   | -504.820   | 0.0000 | ***     | -607.021162  | -402.618838  |
| MMS. - X4q   | -601.785   | 0.0000 | ***     | -710.185702  | -493.384298  |
| MMS. - X4r   | -254.340   | 0.0000 | ***     | -356.541162  | -152.138838  |
| MMS. - X4s   | 254.595    | 0.0000 | ***     | 152.393838   | 356.796162   |
| MMS. - X4t   | -409.370   | 0.0000 | ***     | -511.571162  | -307.168838  |
| MMS. - X4u   | -623.965   | 0.0000 | ***     | -726.166162  | -521.763838  |
| X4b - X4c    | -198.750   | 0.0000 | ***     | -300.951162  | -96.548838   |
| X4b - X4d    | -245.345   | 0.0000 | ***     | -347.546162  | -143.143838  |
| X4b - X4e    | -146.175   | 0.0001 | ***     | -248.376162  | -43.973838   |
| X4b - X4f    | -241.820   | 0.0000 | ***     | -344.021162  | -139.618838  |
| X4b - X4k    | -662.345   | 0.0000 | ***     | -764.546162  | -560.143838  |
| X4b - X4q    | -759.310   | 0.0000 | ***     | -867.710702  | -650.909298  |
| X4b - X4r    | -411.865   | 0.0000 | ***     | -514.066162  | -309.663838  |
| X4b - X4s    | 97.070     | 0.0936 | .       | -5.131162    | 199.271162   |
| X4b - X4t    | -566.895   | 0.0000 | ***     | -669.096162  | -464.693838  |
| X4b - X4u    | -781.490   | 0.0000 | ***     | -883.691162  | -679.288838  |
| X4c - X4d    | -46.595    | 1.0000 |         | -148.796162  | 55.606162    |
| X4c - X4e    | 52.575     | 1.0000 |         | -49.626162   | 154.776162   |
| X4c - X4f    | -43.070    | 1.0000 |         | -145.271162  | 59.131162    |
| X4c - X4k    | -463.595   | 0.0000 | ***     | -565.796162  | -361.393838  |

|           |                 |     |             |             |
|-----------|-----------------|-----|-------------|-------------|
| X4c - X4q | -560.560 0.0000 | *** | -668.960702 | -452.159298 |
| X4c - X4r | -213.115 0.0000 | *** | -315.316162 | -110.913838 |
| X4c - X4s | 295.820 0.0000  | *** | 193.618838  | 398.021162  |
| X4c - X4t | -368.145 0.0000 | *** | -470.346162 | -265.943838 |
| X4c - X4u | -582.740 0.0000 | *** | -684.941162 | -480.538838 |
| X4d - X4e | 99.170 0.0727   | .   | -3.031162   | 201.371162  |
| X4d - X4f | 3.525 1.0000    |     | -98.676162  | 105.726162  |
| X4d - X4k | -417.000 0.0000 | *** | -519.201162 | -314.798838 |
| X4d - X4q | -513.965 0.0000 | *** | -622.365702 | -405.564298 |
| X4d - X4r | -166.520 0.0000 | *** | -268.721162 | -64.318838  |
| X4d - X4s | 342.415 0.0000  | *** | 240.213838  | 444.616162  |
| X4d - X4t | -321.550 0.0000 | *** | -423.751162 | -219.348838 |
| X4d - X4u | -536.145 0.0000 | *** | -638.346162 | -433.943838 |
| X4e - X4f | -95.645 0.1108  |     | -197.846162 | 6.556162    |
| X4e - X4k | -516.170 0.0000 | *** | -618.371162 | -413.968838 |
| X4e - X4q | -613.135 0.0000 | *** | -721.535702 | -504.734298 |
| X4e - X4r | -265.690 0.0000 | *** | -367.891162 | -163.488838 |
| X4e - X4s | 243.245 0.0000  | *** | 141.043838  | 345.446162  |
| X4e - X4t | -420.720 0.0000 | *** | -522.921162 | -318.518838 |
| X4e - X4u | -635.315 0.0000 | *** | -737.516162 | -533.113838 |
| X4f - X4k | -420.525 0.0000 | *** | -522.726162 | -318.323838 |
| X4f - X4q | -517.490 0.0000 | *** | -625.890702 | -409.089298 |
| X4f - X4r | -170.045 0.0000 | *** | -272.246162 | -67.843838  |
| X4f - X4s | 338.890 0.0000  | *** | 236.688838  | 441.091162  |
| X4f - X4t | -325.075 0.0000 | *** | -427.276162 | -222.873838 |
| X4f - X4u | -539.670 0.0000 | *** | -641.871162 | -437.468838 |
| X4k - X4q | -96.965 0.1808  |     | -205.365702 | 11.435702   |
| X4k - X4r | 250.480 0.0000  | *** | 148.278838  | 352.681162  |
| X4k - X4s | 759.415 0.0000  | *** | 657.213838  | 861.616162  |
| X4k - X4t | 95.450 0.1134   |     | -6.751162   | 197.651162  |
| X4k - X4u | -119.145 0.0052 | **  | -221.346162 | -16.943838  |
| X4q - X4r | 347.445 0.0000  | *** | 239.044298  | 455.845702  |
| X4q - X4s | 856.380 0.0000  | *** | 747.979298  | 964.780702  |
| X4q - X4t | 192.415 0.0000  | *** | 84.014298   | 300.815702  |
| X4q - X4u | -22.180 1.0000  |     | -130.580702 | 86.220702   |
| X4r - X4s | 508.935 0.0000  | *** | 406.733838  | 611.136162  |
| X4r - X4t | -155.030 0.0000 | *** | -257.231162 | -52.828838  |
| X4r - X4u | -369.625 0.0000 | *** | -471.826162 | -267.423838 |
| X4s - X4t | -663.965 0.0000 | *** | -766.166162 | -561.763838 |
| X4s - X4u | -878.560 0.0000 | *** | -980.761162 | -776.358838 |
| X4t - X4u | -214.595 0.0000 | *** | -316.796162 | -112.393838 |

**Statistical Analyses S2.** Kruskal Wallis test's applied to comet assay of CHO cells exposed to bis(spiropyrazolone)cyclopropanes **4** (Figure 3).

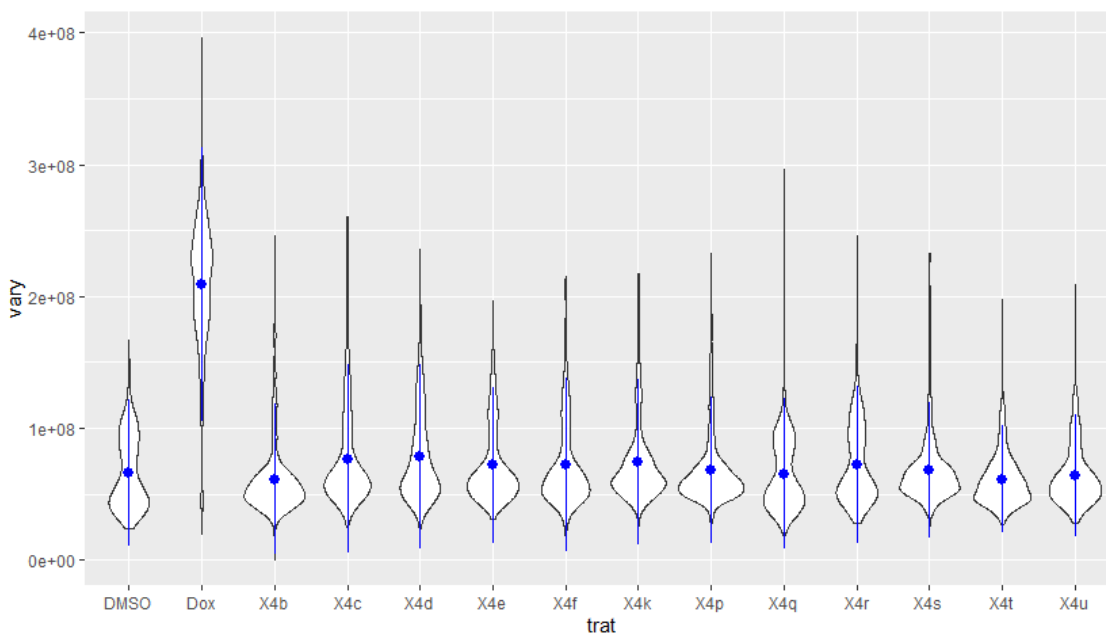

#### \$statistics

| Chisq    | Df | p.chisq | t.value  | MSD      |
|----------|----|---------|----------|----------|
| 1708.307 | 13 | 0       | 1.960247 | 245.1376 |

#### \$parameters

| test           | p.adjusted | name | t  | ntr  | alpha |
|----------------|------------|------|----|------|-------|
| Kruskal-Wallis | none       | trat | 14 | 0.05 |       |

#### \$means

|      | vary      | rank     | std      | r   | Min        | Max       | Q25       | Q50       | Q75       |
|------|-----------|----------|----------|-----|------------|-----------|-----------|-----------|-----------|
| DMSO | 66045840  | 3568.301 | 27896533 | 600 | 23429540.0 | 166553500 | 42784380  | 57045840  | 89134120  |
| Dox  | 209447368 | 7865.864 | 51979579 | 600 | 19864180.0 | 396264900 | 183361600 | 217996600 | 240916800 |
| X4b  | 61401527  | 3115.134 | 28639223 | 600 | 509337.8   | 246519500 | 45331070  | 53989810  | 65195240  |
| X4c  | 76526316  | 4376.037 | 35814130 | 600 | 24957560.0 | 260781000 | 52843805  | 62648560  | 92954160  |
| X4d  | 78343803  | 4521.320 | 34892342 | 600 | 23429540.0 | 235314100 | 52461800  | 65704580  | 95755520  |
| X4e  | 71876061  | 4164.706 | 29613974 | 600 | 31069610.0 | 197113800 | 51443120  | 61120540  | 82640065  |
| X4f  | 72036501  | 4055.789 | 32998506 | 600 | 18845500.0 | 215449900 | 49915110  | 61629880  | 83022070  |
| X4k  | 74173175  | 4427.186 | 31543285 | 600 | 25976230.0 | 217487300 | 55008490  | 63667230  | 80093375  |
| X4p  | 68013582  | 3946.407 | 27613069 | 600 | 27504240.0 | 232767400 | 51825125  | 60101870  | 71816640  |
| X4q  | 65551784  | 3537.702 | 28621584 | 600 | 18336160.0 | 296944000 | 43293720  | 56791170  | 86714765  |
| X4r  | 72132428  | 4106.395 | 29902529 | 600 | 27504240.0 | 246010200 | 48896430  | 61629880  | 94736840  |
| X4s  | 68389643  | 4118.727 | 25773413 | 600 | 25976230.0 | 232258100 | 52971140  | 62648560  | 73344650  |
| X4t  | 61194397  | 3386.662 | 20212790 | 600 | 26485570.0 | 198132400 | 46859090  | 57045840  | 69779290  |
| X4u  | 64116299  | 3616.770 | 23301875 | 600 | 28013580.0 | 209337900 | 47877760  | 58573850  | 72325970  |

#### \$comparison

NULL

#### \$groups

|     | vary     | groups |
|-----|----------|--------|
| Dox | 7865.864 | a      |
| X4d | 4521.320 | b      |

|      |          |    |
|------|----------|----|
| X4k  | 4427.186 | b  |
| X4c  | 4376.037 | bc |
| X4e  | 4164.706 | cd |
| X4s  | 4118.727 | d  |
| X4r  | 4106.395 | d  |
| X4f  | 4055.789 | d  |
| X4p  | 3946.407 | d  |
| X4u  | 3616.770 | e  |
| DMSO | 3568.301 | e  |
| X4q  | 3537.702 | e  |
| X4t  | 3386.662 | e  |
| X4b  | 3115.134 | f  |

#### \$statistics

| Chisq    | Df | p.chisq | t.value  | MSD      |
|----------|----|---------|----------|----------|
| 1708.307 | 13 | 0       | 3.456746 | 432.2815 |

#### \$parameters

| test           | p.adjusted | name.t | ntr | alpha |
|----------------|------------|--------|-----|-------|
| Kruskal-Wallis | bonferroni | trat   | 14  | 0.05  |

#### \$means

|      | vary      | rank     | std      | r   | Min        | Max       | Q25       | Q50       | Q75       |
|------|-----------|----------|----------|-----|------------|-----------|-----------|-----------|-----------|
| DMSO | 66045840  | 3568.301 | 27896533 | 600 | 23429540.0 | 166553500 | 42784380  | 57045840  | 89134120  |
| Dox  | 209447368 | 7865.864 | 51979579 | 600 | 19864180.0 | 396264900 | 183361600 | 217996600 | 240916800 |
| X4b  | 61401527  | 3115.134 | 28639223 | 600 | 509337.8   | 246519500 | 45331070  | 53989810  | 65195240  |
| X4c  | 76526316  | 4376.037 | 35814130 | 600 | 24957560.0 | 260781000 | 52843805  | 62648560  | 92954160  |
| X4d  | 78343803  | 4521.320 | 34892342 | 600 | 23429540.0 | 235314100 | 52461800  | 65704580  | 95755520  |
| X4e  | 71876061  | 4164.706 | 29613974 | 600 | 31069610.0 | 197113800 | 51443120  | 61120540  | 82640065  |
| X4f  | 72036501  | 4055.789 | 32998506 | 600 | 18845500.0 | 215449900 | 49915110  | 61629880  | 83022070  |
| X4k  | 74173175  | 4427.186 | 31543285 | 600 | 25976230.0 | 217487300 | 55008490  | 63667230  | 80093375  |
| X4p  | 68013582  | 3946.407 | 27613069 | 600 | 27504240.0 | 232767400 | 51825125  | 60101870  | 71816640  |
| X4q  | 65551784  | 3537.702 | 28621584 | 600 | 18336160.0 | 296944000 | 43293720  | 56791170  | 86714765  |
| X4r  | 72132428  | 4106.395 | 29902529 | 600 | 27504240.0 | 246010200 | 48896430  | 61629880  | 94736840  |
| X4s  | 68389643  | 4118.727 | 25773413 | 600 | 25976230.0 | 232258100 | 52971140  | 62648560  | 73344650  |
| X4t  | 61194397  | 3386.662 | 20212790 | 600 | 26485570.0 | 198132400 | 46859090  | 57045840  | 69779290  |
| X4u  | 64116299  | 3616.770 | 23301875 | 600 | 28013580.0 | 209337900 | 47877760  | 58573850  | 72325970  |

#### \$comparison

|            | Difference  | pvalue | Signif. | LCL          | UCL          |
|------------|-------------|--------|---------|--------------|--------------|
| DMSO - Dox | -4297.56333 | 0.0000 | ***     | -4729.844865 | -3865.281801 |
| DMSO - X4b | 453.16667   | 0.0266 | *       | 20.885135    | 885.448199   |
| DMSO - X4c | -807.73583  | 0.0000 | ***     | -1240.017365 | -375.454301  |
| DMSO - X4d | -953.01917  | 0.0000 | ***     | -1385.300699 | -520.737635  |
| DMSO - X4e | -596.40500  | 0.0002 | ***     | -1028.686532 | -164.123468  |
| DMSO - X4f | -487.48833  | 0.0089 | **      | -919.769865  | -55.206801   |
| DMSO - X4k | -858.88500  | 0.0000 | ***     | -1291.166532 | -426.603468  |
| DMSO - X4p | -378.10583  | 0.2280 |         | -810.387365  | 54.175699    |
| DMSO - X4q | 30.59917    | 1.0000 |         | -401.682365  | 462.880699   |
| DMSO - X4r | -538.09417  | 0.0016 | **      | -970.375699  | -105.812635  |
| DMSO - X4s | -550.42667  | 0.0010 | ***     | -982.708199  | -118.145135  |
| DMSO - X4t | 181.63833   | 1.0000 |         | -250.643199  | 613.919865   |

|            |                    |     |                          |
|------------|--------------------|-----|--------------------------|
| DMSO - X4u | -48.46917 1.0000   |     | -480.750699 383.812365   |
| Dox - X4b  | 4750.73000 0.0000  | *** | 4318.448468 5183.011532  |
| Dox - X4c  | 3489.82750 0.0000  | *** | 3057.545968 3922.109032  |
| Dox - X4d  | 3344.54417 0.0000  | *** | 2912.262635 3776.825699  |
| Dox - X4e  | 3701.15833 0.0000  | *** | 3268.876801 4133.439865  |
| Dox - X4f  | 3810.07500 0.0000  | *** | 3377.793468 4242.356532  |
| Dox - X4k  | 3438.67833 0.0000  | *** | 3006.396801 3870.959865  |
| Dox - X4p  | 3919.45750 0.0000  | *** | 3487.175968 4351.739032  |
| Dox - X4q  | 4328.16250 0.0000  | *** | 3895.880968 4760.444032  |
| Dox - X4r  | 3759.46917 0.0000  | *** | 3327.187635 4191.750699  |
| Dox - X4s  | 3747.13667 0.0000  | *** | 3314.855135 4179.418199  |
| Dox - X4t  | 4479.20167 0.0000  | *** | 4046.920135 4911.483199  |
| Dox - X4u  | 4249.09417 0.0000  | *** | 3816.812635 4681.375699  |
| X4b - X4c  | -1260.90250 0.0000 | *** | -1693.184032 -828.620968 |
| X4b - X4d  | -1406.18583 0.0000 | *** | -1838.467365 -973.904301 |
| X4b - X4e  | -1049.57167 0.0000 | *** | -1481.853199 -617.290135 |
| X4b - X4f  | -940.65500 0.0000  | *** | -1372.936532 -508.373468 |
| X4b - X4k  | -1312.05167 0.0000 | *** | -1744.333199 -879.770135 |
| X4b - X4p  | -831.27250 0.0000  | *** | -1263.554032 -398.990968 |
| X4b - X4q  | -422.56750 0.0665  | .   | -854.849032 9.714032     |
| X4b - X4r  | -991.26083 0.0000  | *** | -1423.542365 -558.979301 |
| X4b - X4s  | -1003.59333 0.0000 | *** | -1435.874865 -571.311801 |
| X4b - X4t  | -271.52833 1.0000  |     | -703.809865 160.753199   |
| X4b - X4u  | -501.63583 0.0055  | **  | -933.917365 -69.354301   |
| X4c - X4d  | -145.28333 1.0000  |     | -577.564865 286.998199   |
| X4c - X4e  | 211.33083 1.0000   |     | -220.950699 643.612365   |
| X4c - X4f  | 320.24750 0.9517   |     | -112.034032 752.529032   |
| X4c - X4k  | -51.14917 1.0000   |     | -483.430699 381.132365   |
| X4c - X4p  | 429.63000 0.0541   | .   | -2.651532 861.911532     |
| X4c - X4q  | 838.33500 0.0000   | *** | 406.053468 1270.616532   |
| X4c - X4r  | 269.64167 1.0000   |     | -162.639865 701.923199   |
| X4c - X4s  | 257.30917 1.0000   |     | -174.972365 689.590699   |
| X4c - X4t  | 989.37417 0.0000   | *** | 557.092635 1421.655699   |
| X4c - X4u  | 759.26667 0.0000   | *** | 326.985135 1191.548199   |
| X4d - X4e  | 356.61417 0.3967   |     | -75.667365 788.895699    |
| X4d - X4f  | 465.53083 0.0181   | *   | 33.249301 897.812365     |
| X4d - X4k  | 94.13417 1.0000    |     | -338.147365 526.415699   |
| X4d - X4p  | 574.91333 0.0004   | *** | 142.631801 1007.194865   |
| X4d - X4q  | 983.61833 0.0000   | *** | 551.336801 1415.899865   |
| X4d - X4r  | 414.92500 0.0829   | .   | -17.356532 847.206532    |
| X4d - X4s  | 402.59250 0.1174   |     | -29.689032 834.874032    |
| X4d - X4t  | 1134.65750 0.0000  | *** | 702.375968 1566.939032   |
| X4d - X4u  | 904.55000 0.0000   | *** | 472.268468 1336.831532   |
| X4e - X4f  | 108.91667 1.0000   |     | -323.364865 541.198199   |
| X4e - X4k  | -262.48000 1.0000  |     | -694.761532 169.801532   |
| X4e - X4p  | 218.29917 1.0000   |     | -213.982365 650.580699   |
| X4e - X4q  | 627.00417 0.0000   | *** | 194.722635 1059.285699   |
| X4e - X4r  | 58.31083 1.0000    |     | -373.970699 490.592365   |
| X4e - X4s  | 45.97833 1.0000    |     | -386.303199 478.259865   |
| X4e - X4t  | 778.04333 0.0000   | *** | 345.761801 1210.324865   |
| X4e - X4u  | 547.93583 0.0011   | **  | 115.654301 980.217365    |
| X4f - X4k  | -371.39667 0.2719  |     | -803.678199 60.884865    |
| X4f - X4p  | 109.38250 1.0000   |     | -322.899032 541.664032   |

|           |                   |     |              |             |
|-----------|-------------------|-----|--------------|-------------|
| X4f - X4q | 518.08750 0.0032  | **  | 85.805968    | 950.369032  |
| X4f - X4r | -50.60583 1.0000  |     | -482.887365  | 381.675699  |
| X4f - X4s | -62.93833 1.0000  |     | -495.219865  | 369.343199  |
| X4f - X4t | 669.12667 0.0000  | *** | 236.845135   | 1101.408199 |
| X4f - X4u | 439.01917 0.0409  | *   | 6.737635     | 871.300699  |
| X4k - X4p | 480.77917 0.0111  | *   | 48.497635    | 913.060699  |
| X4k - X4q | 889.48417 0.0000  | *** | 457.202635   | 1321.765699 |
| X4k - X4r | 320.79083 0.9399  |     | -111.490699  | 753.072365  |
| X4k - X4s | 308.45833 1.0000  |     | -123.823199  | 740.739865  |
| X4k - X4t | 1040.52333 0.0000 | *** | 608.241801   | 1472.804865 |
| X4k - X4u | 810.41583 0.0000  | *** | 378.134301   | 1242.697365 |
| X4p - X4q | 408.70500 0.0989  | .   | -23.576532   | 840.986532  |
| X4p - X4r | -159.98833 1.0000 |     | -592.269865  | 272.293199  |
| X4p - X4s | -172.32083 1.0000 |     | -604.602365  | 259.960699  |
| X4p - X4t | 559.74417 0.0007  | *** | 127.462635   | 992.025699  |
| X4p - X4u | 329.63667 0.7649  |     | -102.644865  | 761.918199  |
| X4q - X4r | -568.69333 0.0005 | *** | -1000.974865 | -136.411801 |
| X4q - X4s | -581.02583 0.0003 | *** | -1013.307365 | -148.744301 |
| X4q - X4t | 151.03917 1.0000  |     | -281.242365  | 583.320699  |
| X4q - X4u | -79.06833 1.0000  |     | -511.349865  | 353.213199  |
| X4r - X4s | -12.33250 1.0000  |     | -444.614032  | 419.949032  |
| X4r - X4t | 719.73250 0.0000  | *** | 287.450968   | 1152.014032 |
| X4r - X4u | 489.62500 0.0083  | **  | 57.343468    | 921.906532  |
| X4s - X4t | 732.06500 0.0000  | *** | 299.783468   | 1164.346532 |
| X4s - X4u | 501.95750 0.0055  | **  | 69.675968    | 934.239032  |
| X4t - X4u | -230.10750 1.0000 |     | -662.389032  | 202.174032  |

\$groups  
NULL
